# Supplementary material for: Unraveling the Role of Acetic Acid Bacteria Comparing Two Acetification Profiles From Natural Raw Materials: A Quantitative Approach in Komagataeibacter europaeus
Source: Front Microbiol. 2022 Apr 29;13:840119. doi: 10.3389/fmicb.2022.840119 (PMC9100681; doi:10.3389/fmicb.2022.840119)
Supplement: Supplementary file 7 [file Data_Sheet_2.XLSX]

## Sheet: INM_1
File S2. List of total proteins that compose each of the INM (Interaction network map), those with a PPI enrichment p-value < 0.05. The node code, the identifier, and annotated functions of network proteins based on the databases Uniprot (http://www.uniprot.org) and KEGG (https://www.genome.jp/kegg/) are included.
#Node	Identifier	Annotation
H845_1019	1296990.H845_1019	Uncharacterized protein; Cytoplasmic
H845_1215	1296990.H845_1215	Succinic semialdehyde dehydrogenase; Cytoplasmic; Belongs to the aldehyde dehydrogenase family
H845_1241	1296990.H845_1241	Fructose-1,6-bisphosphatase; Cytoplasmic
H845_1242	1296990.H845_1242	Fructose-bisphosphate aldolase; Cytoplasmic
H845_1324	1296990.H845_1324	annotation not available
H845_1334	1296990.H845_1334	Tas protein; [G] Carbohydrate transport and metabolism; [C] Energy production and conversion; [R] general function prediction only; [E] Amino acid transport and metabolism; Cytoplasmic
H845_1343	1296990.H845_1343	Alkyl hydroperoxide reductase subunit F; [O] Posttranslational modification, protein turnover, chaperones; [H] Coenzyme transport and metabolism; [C] Energy production and conversion; [R] general function prediction only; [P] Inorganic ion transport and metabolism; CytoplasmicMembrane
H845_1365	1296990.H845_1365	annotation not available
H845_1413	1296990.H845_1413	Myosin-cross-reactive antigen; Cytoplasmic
H845_1418	1296990.H845_1418	Fructose-1,6-bisphosphate aldolase; Periplasmic
H845_1464	1296990.H845_1464	Diguanylate cyclase (GGDEF)/phosphodiesterase (EAL) with PAS and GAF domains; [G] Carbohydrate transport and metabolism; [T] Signal transduction mechanisms; CytoplasmicMembrane
H845_1469	1296990.H845_1469	Formate dehydrogenase alpha subunit; Cytoplasmic; Belongs to the prokaryotic molybdopterin-containing oxidoreductase family
H845_1637	1296990.H845_1637	annotation not available
H845_1641	1296990.H845_1641	annotation not available
H845_1655	1296990.H845_1655	D-3-phosphoglycerate dehydrogenase; Cytoplasmic; Belongs to the D-isomer specific 2-hydroxyacid dehydrogenase family
H845_1659	1296990.H845_1659	Prephenate dehydratase; Cytoplasmic
H845_1670	1296990.H845_1670	Cobalt chelatase, pCobT subunit; Cytoplasmic
H845_1671	1296990.H845_1671	Cobalt chelatase, pCobS small subunit; Cytoplasmic
H845_1703	1296990.H845_1703	Putative molybdopterin biosynthesis protein moeA; Cytoplasmic
H845_1710	1296990.H845_1710	Gluconate 2-dehydrogenase (Acceptor); CytoplasmicMembrane
H845_1712	1296990.H845_1712	Mannitol dehydrogenase domain protein; Cytoplasmic; Belongs to the mannitol dehydrogenase family
H845_1731	1296990.H845_1731	Enoyl-[acyl-carrier-protein] reductase [NADH]; [R] general function prediction only; [I] Lipid transport and metabolism; [L] Replication, recombination and repair; [S] Function unknown; CytoplasmicMembrane
H845_1735	1296990.H845_1735	Sulfate adenylyltransferase subunit 2; Cytoplasmic
H845_1738	1296990.H845_1738	Nitrite/sulfite reductase hemoprotein beta-component ferrodoxin domain protein; Cytoplasmic
H845_1751	1296990.H845_1751	Carboxymethylenebutenolidase; Cytoplasmic
H845_1767	1296990.H845_1767	Short-chain dehydrogenase/reductase SDR; Cytoplasmic
H845_1823	1296990.H845_1823	Beta-lactamase domain protein; Cytoplasmic
H845_1858	1296990.H845_1858	Thiosulfate sulfurtransferase; [H] Coenzyme transport and metabolism; [C] Energy production and conversion; [P] Inorganic ion transport and metabolism; [R] general function prediction only; Cytoplasmic
H845_1872	1296990.H845_1872	Alcohol dehydrogenase; Cytoplasmic
H845_1873	1296990.H845_1873	Putative cystathionine beta-lyase; [H] Coenzyme transport and metabolism; [M] Cell wall/membrane/envelope biogenesis; [E] Amino acid transport and metabolism; [L] Replication, recombination and repair; Cytoplasmic
H845_1900	1296990.H845_1900	Pyruvate dehydrogenase E1 component subunit beta; The pyruvate dehydrogenase complex catalyzes the overall conversion of pyruvate to acetyl-CoA and CO2
H845_1955	1296990.H845_1955	Uracil-DNA glycosylase superfamily protein; Cytoplasmic
H845_1966	1296990.H845_1966	Glucose-6-phosphate 1-dehydrogenase; Catalyzes the oxidation of glucose 6-phosphate to 6- phosphogluconolactone
H845_1997	1296990.H845_1997	Arylesterase; Cytoplasmic
H845_2	1296990.H845_2	Probable phosphoketolase; Cytoplasmic
H845_2008	1296990.H845_2008	Aldehyde dehydrogenase; Cytoplasmic
H845_2024	1296990.H845_2024	Nitroreductase; Cytoplasmic
H845_2051	1296990.H845_2051	ATP-dependent Clp protease proteolytic subunit; Cleaves peptides in various proteins in a process that requires ATP hydrolysis. Has a chymotrypsin-like activity. Plays a major role in the degradation of misfolded proteins; Belongs to the peptidase S14 family
H845_2057	1296990.H845_2057	23S rRNA (Uracil-5-)-methyltransferase RumA; Cytoplasmic; Belongs to the class I-like SAM-binding methyltransferase superfamily. RNA M5U methyltransferase family
H845_2064	1296990.H845_2064	Cysteine desulfurase activator complex subunit SufB; Cytoplasmic
H845_21	1296990.H845_21	Putative transcriptional regulator; [K] Transcription; [G] Carbohydrate transport and metabolism; [E] Amino acid transport and metabolism; [S] Function unknown; Cytoplasmic
H845_2102	1296990.H845_2102	annotation not available
H845_2153	1296990.H845_2153	Putative oxidoreductase; Cytoplasmic
H845_2159	1296990.H845_2159	FAD linked oxidase domain protein; [C] Energy production and conversion; [M] Cell wall/membrane/envelope biogenesis; [T] Signal transduction mechanisms; [I] Lipid transport and metabolism; [S] Function unknown; Cytoplasmic
H845_2176	1296990.H845_2176	Threonine dehydratase; Cytoplasmic
H845_2183	1296990.H845_2183	annotation not available
H845_2274	1296990.H845_2274	Insulinase protein; [O] Posttranslational modification, protein turnover, chaperones; [K] Transcription; [R] general function prediction only; [S] Function unknown
H845_2292	1296990.H845_2292	NADP-dependent L-serine/L-allo-threonine dehydrogenase; Cytoplasmic; Belongs to the short-chain dehydrogenases/reductases (SDR) family
H845_2331	1296990.H845_2331	annotation not available
H845_2359	1296990.H845_2359	annotation not available
H845_2460	1296990.H845_2460	Alcohol dehydrogenase zinc-binding domain protein; [H] Coenzyme transport and metabolism; [F] Nucleotide transport and metabolism; [R] general function prediction only; [M] Cell wall/membrane/envelope biogenesis; [I] Lipid transport and metabolism; [E] Amino acid transport and metabolism; Cytoplasmic
H845_2473	1296990.H845_2473	annotation not available
H845_2486	1296990.H845_2486	Dihydroorotase, multinoteal complex type; [F] Nucleotide transport and metabolism; [Q] Secondary metabolites biosynthesis, transport and catabolism; [M] Cell wall/membrane/envelope biogenesis; [R] general function prediction only; [E] Amino acid transport and metabolism; Cytoplasmic
H845_2503	1296990.H845_2503	Riboflavin biosynthesis protein; Cytoplasmic; Belongs to the ribF family
H845_2527	1296990.H845_2527	Putative ubiquinol-cytochrome c reductase; Cytoplasmic
H845_253	1296990.H845_253	Isocitrate dehydrogenase [NADP]; Cytoplasmic; Belongs to the isocitrate and isopropylmalate dehydrogenases family
H845_2540	1296990.H845_2540	Diguanylate cyclase/phosphodiesterase; [O] Posttranslational modification, protein turnover, chaperones; [U] Intracellular trafficking, secretion, and vesicular transport; [T] Signal transduction mechanisms; CytoplasmicMembrane
H845_2567	1296990.H845_2567	NAD-dependent epimerase/dehydratase; [G] Carbohydrate transport and metabolism; [F] Nucleotide transport and metabolism; [M] Cell wall/membrane/envelope biogenesis; [E] Amino acid transport and metabolism; Cytoplasmic
H845_2608	1296990.H845_2608	Tol-pal system-associated acyl-CoA thioesterase; Cytoplasmic
H845_2649	1296990.H845_2649	annotation not available
H845_2714	1296990.H845_2714	Diguanylate cyclase; [G] Carbohydrate transport and metabolism; [C] Energy production and conversion; [M] Cell wall/membrane/envelope biogenesis; [T] Signal transduction mechanisms; CytoplasmicMembrane
H845_2715	1296990.H845_2715	C-di-GMP phosphodiesterase A; CytoplasmicMembrane
H845_2721	1296990.H845_2721	2,5-diketo-D-gluconic acid reductase; [V] Defense mechanisms; [R] general function prediction only; [P] Inorganic ion transport and metabolism; [T] Signal transduction mechanisms; [E] Amino acid transport and metabolism; Cytoplasmic
H845_2789	1296990.H845_2789	Xanthine dehydrogenase accessory factor CoxI; Cytoplasmic
H845_2837	1296990.H845_2837	DEAD/DEAH box helicase domain protein; Cytoplasmic; Belongs to the DEAD box helicase family
H845_2871	1296990.H845_2871	Glutamine synthetase; Cytoplasmic
H845_2913	1296990.H845_2913	Histidinol-phosphate aminotransferase; Cytoplasmic; Belongs to the class-II pyridoxal-phosphate-dependent aminotransferase family. Histidinol-phosphate aminotransferase subfamily
H845_2922	1296990.H845_2922	Mannitol 2-dehydrogenase; [H] Coenzyme transport and metabolism; [G] Carbohydrate transport and metabolism; [M] Cell wall/membrane/envelope biogenesis; [E] Amino acid transport and metabolism; Cytoplasmic; Belongs to the mannitol dehydrogenase family
H845_2978	1296990.H845_2978	Branched-chain-amino-acid aminotransferase; Cytoplasmic
H845_2979	1296990.H845_2979	annotation not available
H845_2999	1296990.H845_2999	C-di-GMP phosphodiesterase A; CytoplasmicMembrane
H845_3000	1296990.H845_3000	Diguanylate cyclase/phosphodiesterase (GGDEF & EAL domains) with PAS/PAC sensor(S); [F] Nucleotide transport and metabolism; [M] Cell wall/membrane/envelope biogenesis; [T] Signal transduction mechanisms; [J] Translation, ribosomal structure and biogenesis; CytoplasmicMembrane
H845_3009	1296990.H845_3009	Glucose-6-phosphate 1-dehydrogenase; Catalyzes the oxidation of glucose 6-phosphate to 6- phosphogluconolactone
H845_3024	1296990.H845_3024	NADH dehydrogenase; [O] Posttranslational modification, protein turnover, chaperones; [U] Intracellular trafficking, secretion, and vesicular transport; [C] Energy production and conversion; [R] general function prediction only
H845_3049	1296990.H845_3049	2-nitropropane dioxygenase, NPD; Cytoplasmic
H845_3077	1296990.H845_3077	Uncharacterized protein; Cytoplasmic
H845_3169	1296990.H845_3169	HAD-superfamily hydrolase, subfamily IA, variant 3; Cytoplasmic
H845_319	1296990.H845_319	annotation not available
H845_3221	1296990.H845_3221	Pyruvate kinase; Cytoplasmic; Belongs to the pyruvate kinase family
H845_334	1296990.H845_334	Aminopeptidase; Cytoplasmic
H845_3413	1296990.H845_3413	Flavin-containing monooxygenase; [O] Posttranslational modification, protein turnover, chaperones; [P] Inorganic ion transport and metabolism; [R] general function prediction only; [F] Nucleotide transport and metabolism; [C] Energy production and conversion; [L] Replication, recombination and repair; [Q] Secondary metabolites biosynthesis, transport and catabolism; Cytoplasmic
H845_3415	1296990.H845_3415	Glycosyl transferase; Cytoplasmic
H845_3421	1296990.H845_3421	Transcriptional regulator MocR/GntR; [K] Transcription; [R] general function prediction only; [I] Lipid transport and metabolism; [E] Amino acid transport and metabolism; [C] Energy production and conversion; [L] Replication, recombination and repair; Cytoplasmic
H845_345	1296990.H845_345	Cobalamin synthesis protein P47K; [R] general function prediction only; [E] Amino acid transport and metabolism; [L] Replication, recombination and repair; Cytoplasmic
H845_3458	1296990.H845_3458	Ribonuclease VapC; Toxic component of a toxin-antitoxin (TA) module. An RNase
H845_346	1296990.H845_346	WD-40 repeat protein; Periplasmic
H845_35	1296990.H845_35	Nitrilase/cyanide hydratase and apolipoprotein N-acyltransferase; Cytoplasmic
H845_351	1296990.H845_351	FAD dependent oxidoreductase; Cytoplasmic
H845_37	1296990.H845_37	Phosphoserine phosphatase SerB; Cytoplasmic
H845_3703	1296990.H845_3703	Uncharacterized protein; Cytoplasmic
H845_402	1296990.H845_402	Glyceraldehyde-3-phosphate dehydrogenase; [G] Carbohydrate transport and metabolism; [V] Defense mechanisms; [R] general function prediction only; [P] Inorganic ion transport and metabolism; [E] Amino acid transport and metabolism; [L] Replication, recombination and repair; Cytoplasmic; Belongs to the glyceraldehyde-3-phosphate dehydrogenase family
H845_406	1296990.H845_406	5-aminolevulinate synthase; Cytoplasmic
H845_421	1296990.H845_421	Recombination factor protein RarA; [O] Posttranslational modification, protein turnover, chaperones; [G] Carbohydrate transport and metabolism; [R] general function prediction only; [M] Cell wall/membrane/envelope biogenesis; [L] Replication, recombination and repair; Cytoplasmic
H845_422	1296990.H845_422	Pseudouridine synthase; Responsible for synthesis of pseudouridine from uracil
H845_430	1296990.H845_430	Two component, sigma54 specific, transcriptional regulator, Fis family protein; [G] Carbohydrate transport and metabolism; [R] general function prediction only; [P] Inorganic ion transport and metabolism; [T] Signal transduction mechanisms; [S] Function unknown; Cytoplasmic
H845_441	1296990.H845_441	Phosphoserine aminotransferase; Catalyzes the reversible conversion of 3- phosphohydroxypyruvate to phosphoserine and of 3-hydroxy-2-oxo-4- phosphonooxybutanoate to phosphohydroxythreonine
H845_475	1296990.H845_475	Pyridine nucleotide-disulfide oxidoreductase dimerization region; Cytoplasmic; Belongs to the class-I pyridine nucleotide-disulfide oxidoreductase family
H845_477	1296990.H845_477	Phospho-2-dehydro-3-deoxyheptonate aldolase; Cytoplasmic
H845_480	1296990.H845_480	Glutamate--tRNA ligase; Catalyzes the attachment of glutamate to tRNA(Glu) in a two-step reaction: glutamate is first activated by ATP to form Glu-AMP and then transferred to the acceptor end of tRNA(Glu); Belongs to the class-I aminoacyl-tRNA synthetase family. Glutamate--tRNA ligase type 1 subfamily
H845_501	1296990.H845_501	annotation not available
H845_513	1296990.H845_513	Uncharacterized protein; [K] Transcription; [R] general function prediction only; [M] Cell wall/membrane/envelope biogenesis; [I] Lipid transport and metabolism; [S] Function unknown; Cytoplasmic
H845_553	1296990.H845_553	3'-5' exonuclease; Cytoplasmic
H845_556	1296990.H845_556	Putative oxidoreductase; Cytoplasmic
H845_559	1296990.H845_559	ABC-1 domain protein; CytoplasmicMembrane
H845_604	1296990.H845_604	Alcohol dehydrogenase; [O] Posttranslational modification, protein turnover, chaperones; [K] Transcription; [G] Carbohydrate transport and metabolism; [C] Energy production and conversion; [P] Inorganic ion transport and metabolism; [D] Cell cycle control, cell division, chromosome partitioning; [S] Function unknown; Periplasmic
H845_624	1296990.H845_624	ABC transporter related protein; [G] Carbohydrate transport and metabolism; [V] Defense mechanisms; [R] general function prediction only; [M] Cell wall/membrane/envelope biogenesis; [I] Lipid transport and metabolism; [J] Translation, ribosomal structure and biogenesis; CytoplasmicMembrane
H845_636	1296990.H845_636	annotation not available
H845_639	1296990.H845_639	Gamma-glutamyltranspeptidase; Periplasmic
H845_649	1296990.H845_649	DNA helicase; [H] Coenzyme transport and metabolism; [R] general function prediction only; [I] Lipid transport and metabolism; [L] Replication, recombination and repair; [S] Function unknown; Cytoplasmic
H845_666	1296990.H845_666	Alpha,alpha-trehalose-phosphate synthase (UDP-forming); Cytoplasmic
H845_820	1296990.H845_820	UDP-glucose 6-dehydrogenase; [O] Posttranslational modification, protein turnover, chaperones; [Q] Secondary metabolites biosynthesis, transport and catabolism; [M] Cell wall/membrane/envelope biogenesis; [P] Inorganic ion transport and metabolism; [S] Function unknown; Cytoplasmic; Belongs to the UDP-glucose/GDP-mannose dehydrogenase family
H845_841	1296990.H845_841	Uncharacterized protein; Cytoplasmic
H845_910	1296990.H845_910	Inositol-1-monophosphatase; Cytoplasmic; Belongs to the inositol monophosphatase superfamily
ade	1296990.H845_2976	Adenine deaminase; [O] Posttranslational modification, protein turnover, chaperones; [G] Carbohydrate transport and metabolism; [F] Nucleotide transport and metabolism; [V] Defense mechanisms; [Q] Secondary metabolites biosynthesis, transport and catabolism; [P] Inorganic ion transport and metabolism; [M] Cell wall/membrane/envelope biogenesis; Cytoplasmic; Belongs to the metallo-dependent hydrol…
adk	1296990.H845_2212	Adenylate kinase; Catalyzes the reversible transfer of the terminal phosphate group between ATP and AMP. Plays an important role in cellular energy homeostasis and in adenine nucleotide metabolism; Belongs to the adenylate kinase family
amn	1296990.H845_2875	AMP nucleosidase; Catalyzes the hydrolysis of the N-glycosidic bond of AMP to form adenine and ribose 5-phosphate. Involved in regulation of AMP concentrations
argJ	1296990.H845_2615	Arginine biosynthesis bifunctional protein ArgJ; Catalyzes two activities which are involved in the cyclic version of arginine biosynthesis: the synthesis of N- acetylglutamate from glutamate and acetyl-CoA as the acetyl donor, and of ornithine by transacetylation between N(2)-acetylornithine and glutamate; Belongs to the ArgJ family
aroA	1296990.H845_2277	3-phosphoshikimate 1-carboxyvinyltransferase; Catalyzes the transfer of the enolpyruvyl moiety of phosphoenolpyruvate (PEP) to the 5-hydroxyl of shikimate-3- phosphate (S3P) to produce enolpyruvyl shikimate-3-phosphate and inorganic phosphate
aroC	1296990.H845_1730	Chorismate synthase; Catalyzes the anti-1,4-elimination of the C-3 phosphate and the C-6 proR hydrogen from 5-enolpyruvylshikimate-3-phosphate (EPSP) to yield chorismate, which is the branch point compound that serves as the starting substrate for the three terminal pathways of aromatic amino acid biosynthesis. This reaction introduces a second double bond into the aromatic ring system
asd	1296990.H845_3010	Aspartate-semialdehyde dehydrogenase; Catalyzes the NADPH-dependent formation of L-aspartate- semialdehyde (L-ASA) by the reductive dephosphorylation of L- aspartyl-4-phosphate; Belongs to the aspartate-semialdehyde dehydrogenase family
atpA	1296990.H845_2680	ATP synthase subunit alpha; Produces ATP from ADP in the presence of a proton gradient across the membrane. The alpha chain is a regulatory subunit
atpD	1296990.H845_2678	ATP synthase subunit beta; Produces ATP from ADP in the presence of a proton gradient across the membrane. The catalytic sites are hosted primarily by the beta subunits
clpB	1296990.H845_44	Chaperone protein ClpB; Part of a stress-induced multi-chaperone system, it is involved in the recovery of the cell from heat-induced damage, in cooperation with DnaK, DnaJ and GrpE; Belongs to the ClpA/ClpB family
clpX	1296990.H845_2050	ATP-dependent Clp protease ATP-binding subunit ClpX; ATP-dependent specificity component of the Clp protease. It directs the protease to specific substrates. Can perform chaperone functions in the absence of ClpP
dapA	1296990.H845_1660	4-hydroxy-tetrahydrodipicolinate synthase; Catalyzes the condensation of (S)-aspartate-beta- semialdehyde [(S)-ASA] and pyruvate to 4-hydroxy- tetrahydrodipicolinate (HTPA)
dapF	1296990.H845_397	Diaminopimelate epimerase; Catalyzes the stereoinversion of LL-2,6- diaminoheptanedioate (L,L-DAP) to meso-diaminoheptanedioate (meso- DAP), a precursor of L-lysine and an essential component of the bacterial peptidoglycan
ddpX	1296990.H845_292	D-alanyl-D-alanine dipeptidase; Catalyzes hydrolysis of the D-alanyl-D-alanine dipeptide
der	1296990.H845_1754	GTPase Der; GTPase that plays an essential role in the late steps of ribosome biogenesis
dnaK	1296990.H845_3147	Chaperone protein DnaK; Acts as a chaperone
eno	1296990.H845_1706	Enolase; Catalyzes the reversible conversion of 2- phosphoglycerate into phosphoenolpyruvate. It is essential for the degradation of carbohydrates via glycolysis; Belongs to the enolase family
fabH	1296990.H845_2079	3-oxoacyl-[acyl-carrier-protein] synthase 3; Catalyzes the condensation reaction of fatty acid synthesis by the addition to an acyl acceptor of two carbons from malonyl-ACP. Catalyzes the first condensation reaction which initiates fatty acid synthesis and may therefore play a role in governing the total rate of fatty acid production. Possesses both acetoacetyl-ACP synthase and acetyl transacylas…
fumC	1296990.H845_171	Fumarate hydratase class II; Involved in the TCA cycle. Catalyzes the stereospecific interconversion of fumarate to L-malate; Belongs to the class-II fumarase/aspartase family. Fumarase subfamily
gatA	1296990.H845_1633	Glutamyl-tRNA(Gln) amidotransferase subunit A; Allows the formation of correctly charged Gln-tRNA(Gln) through the transamidation of misacylated Glu-tRNA(Gln) in organisms which lack glutaminyl-tRNA synthetase. The reaction takes place in the presence of glutamine and ATP through an activated gamma-phospho-Glu-tRNA(Gln)
gcvP	1296990.H845_389	Glycine dehydrogenase (decarboxylating); The glycine cleavage system catalyzes the degradation of glycine. The P protein binds the alpha-amino group of glycine through its pyridoxal phosphate cofactor; CO(2) is released and the remaining methylamine moiety is then transferred to the lipoamide cofactor of the H protein; Belongs to the GcvP family
glk	1296990.H845_681	Glucokinase; [G] Carbohydrate transport and metabolism; [P] Inorganic ion transport and metabolism; [M] Cell wall/membrane/envelope biogenesis; [R] general function prediction only; [L] Replication, recombination and repair; Cytoplasmic; Belongs to the bacterial glucokinase family
glmU	1296990.H845_871	Bifunctional protein GlmU; Catalyzes the last two sequential reactions in the de novo biosynthetic pathway for UDP-N-acetylglucosamine (UDP- GlcNAc). The C-terminal domain catalyzes the transfer of acetyl group from acetyl coenzyme A to glucosamine-1-phosphate (GlcN-1-P) to produce N-acetylglucosamine-1-phosphate (GlcNAc-1-P), which is converted into UDP-GlcNAc by the transfer of uridine 5- monop…
glpK	1296990.H845_1240	Glycerol kinase; Key enzyme in the regulation of glycerol uptake and metabolism. Catalyzes the phosphorylation of glycerol to yield sn- glycerol 3-phosphate; Belongs to the FGGY kinase family
glyA	1296990.H845_1722	Serine hydroxymethyltransferase; Catalyzes the reversible interconversion of serine and glycine with tetrahydrofolate (THF) serving as the one-carbon carrier. This reaction serves as the major source of one-carbon groups required for the biosynthesis of purines, thymidylate, methionine, and other important biomolecules. Also exhibits THF- independent aldolase activity toward beta-hydroxyamino aci…
glyS	1296990.H845_372	Glycine--tRNA ligase beta subunit; [G] Carbohydrate transport and metabolism; [V] Defense mechanisms; [R] general function prediction only; [P] Inorganic ion transport and metabolism; [J] Translation, ribosomal structure and biogenesis; [L] Replication, recombination and repair; Cytoplasmic
gpmI	1296990.H845_2179	2,3-bisphosphoglycerate-independent phosphoglycerate mutase; Catalyzes the interconversion of 2-phosphoglycerate and 3-phosphoglycerate
gpt	1296990.H845_2001	Xanthine phosphoribosyltransferase; Acts on guanine, xanthine and to a lesser extent hypoxanthine; Belongs to the purine/pyrimidine phosphoribosyltransferase family. XGPT subfamily
guaA	1296990.H845_1938	GMP synthase [glutamine-hydrolyzing]; Catalyzes the synthesis of GMP from XMP
hemE	1296990.H845_3168	Uroporphyrinogen decarboxylase; Catalyzes the decarboxylation of four acetate groups of uroporphyrinogen-III to yield coproporphyrinogen-III
hisS	1296990.H845_1692	Histidine--tRNA ligase; Cytoplasmic
hldD	1296990.H845_2806	ADP-L-glycero-D-manno-heptose-6-epimerase; Catalyzes the interconversion between ADP-D-glycero- beta-D-manno-heptose and ADP-L-glycero-beta-D-manno-heptose via an epimerization at carbon 6 of the heptose
ispDF	1296990.H845_425	Bifunctional enzyme IspD/IspF; Bifunctional enzyme that catalyzes the formation of 4- diphosphocytidyl-2-C-methyl-D-erythritol from CTP and 2-C-methyl- D-erythritol 4-phosphate (MEP) (IspD), and catalyzes the conversion of 4-diphosphocytidyl-2-C-methyl-D-erythritol 2- phosphate (CDP-ME2P) to 2-C-methyl-D-erythritol 2,4- cyclodiphosphate (ME-CPP) with a corresponding release of cytidine 5-monophos…
ispH	1296990.H845_2107	4-hydroxy-3-methylbut-2-enyl diphosphate reductase; Catalyzes the conversion of 1-hydroxy-2-methyl-2-(E)- butenyl 4-diphosphate (HMBPP) into a mixture of isopentenyl diphosphate (IPP) and dimethylallyl diphosphate (DMAPP). Acts in the terminal step of the DOXP/MEP pathway for isoprenoid precursor biosynthesis; Belongs to the IspH family
kdsA	1296990.H845_1912	2-dehydro-3-deoxyphosphooctonate aldolase; Cytoplasmic; Belongs to the KdsA family
ksgA	1296990.H845_2164	Ribosomal RNA small subunit methyltransferase A; Specifically dimethylates two adjacent adenosines (A1518 and A1519) in the loop of a conserved hairpin near the 3'-end of 16S rRNA in the 30S particle. May play a critical role in biogenesis of 30S subunits
lepA	1296990.H845_2842	Elongation factor 4; Required for accurate and efficient protein synthesis under certain stress conditions. May act as a fidelity factor of the translation reaction, by catalyzing a one-codon backward translocation of tRNAs on improperly translocated ribosomes. Back- translocation proceeds from a post-translocation (POST) complex to a pre-translocation (PRE) complex, thus giving elongation factor…
lon	1296990.H845_2049	Lon protease; ATP-dependent serine protease that mediates the selective degradation of mutant and abnormal proteins as well as certain short-lived regulatory proteins. Required for cellular homeostasis and for survival from DNA damage and developmental changes induced by stress. Degrades polypeptides processively to yield small peptide fragments that are 5 to 10 amino acids long. Binds to DNA in …
lpxD	1296990.H845_529	UDP-3-O-acylglucosamine N-acyltransferase; Catalyzes the N-acylation of UDP-3-O-acylglucosamine using 3-hydroxyacyl-ACP as the acyl donor. Is involved in the biosynthesis of lipid A, a phosphorylated glycolipid that anchors the lipopolysaccharide to the outer membrane of the cell; Belongs to the transferase hexapeptide repeat family. LpxD subfamily
lysA	1296990.H845_879	Diaminopimelate decarboxylase; Specifically catalyzes the decarboxylation of meso- diaminopimelate (meso-DAP) to L-lysine
metG	1296990.H845_1825	Methionine--tRNA ligase; Is required not only for elongation of protein synthesis but also for the initiation of all mRNA translation through initiator tRNA(fMet) aminoacylation; Belongs to the class-I aminoacyl-tRNA synthetase family. MetG type 2B subfamily
mqo	1296990.H845_512	Probable malate:quinone oxidoreductase; [R] general function prediction only; [E] Amino acid transport and metabolism; [J] Translation, ribosomal structure and biogenesis; Cytoplasmic
mtnA	1296990.H845_460	Methylthioribose-1-phosphate isomerase; Catalyzes the interconversion of methylthioribose-1- phosphate (MTR-1-P) into methylthioribulose-1-phosphate (MTRu-1- P)
murE	1296990.H845_1974	UDP-N-acetylmuramoyl-L-alanyl-D-glutamate--2,6-diaminopimelate ligase; Catalyzes the addition of meso-diaminopimelic acid to the nucleotide precursor UDP-N-acetylmuramoyl-L-alanyl-D-glutamate (UMAG) in the biosynthesis of bacterial cell-wall peptidoglycan; Belongs to the MurCDEF family. MurE subfamily
parC	1296990.H845_1725	DNA topoisomerase 4 subunit A; Topoisomerase IV is essential for chromosome segregation. It relaxes supercoiled DNA. Performs the decatenation events required during the replication of a circular DNA molecule; Belongs to the type II topoisomerase GyrA/ParC subunit family. ParC type 1 subfamily
pdhA	1296990.H845_1901	Pyruvate dehydrogenase E1 component subunit alpha; The pyruvate dehydrogenase complex catalyzes the overall conversion of pyruvate to acetyl-CoA and CO(2)
pdxJ	1296990.H845_3079	Pyridoxine 5'-phosphate synthase; Catalyzes the complicated ring closure reaction between the two acyclic compounds 1-deoxy-D-xylulose-5-phosphate (DXP) and 3-amino-2-oxopropyl phosphate (1-amino-acetone-3-phosphate or AAP) to form pyridoxine 5'-phosphate (PNP) and inorganic phosphate
pepA	1296990.H845_2155	Probable cytosol aminopeptidase; Presumably involved in the processing and regular turnover of intracellular proteins. Catalyzes the removal of unsubstituted N-terminal amino acids from various peptides; Belongs to the peptidase M17 family
pgk	1296990.H845_401	Phosphoglycerate kinase; Cytoplasmic; Belongs to the phosphoglycerate kinase family
pheS	1296990.H845_1764	Phenylalanine--tRNA ligase alpha subunit; Cytoplasmic; Belongs to the class-II aminoacyl-tRNA synthetase family. Phe-tRNA synthetase alpha subunit type 1 subfamily
proA	1296990.H845_2796	Gamma-glutamyl phosphate reductase; Catalyzes the NADPH-dependent reduction of L-glutamate 5-phosphate into L-glutamate 5-semialdehyde and phosphate. The product spontaneously undergoes cyclization to form 1-pyrroline-5- carboxylate; Belongs to the gamma-glutamyl phosphate reductase family
proC	1296990.H845_2809	Pyrroline-5-carboxylate reductase; Catalyzes the reduction of 1-pyrroline-5-carboxylate (PCA) to L-proline
proS	1296990.H845_2030	Proline--tRNA ligase; Catalyzes the attachment of proline to tRNA(Pro) in a two-step reaction: proline is first activated by ATP to form Pro- AMP and then transferred to the acceptor end of tRNA(Pro); Belongs to the class-II aminoacyl-tRNA synthetase family. ProS type 2 subfamily
purC	1296990.H845_1888	Phosphoribosylaminoimidazole-succinocarboxamide synthase; Cytoplasmic; Belongs to the SAICAR synthetase family
purN	1296990.H845_626	Phosphoribosylglycinamide formyltransferase; Catalyzes the transfer of a formyl group from 10- formyltetrahydrofolate to 5-phospho-ribosyl-glycinamide (GAR), producing 5-phospho-ribosyl-N-formylglycinamide (FGAR) and tetrahydrofolate
queC	1296990.H845_894	7-cyano-7-deazaguanine synthase; Catalyzes the ATP-dependent conversion of 7-carboxy-7- deazaguanine (CDG) to 7-cyano-7-deazaguanine (preQ(0)); Belongs to the QueC family
rho	1296990.H845_3119	Transcription termination factor Rho; Facilitates transcription termination by a mechanism that involves Rho binding to the nascent RNA, activation of Rho's RNA-dependent ATPase activity, and release of the mRNA from the DNA template
rnc	1296990.H845_519	Ribonuclease 3; Digests double-stranded RNA. Involved in the processing of primary rRNA transcript to yield the immediate precursors to the large and small rRNAs (23S and 16S). Processes some mRNAs, and tRNAs when they are encoded in the rRNA operon. Processes pre- crRNA and tracrRNA of type II CRISPR loci if present in the organism
rpoD	1296990.H845_2170	RNA polymerase sigma factor RpoD; Sigma factors are initiation factors that promote the attachment of RNA polymerase to specific initiation sites and are then released. This sigma factor is the primary sigma factor during exponential growth
rsmG	1296990.H845_3114	Ribosomal RNA small subunit methyltransferase G; Specifically methylates the N7 position of guanine in position 527 of 16S rRNA
serS	1296990.H845_472	Serine--tRNA ligase; Catalyzes the attachment of serine to tRNA(Ser). Is also able to aminoacylate tRNA(Sec) with serine, to form the misacylated tRNA L-seryl-tRNA(Sec), which will be further converted into selenocysteinyl-tRNA(Sec)
thiE	1296990.H845_2881	Thiamine-phosphate synthase; Condenses 4-methyl-5-(beta-hydroxyethyl)thiazole monophosphate (THZ-P) and 2-methyl-4-amino-5-hydroxymethyl pyrimidine pyrophosphate (HMP-PP) to form thiamine monophosphate (TMP); Belongs to the thiamine-phosphate synthase family
tpiA	1296990.H845_1909	Triosephosphate isomerase; Involved in the gluconeogenesis. Catalyzes stereospecifically the conversion of dihydroxyacetone phosphate (DHAP) to D-glyceraldehyde-3-phosphate (G3P); Belongs to the triosephosphate isomerase family
trpA	1296990.H845_3125	Tryptophan synthase alpha chain; The alpha subunit is responsible for the aldol cleavage of indoleglycerol phosphate to indole and glyceraldehyde 3- phosphate; Belongs to the TrpA family
ubiE	1296990.H845_863	Ubiquinone/menaquinone biosynthesis C-methyltransferase UbiE; Methyltransferase required for the conversion of demethylmenaquinol (DMKH2) to menaquinol (MKH2) and the conversion of 2-polyprenyl-6-methoxy-1,4-benzoquinol (DDMQH2) to 2- polyprenyl-3-methyl-6-methoxy-1,4-benzoquinol (DMQH2)

## Sheet: INM_2
File S1. List of total proteins that compose each of the INM (Interaction network map), those with a PPI enrichment p-value < 0.05. The node code, the identifier, and annotated functions of network proteins based on the databases Uniprot (http://www.uniprot.org) and KEGG (https://www.genome.jp/kegg/) are included.
#Node	Identifier	Annotation
H845_1198	1296990.H845_1198	UPF0176 protein H845_1198; Cytoplasmic; Belongs to the UPF0176 family
H845_1235	1296990.H845_1235	Alanine racemase; Catalyzes the interconversion of L-alanine and D- alanine. May also act on other amino acids; Belongs to the alanine racemase family
H845_1239	1296990.H845_1239	Glycerol-3-phosphate dehydrogenase; [C] Energy production and conversion; [M] Cell wall/membrane/envelope biogenesis; [R] general function prediction only; [I] Lipid transport and metabolism; [E] Amino acid transport and metabolism; Cytoplasmic; Belongs to the FAD-dependent glycerol-3-phosphate dehydrogenase family
H845_1245	1296990.H845_1245	NADH dehydrogenase; CytoplasmicMembrane
H845_1309	1296990.H845_1309	Dehydrogenase; Cytoplasmic
H845_134	1296990.H845_134	Oxidoreductase; [C] Energy production and conversion; [R] general function prediction only; Cytoplasmic
H845_1352	1296990.H845_1352	D-isomer specific 2-hydroxyacid dehydrogenase NAD-binding protein; Cytoplasmic
H845_1364	1296990.H845_1364	Metal-dependent protein hydrolase; Cytoplasmic
H845_1449	1296990.H845_1449	Amidohydrolase; Cytoplasmic
H845_1459	1296990.H845_1459	N-acetylglucosamine-6-phosphate deacetylase; Cytoplasmic; Belongs to the metallo-dependent hydrolases superfamily. NagA family
H845_1496	1296990.H845_1496	NADH:flavin oxidoreductase/NADH oxidase; Cytoplasmic
H845_1579	1296990.H845_1579	annotation not available
H845_1669	1296990.H845_1669	Putative tyrosine decarboxylase; Cytoplasmic
H845_1677	1296990.H845_1677	UTP--glucose-1-phosphate uridylyltransferase; [G] Carbohydrate transport and metabolism; [V] Defense mechanisms; [M] Cell wall/membrane/envelope biogenesis; [P] Inorganic ion transport and metabolism; [T] Signal transduction mechanisms; Cytoplasmic
H845_1774	1296990.H845_1774	ROK family protein; Cytoplasmic
H845_1777	1296990.H845_1777	Polyprenyl synthetase; Cytoplasmic; Belongs to the FPP/GGPP synthase family
H845_1786	1296990.H845_1786	S-formylglutathione hydrolase; Serine hydrolase involved in the detoxification of formaldehyde
H845_1787	1296990.H845_1787	S-(hydroxymethyl)glutathione dehydrogenase; Cytoplasmic; Belongs to the zinc-containing alcohol dehydrogenase family. Class-III subfamily
H845_1800	1296990.H845_1800	Succinate CoA transferase; [H] Coenzyme transport and metabolism; [K] Transcription; [C] Energy production and conversion; [I] Lipid transport and metabolism; [E] Amino acid transport and metabolism; [J] Translation, ribosomal structure and biogenesis; Cytoplasmic
H845_1808	1296990.H845_1808	Polyprenyl synthetase; Cytoplasmic; Belongs to the FPP/GGPP synthase family
H845_1819	1296990.H845_1819	annotation not available
H845_1874	1296990.H845_1874	3-mercaptopyruvate sulfurtransferase; Cytoplasmic
H845_1898	1296990.H845_1898	Dihydrolipoyl dehydrogenase; Cytoplasmic
H845_1899	1296990.H845_1899	Acetyltransferase component of pyruvate dehydrogenase complex; The pyruvate dehydrogenase complex catalyzes the overall conversion of pyruvate to acetyl-CoA and CO(2)
H845_1905	1296990.H845_1905	Anthranilate synthase component II; Cytoplasmic
H845_1906	1296990.H845_1906	Anthranilate synthase component II; Cytoplasmic
H845_1961	1296990.H845_1961	annotation not available
H845_2023	1296990.H845_2023	DEAD/DEAH box helicase domain protein; Cytoplasmic; Belongs to the DEAD box helicase family
H845_2027	1296990.H845_2027	DNA-directed DNA polymerase; Cytoplasmic
H845_2061	1296990.H845_2061	Cysteine desulfurase; Cytoplasmic; Belongs to the class-V pyridoxal-phosphate-dependent aminotransferase family
H845_2062	1296990.H845_2062	FeS assembly protein SufD; Cytoplasmic
H845_2063	1296990.H845_2063	FeS assembly ATPase SufC; Cytoplasmic
H845_2064	1296990.H845_2064	Cysteine desulfurase activator complex subunit SufB; Cytoplasmic
H845_2089	1296990.H845_2089	Two component transcriptional regulator, winged helix family protein; Cytoplasmic
H845_2124	1296990.H845_2124	Radical SAM domain protein; [H] Coenzyme transport and metabolism; [O] Posttranslational modification, protein turnover, chaperones; [C] Energy production and conversion; [R] general function prediction only; [P] Inorganic ion transport and metabolism; [E] Amino acid transport and metabolism; Cytoplasmic
H845_2189	1296990.H845_2189	ATPase associated with various cellular activities AAA_3; Cytoplasmic
H845_2259	1296990.H845_2259	D-isomer specific 2-hydroxyacid dehydrogenase NAD-binding protein; Cytoplasmic; Belongs to the D-isomer specific 2-hydroxyacid dehydrogenase family
H845_2261	1296990.H845_2261	annotation not available
H845_2295	1296990.H845_2295	Dihydroorotate dehydrogenase (quinone); Catalyzes the conversion of dihydroorotate to orotate with quinone as electron acceptor; Belongs to the dihydroorotate dehydrogenase family. Type 2 subfamily
H845_2317	1296990.H845_2317	Radical S-adenosylmethionine (SAM) protein; [H] Coenzyme transport and metabolism; [O] Posttranslational modification, protein turnover, chaperones; [C] Energy production and conversion; [M] Cell wall/membrane/envelope biogenesis; [R] general function prediction only; [I] Lipid transport and metabolism; [J] Translation, ribosomal structure and biogenesis; Cytoplasmic
H845_2357	1296990.H845_2357	Squalene--hopene cyclase; CytoplasmicMembrane
H845_2484	1296990.H845_2484	Glutamate--tRNA ligase; Catalyzes the attachment of glutamate to tRNA(Glu) in a two-step reaction: glutamate is first activated by ATP to form Glu-AMP and then transferred to the acceptor end of tRNA(Glu); Belongs to the class-I aminoacyl-tRNA synthetase family. Glutamate--tRNA ligase type 1 subfamily
H845_2494	1296990.H845_2494	Cysteine synthase; Cytoplasmic
H845_2513	1296990.H845_2513	Chaperone protein; Cytoplasmic
H845_2528	1296990.H845_2528	annotation not available
H845_2532	1296990.H845_2532	Histidinol dehydrogenase; Catalyzes the sequential NAD-dependent oxidations of L- histidinol to L-histidinaldehyde and then to L-histidine
H845_2538	1296990.H845_2538	Dihydroorotase; Cytoplasmic
H845_2549	1296990.H845_2549	Homoserine dehydrogenase; Cytoplasmic
H845_2585	1296990.H845_2585	Peroxiredoxin; Cytoplasmic
H845_2587	1296990.H845_2587	Putative oxidoreductase; [O] Posttranslational modification, protein turnover, chaperones; [C] Energy production and conversion; [R] general function prediction only; [D] Cell cycle control, cell division, chromosome partitioning; [L] Replication, recombination and repair; [S] Function unknown; Periplasmic
H845_2621	1296990.H845_2621	Putative ABC transporter ATP-binding protein; [O] Posttranslational modification, protein turnover, chaperones; [V] Defense mechanisms; [Q] Secondary metabolites biosynthesis, transport and catabolism; [P] Inorganic ion transport and metabolism; [R] general function prediction only; [E] Amino acid transport and metabolism; CytoplasmicMembrane
H845_2629	1296990.H845_2629	Protease protein; [K] Transcription; [R] general function prediction only; [L] Replication, recombination and repair; Cytoplasmic
H845_2647	1296990.H845_2647	Cysteine synthase A; Cytoplasmic
H845_2651	1296990.H845_2651	Putative short-chain dehydrogenase; [O] Posttranslational modification, protein turnover, chaperones; [H] Coenzyme transport and metabolism; [V] Defense mechanisms; [R] general function prediction only; Cytoplasmic
H845_2653	1296990.H845_2653	Tetratricopeptide repeat family protein; CytoplasmicMembrane
H845_2657	1296990.H845_2657	Iron-sulfur (Fe-S) oxidoreductase; Cytoplasmic
H845_2661	1296990.H845_2661	Hopanoid biosynthesis associated radical SAM protein HpnJ; [H] Coenzyme transport and metabolism; [G] Carbohydrate transport and metabolism; [C] Energy production and conversion; [R] general function prediction only; [M] Cell wall/membrane/envelope biogenesis; [J] Translation, ribosomal structure and biogenesis; Cytoplasmic
H845_2668	1296990.H845_2668	Ferredoxin--NADP reductase; Cytoplasmic
H845_2669	1296990.H845_2669	D-amino acid dehydrogenase; Oxidative deamination of D-amino acids
H845_2672	1296990.H845_2672	PfkB domain protein; Cytoplasmic
H845_2721	1296990.H845_2721	2,5-diketo-D-gluconic acid reductase; [V] Defense mechanisms; [R] general function prediction only; [P] Inorganic ion transport and metabolism; [T] Signal transduction mechanisms; [E] Amino acid transport and metabolism; Cytoplasmic
H845_2722	1296990.H845_2722	[M] Cell wall/membrane/envelope biogenesis; [E] Amino acid transport and metabolism; [S] Function unknown; Cytoplasmic
H845_2803	1296990.H845_2803	annotation not available
H845_2836	1296990.H845_2836	Zinc-binding alcohol dehydrogenase family protein; Cytoplasmic
H845_2855	1296990.H845_2855	Uncharacterized protein; Cytoplasmic
H845_2869	1296990.H845_2869	Aminotransferase; Cytoplasmic
H845_2885	1296990.H845_2885	Inositol-1-monophosphatase; Cytoplasmic; Belongs to the inositol monophosphatase superfamily
H845_2892	1296990.H845_2892	Peroxiredoxin; Cytoplasmic
H845_2909	1296990.H845_2909	Transketolase; [K] Transcription; [G] Carbohydrate transport and metabolism; [Q] Secondary metabolites biosynthesis, transport and catabolism; [R] general function prediction only; Cytoplasmic; Belongs to the transketolase family
H845_2922	1296990.H845_2922	Mannitol 2-dehydrogenase; [H] Coenzyme transport and metabolism; [G] Carbohydrate transport and metabolism; [M] Cell wall/membrane/envelope biogenesis; [E] Amino acid transport and metabolism; Cytoplasmic; Belongs to the mannitol dehydrogenase family
H845_2927	1296990.H845_2927	Iron-sulfur cluster carrier protein; Binds and transfers iron-sulfur (Fe-S) clusters to target apoproteins. Can hydrolyze ATP
H845_2928	1296990.H845_2928	Heat shock protein DnaJ domain protein; CytoplasmicMembrane
H845_2936	1296990.H845_2936	Fumarate hydratase class I; Catalyzes the reversible hydration of fumarate to (S)- malate; Belongs to the class-I fumarase family
H845_2942	1296990.H845_2942	Putative ABC transporter ATP-binding protein; Cytoplasmic
H845_3012	1296990.H845_3012	Succinate dehydrogenase, hydrophobic membrane anchor protein; CytoplasmicMembrane
H845_3014	1296990.H845_3014	Succinate dehydrogenase iron-sulfur subunit; [G] Carbohydrate transport and metabolism; [C] Energy production and conversion; [R] general function prediction only; [P] Inorganic ion transport and metabolism; CytoplasmicMembrane; Belongs to the succinate dehydrogenase/fumarate reductase iron-sulfur protein family
H845_3018	1296990.H845_3018	Uncharacterized protein; Cytoplasmic
H845_3033	1296990.H845_3033	Aldo/keto reductase; Cytoplasmic
H845_3038	1296990.H845_3038	ATPase AAA-2 domain protein; [O] Posttranslational modification, protein turnover, chaperones; [R] general function prediction only; [M] Cell wall/membrane/envelope biogenesis; Cytoplasmic
H845_3060	1296990.H845_3060	Acetyl-CoA carboxylase biotin carboxylase subunit; Cytoplasmic
H845_3098	1296990.H845_3098	5,10-methylenetetrahydrofolate reductase; Cytoplasmic
H845_3109	1296990.H845_3109	Pseudouridine synthase; Cytoplasmic; Belongs to the pseudouridine synthase RsuA family
H845_3149	1296990.H845_3149	Transcriptional regulatory protein; [G] Carbohydrate transport and metabolism; [C] Energy production and conversion; [R] general function prediction only; [P] Inorganic ion transport and metabolism; [T] Signal transduction mechanisms; Cytoplasmic
H845_3226	1296990.H845_3226	Squalene synthase HpnC; Cytoplasmic
H845_3227	1296990.H845_3227	Putative phytoene synthase; Cytoplasmic
H845_3228	1296990.H845_3228	Squalene-associated FAD-dependent desaturase; [H] Coenzyme transport and metabolism; [O] Posttranslational modification, protein turnover, chaperones; [G] Carbohydrate transport and metabolism; [Q] Secondary metabolites biosynthesis, transport and catabolism; [M] Cell wall/membrane/envelope biogenesis; [T] Signal transduction mechanisms; [S] Function unknown; Cytoplasmic
H845_3412	1296990.H845_3412	Acetyl-CoA synthetase; Cytoplasmic
H845_3416	1296990.H845_3416	Selenophosphate synthetase; CytoplasmicMembrane
H845_3467	1296990.H845_3467	Aldo/keto reductase; [R] general function prediction only; [K] Transcription; [C] Energy production and conversion; [L] Replication, recombination and repair; [S] Function unknown; Cytoplasmic
H845_3518	1296990.H845_3518	annotation not available
H845_354	1296990.H845_354	Proline iminopeptidase; Cytoplasmic; Belongs to the peptidase S33 family
H845_3553	1296990.H845_3553	Uncharacterized protein; Cytoplasmic
H845_366	1296990.H845_366	Cell shape determining protein, MreB/Mrl family; Cytoplasmic
H845_377	1296990.H845_377	Phosphogluconate dehydratase; Cytoplasmic; Belongs to the IlvD/Edd family
H845_418	1296990.H845_418	Glutathione S-transferase; Cytoplasmic
H845_427	1296990.H845_427	Signal transduction histidine kinase, nitrogen specific, NtrB; [R] general function prediction only; [M] Cell wall/membrane/envelope biogenesis; [T] Signal transduction mechanisms; CytoplasmicMembrane
H845_437	1296990.H845_437	Inositol-1-monophosphatase; Cytoplasmic; Belongs to the inositol monophosphatase superfamily
H845_503	1296990.H845_503	Rieske (2Fe-2S) domain protein; Cytoplasmic
H845_508	1296990.H845_508	Superoxide dismutase; Destroys radicals which are normally produced within the cells and which are toxic to biological systems
H845_510	1296990.H845_510	6-phosphogluconate dehydrogenase NAD-binding protein; Cytoplasmic
H845_531	1296990.H845_531	Acyl-[acyl-carrier-protein]--UDP-N-acetylglucosamine O-acyltransferase; Involved in the biosynthesis of lipid A, a phosphorylated glycolipid that anchors the lipopolysaccharide to the outer membrane of the cell
H845_549	1296990.H845_549	ABC transporter ATP-binding protein; Cytoplasmic
H845_558	1296990.H845_558	Oligoendopeptidase F; Cytoplasmic
H845_564	1296990.H845_564	Phosphatidylethanolamine N-methyltransferase; [H] Coenzyme transport and metabolism; [R] general function prediction only; [M] Cell wall/membrane/envelope biogenesis; [P] Inorganic ion transport and metabolism; [J] Translation, ribosomal structure and biogenesis; [S] Function unknown; Cytoplasmic
H845_569	1296990.H845_569	Peptidase U62 modulator of DNA gyrase; CytoplasmicMembrane
H845_570	1296990.H845_570	Processing peptidase; Cytoplasmic; Belongs to the peptidase M16 family
H845_572	1296990.H845_572	annotation not available
H845_593	1296990.H845_593	Carboxymethylenebutenolidase; [C] Energy production and conversion; [Q] Secondary metabolites biosynthesis, transport and catabolism; [R] general function prediction only; [E] Amino acid transport and metabolism; [L] Replication, recombination and repair; Cytoplasmic
H845_607	1296990.H845_607	Ubiquinol oxidase subunit 2; [C] Energy production and conversion; [J] Translation, ribosomal structure and biogenesis; [L] Replication, recombination and repair; CytoplasmicMembrane
H845_611	1296990.H845_611	Ferredoxin; Ferredoxins are iron-sulfur proteins that transfer electrons in a wide variety of metabolic reactions
H845_619	1296990.H845_619	Putative aminotransferase protein; Cytoplasmic; Belongs to the DegT/DnrJ/EryC1 family
H845_638	1296990.H845_638	Putative glutamyl-tRNA(Gln) amidotransferase subunit A; Cytoplasmic
H845_641	1296990.H845_641	Serine--pyruvate transaminase; Cytoplasmic
H845_645	1296990.H845_645	Isocitrate dehydrogenase (NAD(+)); [G] Carbohydrate transport and metabolism; [F] Nucleotide transport and metabolism; [C] Energy production and conversion; [R] general function prediction only; [M] Cell wall/membrane/envelope biogenesis; Cytoplasmic
H845_648	1296990.H845_648	Ribosomal protein L11 methyltransferase; Cytoplasmic
H845_673	1296990.H845_673	ABC transporter, CydDC cysteine exporter (CydDC-E) family, permease/ATP-binding protein CydC; CytoplasmicMembrane
H845_873	1296990.H845_873	Thiamine biosynthesis oxidoreductase ThiO; [H] Coenzyme transport and metabolism; [G] Carbohydrate transport and metabolism; [R] general function prediction only; [E] Amino acid transport and metabolism; [L] Replication, recombination and repair; [S] Function unknown; Cytoplasmic
H845_884	1296990.H845_884	Shikimate dehydrogenase (NADP(+)); Involved in the biosynthesis of the chorismate, which leads to the biosynthesis of aromatic amino acids. Catalyzes the reversible NADPH linked reduction of 3-dehydroshikimate (DHSA) to yield shikimate (SA)
H845_902	1296990.H845_902	Methyltransferase; [H] Coenzyme transport and metabolism; [V] Defense mechanisms; [R] general function prediction only; [M] Cell wall/membrane/envelope biogenesis; [T] Signal transduction mechanisms; [J] Translation, ribosomal structure and biogenesis; [L] Replication, recombination and repair; Cytoplasmic
H845_904	1296990.H845_904	Malonyl CoA-acyl carrier protein transacylase; Cytoplasmic
H845_905	1296990.H845_905	3-oxoacyl-[acyl-carrier-protein] reductase; Cytoplasmic
H845_907	1296990.H845_907	3-oxoacyl-[acyl-carrier-protein] synthase 2; Catalyzes the condensation reaction of fatty acid synthesis by the addition to an acyl acceptor of two carbons from malonyl-ACP
accA	1296990.H845_499	Acetyl-coenzyme A carboxylase carboxyl transferase subunit alpha; Component of the acetyl coenzyme A carboxylase (ACC) complex. First, biotin carboxylase catalyzes the carboxylation of biotin on its carrier protein (BCCP) and then the CO(2) group is transferred by the carboxyltransferase to acetyl-CoA to form malonyl-CoA
accD	1296990.H845_3126	Acetyl-coenzyme A carboxylase carboxyl transferase subunit beta; Component of the acetyl coenzyme A carboxylase (ACC) complex. Biotin carboxylase (BC) catalyzes the carboxylation of biotin on its carrier protein (BCCP) and then the CO(2) group is transferred by the transcarboxylase to acetyl-CoA to form malonyl- CoA; Belongs to the AccD/PCCB family
ackA	1296990.H845_1	Acetate kinase; Catalyzes the formation of acetyl phosphate from acetate and ATP. Can also catalyze the reverse reaction; Belongs to the acetokinase family
ahcY	1296990.H845_2723	Adenosylhomocysteinase; May play a key role in the regulation of the intracellular concentration of adenosylhomocysteine
argB	1296990.H845_539	Acetylglutamate kinase; Catalyzes the ATP-dependent phosphorylation of N-acetyl- L-glutamate; Belongs to the acetylglutamate kinase family. ArgB subfamily
argD	1296990.H845_2510	Acetylornithine aminotransferase; [H] Coenzyme transport and metabolism; [T] Signal transduction mechanisms; [E] Amino acid transport and metabolism; Cytoplasmic
argH	1296990.H845_882	Argininosuccinate lyase; Cytoplasmic
argS	1296990.H845_466	Arginine--tRNA ligase; [O] Posttranslational modification, protein turnover, chaperones; [U] Intracellular trafficking, secretion, and vesicular transport; [R] general function prediction only; [J] Translation, ribosomal structure and biogenesis; [E] Amino acid transport and metabolism; Cytoplasmic
aroA	1296990.H845_2277	3-phosphoshikimate 1-carboxyvinyltransferase; Catalyzes the transfer of the enolpyruvyl moiety of phosphoenolpyruvate (PEP) to the 5-hydroxyl of shikimate-3- phosphate (S3P) to produce enolpyruvyl shikimate-3-phosphate and inorganic phosphate
carA	1296990.H845_2173	Carbamoyl-phosphate synthase small chain; Cytoplasmic; Belongs to the CarA family
coaE	1296990.H845_885	Dephospho-CoA kinase; Catalyzes the phosphorylation of the 3'-hydroxyl group of dephosphocoenzyme A to form coenzyme A; Belongs to the CoaE family
cysS	1296990.H845_482	Cysteine--tRNA ligase; [O] Posttranslational modification, protein turnover, chaperones; [F] Nucleotide transport and metabolism; [C] Energy production and conversion; [J] Translation, ribosomal structure and biogenesis; [E] Amino acid transport and metabolism; Cytoplasmic; Belongs to the class-I aminoacyl-tRNA synthetase family
dapB	1296990.H845_3145	4-hydroxy-tetrahydrodipicolinate reductase; Catalyzes the conversion of 4-hydroxy- tetrahydrodipicolinate (HTPA) to tetrahydrodipicolinate
dapD	1296990.H845_540	2,3,4,5-tetrahydropyridine-2,6-dicarboxylate N-succinyltransferase; [R] general function prediction only; [M] Cell wall/membrane/envelope biogenesis; [E] Amino acid transport and metabolism; [S] Function unknown; Cytoplasmic; Belongs to the transferase hexapeptide repeat family
dapE	1296990.H845_541	Succinyl-diaminopimelate desuccinylase; Catalyzes the hydrolysis of N-succinyl-L,L- diaminopimelic acid (SDAP), forming succinate and LL-2,6- diaminoheptanedioate (DAP), an intermediate involved in the bacterial biosynthesis of lysine and meso-diaminopimelic acid, an essential component of bacterial cell walls; Belongs to the peptidase M20A family. DapE subfamily
ddl	1296990.H845_1982	D-alanine--D-alanine ligase; Cell wall formation; Belongs to the D-alanine--D-alanine ligase family
dnaA	1296990.H845_866	Chromosomal replication initiator protein DnaA; Plays an important role in the initiation and regulation of chromosomal replication. Binds to the origin of replication; it binds specifically double-stranded DNA at a 9 bp consensus (dnaA box): 5'-TTATC[CA]A[CA]A-3'. DnaA binds to ATP and to acidic phospholipids
dnaJ	1296990.H845_3146	Chaperone protein DnaJ; Participates actively in the response to hyperosmotic and heat shock by preventing the aggregation of stress-denatured proteins and by disaggregating proteins, also in an autonomous, DnaK-independent fashion. Unfolded proteins bind initially to DnaJ; upon interaction with the DnaJ-bound protein, DnaK hydrolyzes its bound ATP, resulting in the formation of a stable complex.…
dnaX	1296990.H845_2283	DNA polymerase III subunit gamma/tau; DNA polymerase III is a complex, multichain enzyme responsible for most of the replicative synthesis in bacteria. This DNA polymerase also exhibits 3' to 5' exonuclease activity
dxr	1296990.H845_525	1-deoxy-D-xylulose 5-phosphate reductoisomerase; Catalyzes the NADP-dependent rearrangement and reduction of 1-deoxy-D-xylulose-5-phosphate (DXP) to 2-C-methyl-D-erythritol 4-phosphate (MEP); Belongs to the DXR family
era	1296990.H845_520	GTPase Era; An essential GTPase that binds both GDP and GTP, with rapid nucleotide exchange. Plays a role in 16S rRNA processing and 30S ribosomal subunit biogenesis and possibly also in cell cycle regulation and energy metabolism
folE	1296990.H845_2628	GTP cyclohydrolase 1; Cytoplasmic
ftsH	1296990.H845_2600	ATP-dependent zinc metalloprotease FtsH; Acts as a processive, ATP-dependent zinc metallopeptidase for both cytoplasmic and membrane proteins. Plays a role in the quality control of integral membrane proteins; Belongs to the AAA ATPase family
gidA	1296990.H845_3115	tRNA uridine 5-carboxymethylaminomethyl modification enzyme MnmG; NAD-binding protein involved in the addition of a carboxymethylaminomethyl (cmnm) group at the wobble position (U34) of certain tRNAs, forming tRNA-cmnm(5)s(2)U34; Belongs to the MnmG family
glmM	1296990.H845_2598	Phosphoglucosamine mutase; Catalyzes the conversion of glucosamine-6-phosphate to glucosamine-1-phosphate; Belongs to the phosphohexose mutase family
glmS	1296990.H845_872	Glutamine--fructose-6-phosphate aminotransferase [isomerizing]; Catalyzes the first step in hexosamine metabolism, converting fructose-6P into glucosamine-6P using glutamine as a nitrogen source
hemF	1296990.H845_590	Oxygen-dependent coproporphyrinogen-III oxidase; Involved in the heme biosynthesis. Catalyzes the aerobic oxidative decarboxylation of propionate groups of rings A and B of coproporphyrinogen-III to yield the vinyl groups in protoporphyrinogen-IX
hisB	1296990.H845_2474	Imidazoleglycerol-phosphate dehydratase; Cytoplasmic
hisZ	1296990.H845_442	ATP phosphoribosyltransferase regulatory subunit; Required for the first step of histidine biosynthesis. May allow the feedback regulation of ATP phosphoribosyltransferase activity by histidine
ilvC	1296990.H845_41	Ketol-acid reductoisomerase (NADP(+)); Involved in the biosynthesis of branched-chain amino acids (BCAA). Catalyzes an alkyl-migration followed by a ketol- acid reduction of (S)-2-acetolactate (S2AL) to yield (R)-2,3- dihydroxy-isovalerate. In the isomerase reaction, S2AL is rearranged via a Mg-dependent methyl migration to produce 3- hydroxy-3-methyl-2-ketobutyrate (HMKB). In the reductase react…
ispG	1296990.H845_1691	4-hydroxy-3-methylbut-2-en-1-yl diphosphate synthase (flavodoxin); Converts 2C-methyl-D-erythritol 2,4-cyclodiphosphate (ME-2,4cPP) into 1-hydroxy-2-methyl-2-(E)-butenyl 4-diphosphate; Belongs to the IspG family
leuA	1296990.H845_364	2-isopropylmalate synthase; Catalyzes the condensation of the acetyl group of acetyl-CoA with 3-methyl-2-oxobutanoate (2-oxoisovalerate) to form 3-carboxy-3-hydroxy-4-methylpentanoate (2-isopropylmalate); Belongs to the alpha-IPM synthase/homocitrate synthase family. LeuA type 1 subfamily
leuB	1296990.H845_2090	3-isopropylmalate dehydrogenase; Catalyzes the oxidation of 3-carboxy-2-hydroxy-4- methylpentanoate (3-isopropylmalate) to 3-carboxy-4-methyl-2- oxopentanoate. The product decarboxylates to 4-methyl-2 oxopentanoate
leuD	1296990.H845_2091	3-isopropylmalate dehydratase small subunit; Catalyzes the isomerization between 2-isopropylmalate and 3-isopropylmalate, via the formation of 2-isopropylmaleate; Belongs to the LeuD family. LeuD type 1 subfamily
leuS	1296990.H845_317	Leucine--tRNA ligase; Cytoplasmic; Belongs to the class-I aminoacyl-tRNA synthetase family
lysS	1296990.H845_598	Lysine--tRNA ligase; Cytoplasmic; Belongs to the class-I aminoacyl-tRNA synthetase family
map	1296990.H845_2285	Methionine aminopeptidase; Cytoplasmic
metK	1296990.H845_3144	S-adenosylmethionine synthase; Catalyzes the formation of S-adenosylmethionine (AdoMet) from methionine and ATP. The overall synthetic reaction is composed of two sequential steps, AdoMet formation and the subsequent tripolyphosphate hydrolysis which occurs prior to release of AdoMet from the enzyme
murA	1296990.H845_2530	UDP-N-acetylglucosamine 1-carboxyvinyltransferase; Cell wall formation. Adds enolpyruvyl to UDP-N- acetylglucosamine; Belongs to the EPSP synthase family. MurA subfamily
murB	1296990.H845_1981	UDP-N-acetylenolpyruvoylglucosamine reductase; Cell wall formation
murC	1296990.H845_1980	UDP-N-acetylmuramate--L-alanine ligase; Cell wall formation; Belongs to the MurCDEF family
nnrD	1296990.H845_2054	Multifunctional fusion protein; Bifunctional enzyme that catalyzes the epimerization of the S- and R-forms of NAD(P)HX and the dehydration of the S-form of NAD(P)HX at the expense of ADP, which is converted to AMP. This allows the repair of both epimers of NAD(P)HX, a damaged form of NAD(P)H that is a result of enzymatic or heat-dependent hydration; Belongs to the NnrD/CARKD family
parE	1296990.H845_2498	DNA topoisomerase 4 subunit B; Topoisomerase IV is essential for chromosome segregation. It relaxes supercoiled DNA. Performs the decatenation events required during the replication of a circular DNA molecule; Belongs to the type II topoisomerase family. ParE type 1 subfamily
pqqE	1296990.H845_3151	Coenzyme PQQ synthesis protein E; [O] Posttranslational modification, protein turnover, chaperones; [H] Coenzyme transport and metabolism; [R] general function prediction only; [S] Function unknown; Cytoplasmic
prs	1296990.H845_2801	Ribose-phosphate pyrophosphokinase; Involved in the biosynthesis of the central metabolite phospho-alpha-D-ribosyl-1-pyrophosphate (PRPP) via the transfer of pyrophosphoryl group from ATP to 1-hydroxyl of ribose-5-phosphate (Rib-5-P); Belongs to the ribose-phosphate pyrophosphokinase family. Class I subfamily
pth	1296990.H845_2798	Peptidyl-tRNA hydrolase; The natural substrate for this enzyme may be peptidyl- tRNAs which drop off the ribosome during protein synthesis; Belongs to the PTH family
purA	1296990.H845_443	Adenylosuccinate synthetase; Plays an important role in the de novo pathway of purine nucleotide biosynthesis. Catalyzes the first committed step in the biosynthesis of AMP from IMP; Belongs to the adenylosuccinate synthetase family
purF	1296990.H845_2955	Amidophosphoribosyltransferase; Catalyzes the formation of phosphoribosylamine from phosphoribosylpyrophosphate (PRPP) and glutamine
purL	1296990.H845_1884	Phosphoribosylformylglycinamidine synthase subunit PurL; Part of the phosphoribosylformylglycinamidine synthase complex involved in the purines biosynthetic pathway. Catalyzes the ATP-dependent conversion of formylglycinamide ribonucleotide (FGAR) and glutamine to yield formylglycinamidine ribonucleotide (FGAM) and glutamate. The FGAM synthase complex is composed of three subunits. PurQ produces …
purM	1296990.H845_627	Phosphoribosylformylglycinamidine cyclo-ligase; Cytoplasmic
purQ	1296990.H845_1885	Phosphoribosylformylglycinamidine synthase subunit PurQ; Part of the phosphoribosylformylglycinamidine synthase complex involved in the purines biosynthetic pathway. Catalyzes the ATP-dependent conversion of formylglycinamide ribonucleotide (FGAR) and glutamine to yield formylglycinamidine ribonucleotide (FGAM) and glutamate. The FGAM synthase complex is composed of three subunits. PurQ produces …
pyrB	1296990.H845_2485	Aspartate carbamoyltransferase; Cytoplasmic; Belongs to the ATCase/OTCase family
pyrE	1296990.H845_1806	Orotate phosphoribosyltransferase; Catalyzes the transfer of a ribosyl phosphate group from 5-phosphoribose 1-diphosphate to orotate, leading to the formation of orotidine monophosphate (OMP)
pyrF	1296990.H845_3074	Orotidine 5'-phosphate decarboxylase; Catalyzes the decarboxylation of orotidine 5'- monophosphate (OMP) to uridine 5'-monophosphate (UMP); Belongs to the OMP decarboxylase family. Type 1 subfamily
pyrG	1296990.H845_1911	CTP synthase; Catalyzes the ATP-dependent amination of UTP to CTP with either L-glutamine or ammonia as the source of nitrogen. Regulates intracellular CTP levels through interactions with the four ribonucleotide triphosphates
pyrH	1296990.H845_521	Uridylate kinase; Catalyzes the reversible phosphorylation of UMP to UDP
recA	1296990.H845_409	Protein RecA; Can catalyze the hydrolysis of ATP in the presence of single-stranded DNA, the ATP-dependent uptake of single-stranded DNA by duplex DNA, and the ATP-dependent hybridization of homologous single-stranded DNAs. It interacts with LexA causing its activation and leading to its autocatalytic cleavage
rnd	1296990.H845_2675	Ribonuclease D; Exonuclease involved in the 3' processing of various precursor tRNAs. Initiates hydrolysis at the 3'-terminus of an RNA molecule and releases 5'-mononucleotides; Belongs to the RNase D family
rplB	1296990.H845_2230	50S ribosomal protein L2; One of the primary rRNA binding proteins. Required for association of the 30S and 50S subunits to form the 70S ribosome, for tRNA binding and peptide bond formation. It has been suggested to have peptidyltransferase activity; this is somewhat controversial. Makes several contacts with the 16S rRNA in the 70S ribosome
rplE	1296990.H845_2221	50S ribosomal protein L5; This is 1 of the proteins that binds and probably mediates the attachment of the 5S RNA into the large ribosomal subunit, where it forms part of the central protuberance. In the 70S ribosome it contacts protein S13 of the 30S subunit (bridge B1b), connecting the 2 subunits; this bridge is implicated in subunit movement. Contacts the P site tRNA; the 5S rRNA and some of i…
rplM	1296990.H845_2865	50S ribosomal protein L13; This protein is one of the early assembly proteins of the 50S ribosomal subunit, although it is not seen to bind rRNA by itself. It is important during the early stages of 50S assembly
rpsB	1296990.H845_1728	30S ribosomal protein S2; Cytoplasmic; Belongs to the universal ribosomal protein uS2 family
sucC	1296990.H845_898	Succinate--CoA ligase [ADP-forming] subunit beta; Succinyl-CoA synthetase functions in the citric acid cycle (TCA), coupling the hydrolysis of succinyl-CoA to the synthesis of either ATP or GTP and thus represents the only step of substrate-level phosphorylation in the TCA. The beta subunit provides nucleotide specificity of the enzyme and binds the substrate succinate, while the binding sites fo…
sucD	1296990.H845_897	Succinate--CoA ligase [ADP-forming] subunit alpha; Succinyl-CoA synthetase functions in the citric acid cycle (TCA), coupling the hydrolysis of succinyl-CoA to the synthesis of either ATP or GTP and thus represents the only step of substrate-level phosphorylation in the TCA. The alpha subunit of the enzyme binds the substrates coenzyme A and phosphate, while succinate binding and nucleotide speci…
thyX	1296990.H845_2938	Flavin-dependent thymidylate synthase; Catalyzes the reductive methylation of 2'-deoxyuridine- 5'-monophosphate (dUMP) to 2'-deoxythymidine-5'-monophosphate (dTMP) while utilizing 5,10-methylenetetrahydrofolate (mTHF) as the methyl donor, and NADPH and FADH(2) as the reductant
trpB	1296990.H845_3124	Tryptophan synthase beta chain; The beta subunit is responsible for the synthesis of L- tryptophan from indole and L-serine
trpC	1296990.H845_1903	Indole-3-glycerol phosphate synthase; Cytoplasmic; Belongs to the TrpC family
trpD	1296990.H845_1904	Anthranilate phosphoribosyltransferase; Catalyzes the transfer of the phosphoribosyl group of 5- phosphorylribose-1-pyrophosphate (PRPP) to anthranilate to yield N-(5'-phosphoribosyl)-anthranilate (PRA)
trpE	1296990.H845_1907	Anthranilate synthase component 1; Part of a heterotetrameric complex that catalyzes the two-step biosynthesis of anthranilate, an intermediate in the biosynthesis of L-tryptophan. In the first step, the glutamine- binding beta subunit (TrpG) of anthranilate synthase (AS) provides the glutamine amidotransferase activity which generates ammonia as a substrate that, along with chorismate, is used i…
trpF	1296990.H845_3073	annotation not available
trpS	1296990.H845_1784	Tryptophan--tRNA ligase; Cytoplasmic
tuf	1296990.H845_2235	Elongation factor Tu; This protein promotes the GTP-dependent binding of aminoacyl-tRNA to the A-site of ribosomes during protein biosynthesis
ubiG	1296990.H845_1687	Ubiquinone biosynthesis O-methyltransferase; O-methyltransferase that catalyzes the 2 O-methylation steps in the ubiquinone biosynthetic pathway; Belongs to the methyltransferase superfamily. UbiG/COQ3 family
ychF	1296990.H845_2797	Ribosome-binding ATPase YchF; ATPase that binds to both the 70S ribosome and the 50S ribosomal subunit in a nucleotide-independent manner

## Sheet: INM_4
File S1. List of total proteins that compose each of the INM (Interaction network map), those with a PPI enrichment p-value < 0.05. The node code, the identifier, and annotated functions of network proteins based on the databases Uniprot (http://www.uniprot.org) and KEGG (https://www.genome.jp/kegg/) are included.
#Node	Identifier	Annotation
H845_10	1296990.H845_10	Transcriptional regulator, LysR family protein; Cytoplasmic
H845_1087	1296990.H845_1087	annotation not available
H845_11	1296990.H845_11	Amidinotransferase; Cytoplasmic
H845_1129	1296990.H845_1129	Hydroxydechloroatrazine ethylaminohydrolase; Cytoplasmic
H845_1133	1296990.H845_1133	Histidinol dehydrogenase; Catalyzes the sequential NAD-dependent oxidations of L- histidinol to L-histidinaldehyde and then to L-histidine
H845_1139	1296990.H845_1139	Uncharacterized protein; [K] Transcription; [R] general function prediction only; [J] Translation, ribosomal structure and biogenesis; [S] Function unknown
H845_1146	1296990.H845_1146	Urocanate hydratase; Catalyzes the conversion of urocanate to 4-imidazolone- 5-propionate
H845_1152	1296990.H845_1152	Histidinol-phosphate aminotransferase; [H] Coenzyme transport and metabolism; [P] Inorganic ion transport and metabolism; [E] Amino acid transport and metabolism; [S] Function unknown; Cytoplasmic; Belongs to the class-II pyridoxal-phosphate-dependent aminotransferase family. Histidinol-phosphate aminotransferase subfamily
H845_1157	1296990.H845_1157	Aldehyde dehydrogenase; [G] Carbohydrate transport and metabolism; [C] Energy production and conversion; Cytoplasmic
H845_1160	1296990.H845_1160	Beta alanine--pyruvate transaminase; Cytoplasmic; Belongs to the class-III pyridoxal-phosphate-dependent aminotransferase family
H845_1168	1296990.H845_1168	Aldehyde dehydrogenase large subunit; CytoplasmicMembrane
H845_1211	1296990.H845_1211	Nicotinate-nucleotide pyrophosphorylase (Carboxylating); Cytoplasmic; Belongs to the NadC/ModD family
H845_1216	1296990.H845_1216	Transcriptional regulator MocR family; Cytoplasmic; Belongs to the class-III pyridoxal-phosphate-dependent aminotransferase family
H845_1228	1296990.H845_1228	NAD-dependent malic enzyme; Cytoplasmic
H845_1261	1296990.H845_1261	Bacterioferritin; [K] Transcription; [U] Intracellular trafficking, secretion, and vesicular transport; [P] Inorganic ion transport and metabolism; [M] Cell wall/membrane/envelope biogenesis; [R] general function prediction only; [S] Function unknown; Cytoplasmic; Belongs to the bacterioferritin family
H845_1285	1296990.H845_1285	Amine oxidase, flavin-containing; [G] Carbohydrate transport and metabolism; [I] Lipid transport and metabolism; [E] Amino acid transport and metabolism; [S] Function unknown; Cytoplasmic
H845_1342	1296990.H845_1342	Alkyl hydroperoxide reductase subunit C; [O] Posttranslational modification, protein turnover, chaperones; [K] Transcription; [G] Carbohydrate transport and metabolism; [R] general function prediction only; [P] Inorganic ion transport and metabolism; [E] Amino acid transport and metabolism; Cytoplasmic
H845_1417	1296990.H845_1417	Ribonucleoside-diphosphate reductase subunit beta; Provides the precursors necessary for DNA synthesis. Catalyzes the biosynthesis of deoxyribonucleotides from the corresponding ribonucleotides; Belongs to the ribonucleoside diphosphate reductase small chain family
H845_1504	1296990.H845_1504	annotation not available
H845_1748	1296990.H845_1748	Glutamate--cysteine ligase; Cytoplasmic
H845_1758	1296990.H845_1758	Folate-binding protein YgfZ; Cytoplasmic; Belongs to the GcvT family
H845_1778	1296990.H845_1778	1-deoxy-D-xylulose-5-phosphate synthase; Catalyzes the acyloin condensation reaction between C atoms 2 and 3 of pyruvate and glyceraldehyde 3-phosphate to yield 1-deoxy-D-xylulose-5-phosphate (DXP); Belongs to the transketolase family. DXPS subfamily
H845_1801	1296990.H845_1801	annotation not available
H845_1804	1296990.H845_1804	Citrate synthase; Cytoplasmic; Belongs to the citrate synthase family
H845_1826	1296990.H845_1826	DNA-directed DNA polymerase; [O] Posttranslational modification, protein turnover, chaperones; [G] Carbohydrate transport and metabolism; [M] Cell wall/membrane/envelope biogenesis; [I] Lipid transport and metabolism; [L] Replication, recombination and repair; Cytoplasmic
H845_1862	1296990.H845_1862	Uncharacterized protein; Cytoplasmic
H845_1896	1296990.H845_1896	Cyclase/dehydrase; [O] Posttranslational modification, protein turnover, chaperones; [G] Carbohydrate transport and metabolism; [M] Cell wall/membrane/envelope biogenesis; [I] Lipid transport and metabolism; [E] Amino acid transport and metabolism; [D] Cell cycle control, cell division, chromosome partitioning; [L] Replication, recombination and repair
H845_1899	1296990.H845_1899	Acetyltransferase component of pyruvate dehydrogenase complex; The pyruvate dehydrogenase complex catalyzes the overall conversion of pyruvate to acetyl-CoA and CO(2)
H845_2031	1296990.H845_2031	RNA-metabolising metallo-beta-lactamase protein; [O] Posttranslational modification, protein turnover, chaperones; [R] general function prediction only; [M] Cell wall/membrane/envelope biogenesis; [P] Inorganic ion transport and metabolism; [J] Translation, ribosomal structure and biogenesis; [L] Replication, recombination and repair; Cytoplasmic
H845_2056	1296990.H845_2056	DEAD/DEAH box helicase domain protein; Cytoplasmic; Belongs to the DEAD box helicase family
H845_2062	1296990.H845_2062	FeS assembly protein SufD; Cytoplasmic
H845_2117	1296990.H845_2117	Uncharacterized protein; Cytoplasmic
H845_2129	1296990.H845_2129	PAS/PAC sensor hybrid histidine kinase; CytoplasmicMembrane
H845_2163	1296990.H845_2163	Chaperone SurA; Periplasmic
H845_2273	1296990.H845_2273	Beta-lactamase; CytoplasmicMembrane
H845_2275	1296990.H845_2275	30S ribosomal protein S1; Binds mRNA; thus facilitating recognition of the initiation point. It is needed to translate mRNA with a short Shine-Dalgarno (SD) purine-rich sequence
H845_2319	1296990.H845_2319	Pyruvate, phosphate dikinase; [K] Transcription; [O] Posttranslational modification, protein turnover, chaperones; [G] Carbohydrate transport and metabolism; [T] Signal transduction mechanisms; Cytoplasmic; Belongs to the PEP-utilizing enzyme family
H845_2330	1296990.H845_2330	Sorbitol dehydrogenase cytochrome c subunit; CytoplasmicMembrane
H845_2550	1296990.H845_2550	Single-stranded-DNA-specific exonuclease RecJ; CytoplasmicMembrane
H845_2636	1296990.H845_2636	Thiamine pyrophosphate binding domain-containing protein; Cytoplasmic; Belongs to the TPP enzyme family
H845_2638	1296990.H845_2638	Acetolactate synthase; Cytoplasmic; Belongs to the TPP enzyme family
H845_2639	1296990.H845_2639	Alpha-acetolactate decarboxylase; Cytoplasmic; Belongs to the alpha-acetolactate decarboxylase family
H845_2665	1296990.H845_2665	Nuclease; [K] Transcription; [M] Cell wall/membrane/envelope biogenesis; [P] Inorganic ion transport and metabolism; [R] general function prediction only; [L] Replication, recombination and repair; CytoplasmicMembrane
H845_2701	1296990.H845_2701	Nitrogen regulatory protein P-II; [O] Posttranslational modification, protein turnover, chaperones; [R] general function prediction only; [E] Amino acid transport and metabolism; [S] Function unknown; CytoplasmicMembrane; Belongs to the P(II) protein family
H845_2760	1296990.H845_2760	Mannose-6-phosphate isomerase; [H] Coenzyme transport and metabolism; [K] Transcription; [G] Carbohydrate transport and metabolism; [M] Cell wall/membrane/envelope biogenesis; [S] Function unknown; Belongs to the mannose-6-phosphate isomerase type 2 family
H845_2789	1296990.H845_2789	Xanthine dehydrogenase accessory factor CoxI; Cytoplasmic
H845_2800	1296990.H845_2800	Phosphoglycerate mutase; Cytoplasmic
H845_2819	1296990.H845_2819	Iron-sulfur binding oxidoreductase; Cytoplasmic
H845_2820	1296990.H845_2820	Uncharacterized protein; [G] Carbohydrate transport and metabolism; [P] Inorganic ion transport and metabolism; [M] Cell wall/membrane/envelope biogenesis; [S] Function unknown
H845_2841	1296990.H845_2841	Phage repressor; Cytoplasmic
H845_289	1296990.H845_289	Excinuclease ABC subunit A; CytoplasmicMembrane
H845_2905	1296990.H845_2905	annotation not available
H845_2906	1296990.H845_2906	Glucose-6-phosphate 1-dehydrogenase; Catalyzes the oxidation of glucose 6-phosphate to 6- phosphogluconolactone
H845_2919	1296990.H845_2919	Glucan biosynthesis protein G; Involved in the biosynthesis of osmoregulated periplasmic glucans (OPGs)
H845_3001	1296990.H845_3001	Dihydrolipoyl dehydrogenase; Cytoplasmic
H845_3002	1296990.H845_3002	Dihydrolipoyllysine-residue succinyltransferase component of 2-oxoglutarate dehydrogenase complex; The 2-oxoglutarate dehydrogenase complex catalyzes the overall conversion of 2-oxoglutarate to succinyl-CoA and CO(2)
H845_3003	1296990.H845_3003	2-oxoglutarate dehydrogenase, E1 subunit; Cytoplasmic
H845_3013	1296990.H845_3013	Succinate dehydrogenase flavoprotein subunit; CytoplasmicMembrane; Belongs to the FAD-dependent oxidoreductase 2 family. FRD/SDH subfamily
H845_3051	1296990.H845_3051	Aconitate hydratase; Catalyzes the isomerization of citrate to isocitrate via cis-aconitate
H845_3081	1296990.H845_3081	Alpha,alpha-trehalase; [G] Carbohydrate transport and metabolism; [U] Intracellular trafficking, secretion, and vesicular transport; [V] Defense mechanisms; [M] Cell wall/membrane/envelope biogenesis; [R] general function prediction only; [P] Inorganic ion transport and metabolism
H845_3135	1296990.H845_3135	Uncharacterized protein; Cytoplasmic
H845_3137	1296990.H845_3137	Peptidase S9 prolyl oligopeptidase active site domain protein; Cytoplasmic
H845_3183	1296990.H845_3183	annotation not available
H845_3212	1296990.H845_3212	Riboflavin biosynthesis protein RibD; Cytoplasmic
H845_3253	1296990.H845_3369	Putative sulfate-binding protein; [P] Inorganic ion transport and metabolism; [L] Replication, recombination and repair; Periplasmic
H845_3420	1296990.H845_3420	GTP cyclohydrolase II; Cytoplasmic
H845_343	1296990.H845_343	annotation not available
H845_3465	1296990.H845_3465	Alpha/beta hydrolase fold protein; [R] general function prediction only; [I] Lipid transport and metabolism; [E] Amino acid transport and metabolism; [L] Replication, recombination and repair; [Q] Secondary metabolites biosynthesis, transport and catabolism; [S] Function unknown
H845_3495	1296990.H845_3495	Putative flavohemoprotein; [O] Posttranslational modification, protein turnover, chaperones; [H] Coenzyme transport and metabolism; [R] general function prediction only; [F] Nucleotide transport and metabolism; [C] Energy production and conversion; Cytoplasmic; Belongs to the globin family
H845_3604	1296990.H845_3604	annotation not available
H845_3733	1296990.H845_3733	2-dehydropantoate 2-reductase; Catalyzes the NADPH-dependent reduction of ketopantoate into pantoic acid
H845_396	1296990.H845_396	Glyoxalase/bleomycin resistance protein/dioxygenase; Cytoplasmic
H845_454	1296990.H845_454	Cellulose synthase operon protein D; Cytoplasmic
H845_455	1296990.H845_455	Beta-glucosidase; Periplasmic
H845_489	1296990.H845_489	Carbonic anhydrase; Reversible hydration of carbon dioxide
H845_550	1296990.H845_550	Uncharacterized protein; Extracellular
H845_571	1296990.H845_571	Threonine synthase; Cytoplasmic
H845_633	1296990.H845_633	Xanthine dehydrogenase, molybdopterin binding subunit; Cytoplasmic
H845_640	1296990.H845_640	Allantoate amidohydrolase; Cytoplasmic
H845_642	1296990.H845_642	Putative polysaccharide deacetylase; Cytoplasmic
H845_646	1296990.H845_646	X-Pro aminopeptidase; [G] Carbohydrate transport and metabolism; [C] Energy production and conversion; [T] Signal transduction mechanisms; [J] Translation, ribosomal structure and biogenesis; [E] Amino acid transport and metabolism; Cytoplasmic
H845_806	1296990.H845_806	annotation not available
H845_837	1296990.H845_837	Putative 2-hydroxyacid dehydrogenase; Cytoplasmic
H845_862	1296990.H845_862	Coenzyme A biosynthesis bifunctional protein CoaBC; Catalyzes two steps in the biosynthesis of coenzyme A. In the first step cysteine is conjugated to 4'-phosphopantothenate to form 4-phosphopantothenoylcysteine, in the latter compound is decarboxylated to form 4'-phosphopantotheine; In the C-terminal section; belongs to the PPC synthetase family
H845_901	1296990.H845_901	Putative ABC-type proline/glycine betaine transport protein; Cytoplasmic
H845_912	1296990.H845_912	Uncharacterized protein; [H] Coenzyme transport and metabolism; [U] Intracellular trafficking, secretion, and vesicular transport; [M] Cell wall/membrane/envelope biogenesis; [I] Lipid transport and metabolism; [L] Replication, recombination and repair; [S] Function unknown
H845_921	1296990.H845_921	Acyl-CoA synthetase; [G] Carbohydrate transport and metabolism; [C] Energy production and conversion; [Q] Secondary metabolites biosynthesis, transport and catabolism; [I] Lipid transport and metabolism; [L] Replication, recombination and repair; Cytoplasmic
apaG	1296990.H845_2627	Protein ApaG; Cytoplasmic
apt	1296990.H845_3062	Adenine phosphoribosyltransferase; Catalyzes a salvage reaction resulting in the formation of AMP, that is energically less costly than de novo synthesis
argC	1296990.H845_439	N-acetyl-gamma-glutamyl-phosphate reductase; Catalyzes the NADPH-dependent reduction of N-acetyl-5- glutamyl phosphate to yield N-acetyl-L-glutamate 5-semialdehyde; Belongs to the NAGSA dehydrogenase family. Type 2 subfamily
argG	1296990.H845_1781	Argininosuccinate synthase; [R] general function prediction only; [D] Cell cycle control, cell division, chromosome partitioning; [E] Amino acid transport and metabolism; [J] Translation, ribosomal structure and biogenesis; [S] Function unknown; Cytoplasmic; Belongs to the argininosuccinate synthase family. Type 1 subfamily
argS	1296990.H845_466	Arginine--tRNA ligase; [O] Posttranslational modification, protein turnover, chaperones; [U] Intracellular trafficking, secretion, and vesicular transport; [R] general function prediction only; [J] Translation, ribosomal structure and biogenesis; [E] Amino acid transport and metabolism; Cytoplasmic
aroB	1296990.H845_496	3-dehydroquinate synthase; Catalyzes the conversion of 3-deoxy-D-arabino- heptulosonate 7-phosphate (DAHP) to dehydroquinate (DHQ); Belongs to the sugar phosphate cyclases superfamily. Dehydroquinate synthase family
aspS	1296990.H845_461	Aspartate--tRNA(Asp/Asn) ligase; Aspartyl-tRNA synthetase with relaxed tRNA specificity since it is able to aspartylate not only its cognate tRNA(Asp) but also tRNA(Asn). Reaction proceeds in two steps: L-aspartate is first activated by ATP to form Asp-AMP and then transferred to the acceptor end of tRNA(Asp/Asn); Belongs to the class-II aminoacyl-tRNA synthetase family. Type 1 subfamily
frr	1296990.H845_522	Ribosome-recycling factor; Responsible for the release of ribosomes from messenger RNA at the termination of protein biosynthesis. May increase the efficiency of translation by recycling ribosomes from one round of translation to another
gatB	1296990.H845_1632	Aspartyl/glutamyl-tRNA(Asn/Gln) amidotransferase subunit B; Allows the formation of correctly charged Asn-tRNA(Asn) or Gln-tRNA(Gln) through the transamidation of misacylated Asp- tRNA(Asn) or Glu-tRNA(Gln) in organisms which lack either or both of asparaginyl-tRNA or glutaminyl-tRNA synthetases. The reaction takes place in the presence of glutamine and ATP through an activated phospho-Asp-tRNA(A…
glnD	1296990.H845_575	Bifunctional uridylyltransferase/uridylyl-removing enzyme; Modifies, by uridylylation and deuridylylation, the PII regulatory proteins (GlnB and homologs), in response to the nitrogen status of the cell that GlnD senses through the glutamine level. Under low glutamine levels, catalyzes the conversion of the PII proteins and UTP to PII-UMP and PPi, while under higher glutamine levels, GlnD hydroly…
gyrA	1296990.H845_381	DNA gyrase subunit A; A type II topoisomerase that negatively supercoils closed circular double-stranded (ds) DNA in an ATP-dependent manner to modulate DNA topology and maintain chromosomes in an underwound state. Negative supercoiling favors strand separation, and DNA replication, transcription, recombination and repair, all of which involve strand separation. Also able to catalyze the intercon…
gyrB	1296990.H845_869	DNA gyrase subunit B; A type II topoisomerase that negatively supercoils closed circular double-stranded (ds) DNA in an ATP-dependent manner to modulate DNA topology and maintain chromosomes in an underwound state. Negative supercoiling favors strand separation, and DNA replication, transcription, recombination and repair, all of which involve strand separation. Also able to catalyze the intercon…
hemC	1296990.H845_581	Porphobilinogen deaminase; Tetrapolymerization of the monopyrrole PBG into the hydroxymethylbilane pre-uroporphyrinogen in several discrete steps; Belongs to the HMBS family
hflX	1296990.H845_436	GTPase HflX; GTPase that associates with the 50S ribosomal subunit and may have a role during protein synthesis or ribosome biogenesis
htpG	1296990.H845_459	Chaperone protein HtpG; Molecular chaperone. Has ATPase activity
ileS	1296990.H845_2502	Multifunctional fusion protein; Catalyzes the attachment of isoleucine to tRNA(Ile). As IleRS can inadvertently accommodate and process structurally similar amino acids such as valine, to avoid such errors it has two additional distinct tRNA(Ile)-dependent editing activities. One activity is designated as 'pretransfer' editing and involves the hydrolysis of activated Val-AMP. The other activity i…
ilvD	1296990.H845_2858	Dihydroxy-acid dehydratase; Cytoplasmic; Belongs to the IlvD/Edd family
infB	1296990.H845_3043	Translation initiation factor IF-2; One of the essential components for the initiation of protein synthesis. Protects formylmethionyl-tRNA from spontaneous hydrolysis and promotes its binding to the 30S ribosomal subunits. Also involved in the hydrolysis of GTP during the formation of the 70S ribosomal complex
metXA	1296990.H845_2026	Homoserine O-acetyltransferase; Transfers an acetyl group from acetyl-CoA to L- homoserine, forming acetyl-L-homoserine
mfd	1296990.H845_1666	Transcription-repair-coupling factor; Couples transcription and DNA repair by recognizing RNA polymerase (RNAP) stalled at DNA lesions. Mediates ATP-dependent release of RNAP and its truncated transcript from the DNA, and recruitment of nucleotide excision repair machinery to the damaged site
mnmE	1296990.H845_3116	tRNA modification GTPase MnmE; Exhibits a very high intrinsic GTPase hydrolysis rate. Involved in the addition of a carboxymethylaminomethyl (cmnm) group at the wobble position (U34) of certain tRNAs, forming tRNA- cmnm(5)s(2)U34; Belongs to the TRAFAC class TrmE-Era-EngA-EngB-Septin- like GTPase superfamily. TrmE GTPase family
mtnB	1296990.H845_2506	Methylthioribulose-1-phosphate dehydratase; Catalyzes the dehydration of methylthioribulose-1- phosphate (MTRu-1-P) into 2,3-diketo-5-methylthiopentyl-1- phosphate (DK-MTP-1-P)
pnp	1296990.H845_3048	Polyribonucleotide nucleotidyltransferase; Involved in mRNA degradation. Catalyzes the phosphorolysis of single-stranded polyribonucleotides processively in the 3'- to 5'-direction
polA	1296990.H845_161	DNA polymerase I; In addition to polymerase activity, this DNA polymerase exhibits 5'-3' exonuclease activity
ppk	1296990.H845_629	Polyphosphate kinase; Catalyzes the reversible transfer of the terminal phosphate of ATP to form a long-chain polyphosphate (polyP); Belongs to the polyphosphate kinase 1 (PPK1) family
pqqC	1296990.H845_3153	Pyrroloquinoline-quinone synthase; Ring cyclization and eight-electron oxidation of 3a-(2- amino-2-carboxyethyl)-4,5-dioxo-4,5,6,7,8,9-hexahydroquinoline- 7,9-dicarboxylic-acid to PQQ
rne	1296990.H845_362	Ribonuclease E; Endoribonuclease that plays a central role in RNA processing and decay. Required for the maturation of 5S and 16S rRNAs and the majority of tRNAs. Also involved in the degradation of most mRNAs; Belongs to the RNase E/G family. RNase E subfamily
rpoA	1296990.H845_2209	DNA-directed RNA polymerase subunit alpha; DNA-dependent RNA polymerase catalyzes the transcription of DNA into RNA using the four ribonucleoside triphosphates as substrates
rpoC	1296990.H845_2238	DNA-directed RNA polymerase subunit beta'; DNA-dependent RNA polymerase catalyzes the transcription of DNA into RNA using the four ribonucleoside triphosphates as substrates
rpsO	1296990.H845_3047	30S ribosomal protein S15; Forms an intersubunit bridge (bridge B4) with the 23S rRNA of the 50S subunit in the ribosome
thiC	1296990.H845_2977	Phosphomethylpyrimidine synthase; Catalyzes the synthesis of the hydroxymethylpyrimidine phosphate (HMP-P) moiety of thiamine from aminoimidazole ribotide (AIR) in a radical S-adenosyl-L-methionine (SAM)-dependent reaction
thrS	1296990.H845_2523	Threonine--tRNA ligase; [K] Transcription; [H] Coenzyme transport and metabolism; [U] Intracellular trafficking, secretion, and vesicular transport; [R] general function prediction only; [J] Translation, ribosomal structure and biogenesis; [E] Amino acid transport and metabolism; Cytoplasmic; Belongs to the class-II aminoacyl-tRNA synthetase family
topA	1296990.H845_2489	DNA topoisomerase 1; Releases the supercoiling and torsional tension of DNA, which is introduced during the DNA replication and transcription, by transiently cleaving and rejoining one strand of the DNA duplex. Introduces a single-strand break via transesterification at a target site in duplex DNA. The scissile phosphodiester is attacked by the catalytic tyrosine of the enzyme, resulting in the f…
uvrA	1296990.H845_383	UvrABC system protein A; The UvrABC repair system catalyzes the recognition and processing of DNA lesions. UvrA is an ATPase and a DNA-binding protein. A damage recognition complex composed of 2 UvrA and 2 UvrB subunits scans DNA for abnormalities. When the presence of a lesion has been verified by UvrB, the UvrA molecules dissociate
uvrB	1296990.H845_560	UvrABC system protein B; The UvrABC repair system catalyzes the recognition and processing of DNA lesions. A damage recognition complex composed of 2 UvrA and 2 UvrB subunits scans DNA for abnormalities. Upon binding of the UvrA(2)B(2) complex to a putative damaged site, the DNA wraps around one UvrB monomer. DNA wrap is dependent on ATP binding by UvrB and probably causes local melting of the DN…
valS	1296990.H845_857	Valine--tRNA ligase; Catalyzes the attachment of valine to tRNA(Val). As ValRS can inadvertently accommodate and process structurally similar amino acids such as threonine, to avoid such errors, it has a "posttransfer" editing activity that hydrolyzes mischarged Thr-tRNA(Val) in a tRNA-dependent manner; Belongs to the class-I aminoacyl-tRNA synthetase family. ValS type 1 subfamily

## Sheet: INM_5
File S1. List of total proteins that compose each of the INM (Interaction network map), those with a PPI enrichment p-value < 0.05. The node code, the identifier, and annotated functions of network proteins based on the databases Uniprot (http://www.uniprot.org) and KEGG (https://www.genome.jp/kegg/) are included.
#Node	Identifier	Annotation
H845_1369	1296990.H845_1369	annotation not available
H845_1427	1296990.H845_1427	Aminotransferase; Cytoplasmic
H845_1433	1296990.H845_1433	Oxidoreductase; Cytoplasmic; Belongs to the short-chain dehydrogenases/reductases (SDR) family
H845_1686	1296990.H845_1686	Putative 6-phosphogluconolactonase; [G] Carbohydrate transport and metabolism; [R] general function prediction only; [M] Cell wall/membrane/envelope biogenesis; [J] Translation, ribosomal structure and biogenesis; [S] Function unknown; Periplasmic
H845_1718	1296990.H845_1718	Uncharacterized protein; CytoplasmicMembrane
H845_1821	1296990.H845_1821	tRNA/rRNA cytosine-C5-methylase Nol1/Nop2/Sun; Cytoplasmic; Belongs to the class I-like SAM-binding methyltransferase superfamily. RsmB/NOP family
H845_1858	1296990.H845_1858	Thiosulfate sulfurtransferase; [H] Coenzyme transport and metabolism; [C] Energy production and conversion; [P] Inorganic ion transport and metabolism; [R] general function prediction only; Cytoplasmic
H845_2074	1296990.H845_2074	Oligopeptidase B; Periplasmic
H845_2288	1296990.H845_2288	ATP-dependent Clp protease ATP-binding subunit ClpA; [O] Posttranslational modification, protein turnover, chaperones; [G] Carbohydrate transport and metabolism; [R] general function prediction only; [L] Replication, recombination and repair; Cytoplasmic; Belongs to the ClpA/ClpB family
H845_2311	1296990.H845_2311	Asparaginase; Cytoplasmic
H845_2584	1296990.H845_2584	Formyltetrahydrofolate deformylase; Catalyzes the hydrolysis of 10-formyltetrahydrofolate (formyl-FH4) to formate and tetrahydrofolate (FH4)
H845_262	1296990.H845_262	Aldose 1-epimerase; Cytoplasmic
H845_2662	1296990.H845_2662	annotation not available
H845_2671	1296990.H845_2671	GTP-binding protein TypA; [M] Cell wall/membrane/envelope biogenesis; [T] Signal transduction mechanisms; [J] Translation, ribosomal structure and biogenesis; [L] Replication, recombination and repair; [S] Function unknown; CytoplasmicMembrane
H845_2818	1296990.H845_2818	Iron-sulfur (Fe-S) oxidoreductase; [O] Posttranslational modification, protein turnover, chaperones; [H] Coenzyme transport and metabolism; [C] Energy production and conversion; [R] general function prediction only; [J] Translation, ribosomal structure and biogenesis; [S] Function unknown; Cytoplasmic
H845_2876	1296990.H845_2876	Metallophosphoesterase; Cytoplasmic
H845_2895	1296990.H845_2895	NADH:flavin oxidoreductase/NADH oxidase; Cytoplasmic
H845_2907	1296990.H845_2907	6-phosphogluconate dehydrogenase-like protein; Cytoplasmic
H845_302	1296990.H845_302	Uroporphyrin-III C-methyltransferase; Multifunctional enzyme that catalyzes the SAM-dependent methylations of uroporphyrinogen III at position C-2 and C-7 to form precorrin-2 via precorrin-1. Then it catalyzes the NAD- dependent ring dehydrogenation of precorrin-2 to yield sirohydrochlorin. Finally, it catalyzes the ferrochelation of sirohydrochlorin to yield siroheme
H845_3055	1296990.H845_3055	Ornithine decarboxylase; [G] Carbohydrate transport and metabolism; [F] Nucleotide transport and metabolism; [P] Inorganic ion transport and metabolism; [E] Amino acid transport and metabolism; Cytoplasmic; Belongs to the Orn/Lys/Arg decarboxylase class-II family
H845_3156	1296990.H845_3156	Transcriptional regulator, Crp/Fnr family; [H] Coenzyme transport and metabolism; [F] Nucleotide transport and metabolism; [Q] Secondary metabolites biosynthesis, transport and catabolism; [T] Signal transduction mechanisms; [I] Lipid transport and metabolism; [S] Function unknown; Cytoplasmic
H845_3413	1296990.H845_3413	Flavin-containing monooxygenase; [O] Posttranslational modification, protein turnover, chaperones; [P] Inorganic ion transport and metabolism; [R] general function prediction only; [F] Nucleotide transport and metabolism; [C] Energy production and conversion; [L] Replication, recombination and repair; [Q] Secondary metabolites biosynthesis, transport and catabolism; Cytoplasmic
H845_3553	1296990.H845_3553	Uncharacterized protein; Cytoplasmic
H845_387	1296990.H845_387	Glycine cleavage system T protein; [V] Defense mechanisms; [R] general function prediction only; [E] Amino acid transport and metabolism; [D] Cell cycle control, cell division, chromosome partitioning; [J] Translation, ribosomal structure and biogenesis; Cytoplasmic
H845_449	1296990.H845_449	Endo-1,4-beta-glucanase; Extracellular
H845_473	1296990.H845_473	Helicase domain protein; Cytoplasmic
H845_474	1296990.H845_474	Oxidoreductase FAD-binding domain protein; [H] Coenzyme transport and metabolism; [G] Carbohydrate transport and metabolism; [C] Energy production and conversion; [M] Cell wall/membrane/envelope biogenesis; [I] Lipid transport and metabolism; [E] Amino acid transport and metabolism; Cytoplasmic
H845_557	1296990.H845_557	Glutamate synthase [NADPH] large chain; [N] Cell motility; [F] Nucleotide transport and metabolism; [C] Energy production and conversion; [R] general function prediction only; [M] Cell wall/membrane/envelope biogenesis; [E] Amino acid transport and metabolism; Cytoplasmic
H845_576	1296990.H845_576	DNA mismatch repair protein MutS; This protein is involved in the repair of mismatches in DNA
H845_632	1296990.H845_632	Putative xanthine dehydrogenase, xdhA; Cytoplasmic
H845_635	1296990.H845_635	Transcriptional regulator, LysR family protein; Cytoplasmic
H845_876	1296990.H845_876	Thiamine-phosphate pyrophosphorylase; Cytoplasmic
carB	1296990.H845_2174	annotation not available
cysC	1296990.H845_1736	Adenylyl-sulfate kinase; Catalyzes the synthesis of activated sulfate
fusA	1296990.H845_2069	Elongation factor G; Catalyzes the GTP-dependent ribosomal translocation step during translation elongation. During this step, the ribosome changes from the pre-translocational (PRE) to the post- translocational (POST) state as the newly formed A-site-bound peptidyl-tRNA and P-site-bound deacylated tRNA move to the P and E sites, respectively. Catalyzes the coordinated movement of the two tRNA mo…
glyQ	1296990.H845_373	Glycine--tRNA ligase alpha subunit; Cytoplasmic
guaB	1296990.H845_1822	Inosine-5'-monophosphate dehydrogenase; Catalyzes the conversion of inosine 5'-phosphate (IMP) to xanthosine 5'-phosphate (XMP), the first committed and rate- limiting step in the de novo synthesis of guanine nucleotides, and therefore plays an important role in the regulation of cell growth; Belongs to the IMPDH/GMPR family
leuB	1296990.H845_2090	3-isopropylmalate dehydrogenase; Catalyzes the oxidation of 3-carboxy-2-hydroxy-4- methylpentanoate (3-isopropylmalate) to 3-carboxy-4-methyl-2- oxopentanoate. The product decarboxylates to 4-methyl-2 oxopentanoate
leuC	1296990.H845_2092	3-isopropylmalate dehydratase large subunit; Catalyzes the isomerization between 2-isopropylmalate and 3-isopropylmalate, via the formation of 2-isopropylmaleate; Belongs to the aconitase/IPM isomerase family. LeuC type 1 subfamily
ligA	1296990.H845_1989	DNA ligase; DNA ligase that catalyzes the formation of phosphodiester linkages between 5'-phosphoryl and 3'-hydroxyl groups in double-stranded DNA using NAD as a coenzyme and as the energy source for the reaction. It is essential for DNA replication and repair of damaged DNA
lpxC	1296990.H845_1986	UDP-3-O-acyl-N-acetylglucosamine deacetylase; Catalyzes the hydrolysis of UDP-3-O-myristoyl-N- acetylglucosamine to form UDP-3-O-myristoylglucosamine and acetate, the committed step in lipid A biosynthesis; Belongs to the LpxC family
miaB	1296990.H845_1794	tRNA-2-methylthio-N(6)-dimethylallyladenosine synthase; Catalyzes the methylthiolation of N6- (dimethylallyl)adenosine (i(6)A), leading to the formation of 2- methylthio-N6-(dimethylallyl)adenosine (ms(2)i(6)A) at position 37 in tRNAs that read codons beginning with uridine
pheT	1296990.H845_1763	Phenylalanine--tRNA ligase beta subunit; Cytoplasmic; Belongs to the phenylalanyl-tRNA synthetase beta subunit family. Type 1 subfamily
purH	1296990.H845_3182	Bifunctional purine biosynthesis protein PurH; Cytoplasmic
purL	1296990.H845_1884	Phosphoribosylformylglycinamidine synthase subunit PurL; Part of the phosphoribosylformylglycinamidine synthase complex involved in the purines biosynthetic pathway. Catalyzes the ATP-dependent conversion of formylglycinamide ribonucleotide (FGAR) and glutamine to yield formylglycinamidine ribonucleotide (FGAM) and glutamate. The FGAM synthase complex is composed of three subunits. PurQ produces …
ribA	1296990.H845_3210	Multifunctional fusion protein; Catalyzes the conversion of D-ribulose 5-phosphate to formate and 3,4-dihydroxy-2-butanone 4-phosphate; Belongs to the DHBP synthase family
rpoB	1296990.H845_2239	DNA-directed RNA polymerase subunit beta; DNA-dependent RNA polymerase catalyzes the transcription of DNA into RNA using the four ribonucleoside triphosphates as substrates
speE	1296990.H845_385	Polyamine aminopropyltransferase; Catalyzes the irreversible transfer of a propylamine group from the amino donor S-adenosylmethioninamine (decarboxy- AdoMet) to putrescine (1,4-diaminobutane) to yield spermidine; Belongs to the spermidine/spermine synthase family
topA	1296990.H845_2489	DNA topoisomerase 1; Releases the supercoiling and torsional tension of DNA, which is introduced during the DNA replication and transcription, by transiently cleaving and rejoining one strand of the DNA duplex. Introduces a single-strand break via transesterification at a target site in duplex DNA. The scissile phosphodiester is attacked by the catalytic tyrosine of the enzyme, resulting in the f…
trmD	1296990.H845_2094	tRNA (guanine-N(1)-)-methyltransferase; Specifically methylates guanosine-37 in various tRNAs; Belongs to the RNA methyltransferase TrmD family
trpC	1296990.H845_1903	Indole-3-glycerol phosphate synthase; Cytoplasmic; Belongs to the TrpC family
tyrS	1296990.H845_337	Tyrosine--tRNA ligase; Catalyzes the attachment of tyrosine to tRNA(Tyr) in a two-step reaction: tyrosine is first activated by ATP to form Tyr- AMP and then transferred to the acceptor end of tRNA(Tyr); Belongs to the class-I aminoacyl-tRNA synthetase family. TyrS type 1 subfamily

## Sheet: INM_6
File S1. List of total proteins that compose each of the INM (Interaction network map), those with a PPI enrichment p-value < 0.05. The node code, the identifier, and annotated functions of network proteins based on the databases Uniprot (http://www.uniprot.org) and KEGG (https://www.genome.jp/kegg/) are included.
#Node	Identifier	Annotation
H845_1234	1296990.H845_1234	D-amino acid dehydrogenase; Oxidative deamination of D-amino acids
H845_1282	1296990.H845_1282	annotation not available
H845_1295	1296990.H845_1295	Putative mucR family transcriptional regulatory protein; Cytoplasmic
H845_1423	1296990.H845_1423	TonB-dependent ferrichrome siderophore receptor; [H] Coenzyme transport and metabolism; [K] Transcription; [P] Inorganic ion transport and metabolism; [S] Function unknown; OuterMembrane
H845_1578	1296990.H845_1578	Site-specific recombinase, resolvase family; Cytoplasmic
H845_162	1296990.H845_162	Electron transport protein SCO1/SenC; [M] Cell wall/membrane/envelope biogenesis; [R] general function prediction only; [G] Carbohydrate transport and metabolism
H845_1689	1296990.H845_1689	Putative 2-nitropropane dioxygenase; Cytoplasmic
H845_1739	1296990.H845_1739	Uncharacterized protein; [H] Coenzyme transport and metabolism; [C] Energy production and conversion; [R] general function prediction only; [J] Translation, ribosomal structure and biogenesis; [L] Replication, recombination and repair; [S] Function unknown
H845_1789	1296990.H845_1789	annotation not available
H845_18	1296990.H845_18	RND efflux system, outer membrane lipoprotein, NodT family; OuterMembrane
H845_1818	1296990.H845_1818	Putative DNA-binding response regulator mtrA; Cytoplasmic
H845_19	1296990.H845_19	Secretion protein HlyD family protein; [V] Defense mechanisms; [M] Cell wall/membrane/envelope biogenesis; [R] general function prediction only; [I] Lipid transport and metabolism; [E] Amino acid transport and metabolism; CytoplasmicMembrane
H845_1908	1296990.H845_1908	Peptidyl-prolyl cis-trans isomerase D; CytoplasmicMembrane
H845_1946	1296990.H845_1946	Transcriptional regulator, AsnC family protein; Cytoplasmic
H845_1947	1296990.H845_1947	Thioredoxin reductase; Cytoplasmic; Belongs to the class-II pyridine nucleotide-disulfide oxidoreductase family
H845_1948	1296990.H845_1948	Transcriptional regulator, LysR family; Cytoplasmic
H845_1951	1296990.H845_1951	annotation not available
H845_2041	1296990.H845_2041	NADH-quinone oxidoreductase, E subunit; [C] Energy production and conversion; [M] Cell wall/membrane/envelope biogenesis; [J] Translation, ribosomal structure and biogenesis; Cytoplasmic
H845_2128	1296990.H845_2128	ATP-dependent protease subunit HslV; Protease subunit of a proteasome-like degradation complex believed to be a general protein degrading machinery; Belongs to the peptidase T1B family. HslV subfamily
H845_2156	1296990.H845_2156	3'(2'),5'-bisphosphate nucleotidase; Cytoplasmic
H845_22	1296990.H845_22	Uncharacterized protein; CytoplasmicMembrane
H845_2245	1296990.H845_2245	Multidrug efflux pump acriflavin resistance protein AcrB/AcrD/AcrF; CytoplasmicMembrane; Belongs to the membrane fusion protein (MFP) (TC 8.A.1) family
H845_2262	1296990.H845_2262	annotation not available
H845_2493	1296990.H845_2493	OmpA/MotB domain protein; OuterMembrane
H845_2496	1296990.H845_2496	annotation not available
H845_2546	1296990.H845_2546	ATP-dependent Clp protease proteolytic subunit; Cleaves peptides in various proteins in a process that requires ATP hydrolysis. Has a chymotrypsin-like activity. Plays a major role in the degradation of misfolded proteins; Belongs to the peptidase S14 family
H845_2614	1296990.H845_2614	annotation not available
H845_2637	1296990.H845_2637	Quinone-dependent D-lactate dehydrogenase; Catalyzes the oxidation of D-lactate to pyruvate; Belongs to the quinone-dependent D-lactate dehydrogenase family
H845_2642	1296990.H845_2642	Heat shock protein DnaJ domain protein; Cytoplasmic
H845_2673	1296990.H845_2673	annotation not available
H845_2775	1296990.H845_2775	Multidrug efflux pump acriflavin resistance protein AcrB/AcrD/AcrF; CytoplasmicMembrane; Belongs to the membrane fusion protein (MFP) (TC 8.A.1) family
H845_2810	1296990.H845_2810	annotation not available
H845_2828	1296990.H845_2828	Trehalose 6-phosphate phosphatase; Removes the phosphate from trehalose 6-phosphate to produce free trehalose
H845_2902	1296990.H845_2902	Ribose-5-phosphate isomerase A; Catalyzes the reversible conversion of ribose-5- phosphate to ribulose 5-phosphate
H845_2934	1296990.H845_2934	Putative kinase inhibitor protein; Cytoplasmic
H845_3027	1296990.H845_3027	Two component transcriptional regulator, winged helix family protein; [C] Energy production and conversion; [T] Signal transduction mechanisms; [E] Amino acid transport and metabolism; [S] Function unknown; Cytoplasmic
H845_3036	1296990.H845_3036	dITP/XTP pyrophosphatase; Pyrophosphatase that catalyzes the hydrolysis of nucleoside triphosphates to their monophosphate derivatives, with a high preference for the non-canonical purine nucleotides XTP (xanthosine triphosphate), dITP (deoxyinosine triphosphate) and ITP. Seems to function as a house-cleaning enzyme that removes non-canonical purine nucleotides from the nucleotide pool, thus prev…
H845_3045	1296990.H845_3045	annotation not available
H845_3080	1296990.H845_3080	Peptidase U62 modulator of DNA gyrase; [O] Posttranslational modification, protein turnover, chaperones; [H] Coenzyme transport and metabolism; [R] general function prediction only; [M] Cell wall/membrane/envelope biogenesis; [D] Cell cycle control, cell division, chromosome partitioning; Cytoplasmic
H845_3099	1296990.H845_3099	Bifunctional protein FolD; Catalyzes the oxidation of 5,10- methylenetetrahydrofolate to 5,10-methenyltetrahydrofolate and then the hydrolysis of 5,10-methenyltetrahydrofolate to 10- formyltetrahydrofolate
H845_3100	1296990.H845_3100	Periplasmic serine endoprotease DegP-like; Periplasmic; Belongs to the peptidase S1C family
H845_3118	1296990.H845_3118	Alcohol dehydrogenase; Cytoplasmic
H845_3142	1296990.H845_3142	annotation not available
H845_3162	1296990.H845_3162	Electron transfer flavoprotein subunit beta; [H] Coenzyme transport and metabolism; [C] Energy production and conversion; [P] Inorganic ion transport and metabolism; [M] Cell wall/membrane/envelope biogenesis; [R] general function prediction only; [S] Function unknown; Cytoplasmic
H845_3220	1296990.H845_3220	annotation not available
H845_3224	1296990.H845_3224	annotation not available
H845_3293	1296990.H845_3293	Cell filamentation cAMP-inducing protein Fic; [P] Inorganic ion transport and metabolism; [D] Cell cycle control, cell division, chromosome partitioning; [C] Energy production and conversion; [S] Function unknown; Cytoplasmic
H845_3353	1296990.H845_3353	annotation not available
H845_3416	1296990.H845_3416	Selenophosphate synthetase; CytoplasmicMembrane
H845_3457	1296990.H845_3457	Uncharacterized protein; Cytoplasmic
H845_3561	1296990.H845_3561	Sporulation initiation inhibitor protein; [P] Inorganic ion transport and metabolism; [R] general function prediction only; [G] Carbohydrate transport and metabolism; [D] Cell cycle control, cell division, chromosome partitioning; Cytoplasmic
H845_408	1296990.H845_408	Gamma-glutamyltranspeptidase; [G] Carbohydrate transport and metabolism; [E] Amino acid transport and metabolism; [S] Function unknown; Periplasmic
H845_416	1296990.H845_416	Site-determining protein; [K] Transcription; [U] Intracellular trafficking, secretion, and vesicular transport; [F] Nucleotide transport and metabolism; [C] Energy production and conversion; [D] Cell cycle control, cell division, chromosome partitioning; Cytoplasmic; Belongs to the ParA family
H845_419	1296990.H845_419	Putative glutathione reductase; [F] Nucleotide transport and metabolism; [C] Energy production and conversion; [R] general function prediction only; [P] Inorganic ion transport and metabolism; [J] Translation, ribosomal structure and biogenesis; [L] Replication, recombination and repair
H845_423	1296990.H845_423	annotation not available
H845_465	1296990.H845_465	Deoxyguanosinetriphosphate triphosphohydrolase-like protein; Cytoplasmic; Belongs to the dGTPase family. Type 2 subfamily
H845_493	1296990.H845_493	Outer membrane protein; [N] Cell motility; [M] Cell wall/membrane/envelope biogenesis; [R] general function prediction only; [J] Translation, ribosomal structure and biogenesis; [S] Function unknown; OuterMembrane
H845_505	1296990.H845_505	Uncharacterized protein; Cytoplasmic
H845_533	1296990.H845_533	Lactoylglutathione lyase; Catalyzes the conversion of hemimercaptal, formed from methylglyoxal and glutathione, to S-lactoylglutathione
H845_584	1296990.H845_584	annotation not available
H845_608	1296990.H845_608	Cytochrome o ubiquinol oxidase subunit I; [O] Posttranslational modification, protein turnover, chaperones; [K] Transcription; [C] Energy production and conversion; [M] Cell wall/membrane/envelope biogenesis; [E] Amino acid transport and metabolism; [S] Function unknown; CytoplasmicMembrane
H845_651	1296990.H845_651	Haloacid dehalogenase domain protein hydrolase; [G] Carbohydrate transport and metabolism; [V] Defense mechanisms; [P] Inorganic ion transport and metabolism; [R] general function prediction only; [E] Amino acid transport and metabolism; Cytoplasmic
H845_667	1296990.H845_667	Two-component response regulator; Cytoplasmic
H845_832	1296990.H845_832	Short-chain dehydrogenase/reductase SDR; [V] Defense mechanisms; [M] Cell wall/membrane/envelope biogenesis; [P] Inorganic ion transport and metabolism; [R] general function prediction only; [I] Lipid transport and metabolism; [D] Cell cycle control, cell division, chromosome partitioning; [E] Amino acid transport and metabolism; Cytoplasmic
H845_859	1296990.H845_859	ABC transporter related protein; CytoplasmicMembrane
ahpD	1296990.H845_2893	Alkyl hydroperoxide reductase AhpD; Antioxidant protein with alkyl hydroperoxidase activity. Required for the reduction of the AhpC active site cysteine residues and for the regeneration of the AhpC enzyme activity
atpG	1296990.H845_2679	ATP synthase gamma chain; Produces ATP from ADP in the presence of a proton gradient across the membrane. The gamma chain is believed to be important in regulating ATPase activity and the flow of protons through the CF(0) complex
dnaQ	1296990.H845_886	DNA polymerase III subunit epsilon; DNA polymerase III is a complex, multichain enzyme responsible for most of the replicative synthesis in bacteria. The epsilon subunit contain the editing function and is a proofreading 3'-5' exonuclease
fabZ	1296990.H845_530	3-hydroxyacyl-[acyl-carrier-protein] dehydratase FabZ; Involved in unsaturated fatty acids biosynthesis. Catalyzes the dehydration of short chain beta-hydroxyacyl-ACPs and long chain saturated and unsaturated beta-hydroxyacyl-ACPs
ffh	1296990.H845_2097	Signal recognition particle protein; Involved in targeting and insertion of nascent membrane proteins into the cytoplasmic membrane. Binds to the hydrophobic signal sequence of the ribosome-nascent chain (RNC) as it emerges from the ribosomes. The SRP-RNC complex is then targeted to the cytoplasmic membrane where it interacts with the SRP receptor FtsY. Interaction with FtsY leads to the transfer…
ftsJ	1296990.H845_1773	Ribosomal RNA large subunit methyltransferase E; Specifically methylates the uridine in position 2552 of 23S rRNA at the 2'-O position of the ribose in the fully assembled 50S ribosomal subunit
ftsY	1296990.H845_399	Signal recognition particle receptor FtsY; Involved in targeting and insertion of nascent membrane proteins into the cytoplasmic membrane. Acts as a receptor for the complex formed by the signal recognition particle (SRP) and the ribosome-nascent chain (RNC). Interaction with SRP-RNC leads to the transfer of the RNC complex to the Sec translocase for insertion into the membrane, the hydrolysis of…
gcvH	1296990.H845_388	Glycine cleavage system H protein; The glycine cleavage system catalyzes the degradation of glycine. The H protein shuttles the methylamine group of glycine from the P protein to the T protein
gloB	1296990.H845_2143	Hydroxyacylglutathione hydrolase; Thiolesterase that catalyzes the hydrolysis of S-D- lactoyl-glutathione to form glutathione and D-lactic acid
infC	1296990.H845_2522	Translation initiation factor IF-3; IF-3 binds to the 30S ribosomal subunit and shifts the equilibrum between 70S ribosomes and their 50S and 30S subunits in favor of the free subunits, thus enhancing the availability of 30S subunits on which protein synthesis initiation begins
minC	1296990.H845_417	Probable septum site-determining protein MinC; Cell division inhibitor that blocks the formation of polar Z ring septums. Rapidly oscillates between the poles of the cell to destabilize FtsZ filaments that have formed before they mature into polar Z rings. Prevents FtsZ polymerization
mtnD	1296990.H845_2505	Acireductone dioxygenase; Catalyzes 2 different reactions between oxygene and the acireductone 1,2-dihydroxy-3-keto-5-methylthiopentene (DHK-MTPene) depending upon the metal bound in the active site. Fe-containing acireductone dioxygenase (Fe-ARD) produces formate and 2-keto-4- methylthiobutyrate (KMTB), the alpha-ketoacid precursor of methionine in the methionine recycle pathway. Ni-containing a…
nadK	1296990.H845_34	NAD kinase; Involved in the regulation of the intracellular balance of NAD and NADP, and is a key enzyme in the biosynthesis of NADP. Catalyzes specifically the phosphorylation on 2'-hydroxyl of the adenosine moiety of NAD to yield NADP
nusB	1296990.H845_677	Transcription antitermination protein NusB; Involved in transcription antitermination. Required for transcription of ribosomal RNA (rRNA) genes. Binds specifically to the boxA antiterminator sequence of the ribosomal RNA (rrn) operons
pqqB	1296990.H845_3154	Coenzyme PQQ synthesis protein B; May be involved in the transport of PQQ or its precursor to the periplasm
rbfA	1296990.H845_3044	Ribosome-binding factor A; One of several proteins that assist in the late maturation steps of the functional core of the 30S ribosomal subunit. Associates with free 30S ribosomal subunits (but not with 30S subunits that are part of 70S ribosomes or polysomes). Required for efficient processing of 16S rRNA. May interact with the 5'-terminal helix region of 16S rRNA
rplA	1296990.H845_2242	50S ribosomal protein L1; Binds directly to 23S rRNA. The L1 stalk is quite mobile in the ribosome, and is involved in E site tRNA release
rplC	1296990.H845_2233	50S ribosomal protein L3; One of the primary rRNA binding proteins, it binds directly near the 3'-end of the 23S rRNA, where it nucleates assembly of the 50S subunit
rplD	1296990.H845_2232	50S ribosomal protein L4; Forms part of the polypeptide exit tunnel
rplK	1296990.H845_2243	50S ribosomal protein L11; Forms part of the ribosomal stalk which helps the ribosome interact with GTP-bound translation factors
rplN	1296990.H845_2223	50S ribosomal protein L14; Binds to 23S rRNA. Forms part of two intersubunit bridges in the 70S ribosome
rplO	1296990.H845_2214	50S ribosomal protein L15; Binds to the 23S rRNA
rplQ	1296990.H845_2208	50S ribosomal protein L17; Cytoplasmic
rplS	1296990.H845_2093	50S ribosomal protein L19; This protein is located at the 30S-50S ribosomal subunit interface and may play a role in the structure and function of the aminoacyl-tRNA binding site
rplU	1296990.H845_1959	50S ribosomal protein L21; This protein binds to 23S rRNA in the presence of protein L20
rpoH	1296990.H845_444	RNA polymerase sigma factor RpoH; [K] Transcription; [H] Coenzyme transport and metabolism; [U] Intracellular trafficking, secretion, and vesicular transport; [C] Energy production and conversion; [S] Function unknown; Cytoplasmic
rpsC	1296990.H845_2227	30S ribosomal protein S3; Binds the lower part of the 30S subunit head. Binds mRNA in the 70S ribosome, positioning it for translation
rpsD	1296990.H845_484	30S ribosomal protein S4; One of the primary rRNA binding proteins, it binds directly to 16S rRNA where it nucleates assembly of the body of the 30S subunit
rpsE	1296990.H845_2216	30S ribosomal protein S5; Located at the back of the 30S subunit body where it stabilizes the conformation of the head with respect to the body; Belongs to the universal ribosomal protein uS5 family
rpsG	1296990.H845_2236	30S ribosomal protein S7; One of the primary rRNA binding proteins, it binds directly to 16S rRNA where it nucleates assembly of the head domain of the 30S subunit. Is located at the subunit interface close to the decoding center, probably blocks exit of the E-site tRNA
rpsH	1296990.H845_2219	30S ribosomal protein S8; One of the primary rRNA binding proteins, it binds directly to 16S rRNA central domain where it helps coordinate assembly of the platform of the 30S subunit
rpsK	1296990.H845_2210	30S ribosomal protein S11; Located on the platform of the 30S subunit, it bridges several disparate RNA helices of the 16S rRNA. Forms part of the Shine-Dalgarno cleft in the 70S ribosome
rpsL	1296990.H845_2237	30S ribosomal protein S12; Interacts with and stabilizes bases of the 16S rRNA that are involved in tRNA selection in the A site and with the mRNA backbone. Located at the interface of the 30S and 50S subunits, it traverses the body of the 30S subunit contacting proteins on the other side and probably holding the rRNA structure together. The combined cluster of proteins S8, S12 and S17 appears to…
rpsQ	1296990.H845_2224	30S ribosomal protein S17; One of the primary rRNA binding proteins, it binds specifically to the 5'-end of 16S ribosomal RNA
thiG	1296990.H845_875	Thiazole synthase; Catalyzes the rearrangement of 1-deoxy-D-xylulose 5- phosphate (DXP) to produce the thiazole phosphate moiety of thiamine. Sulfur is provided by the thiocarboxylate moiety of the carrier protein ThiS. In vitro, sulfur can be provided by H(2)S
upp	1296990.H845_2177	Uracil phosphoribosyltransferase; Catalyzes the conversion of uracil and 5-phospho-alpha- D-ribose 1-diphosphate (PRPP) to UMP and diphosphate
yidC	1296990.H845_537	Membrane protein insertase YidC; Required for the insertion and/or proper folding and/or complex formation of integral membrane proteins into the membrane. Involved in integration of membrane proteins that insert both dependently and independently of the Sec translocase complex, as well as at least some lipoproteins. Aids folding of multispanning membrane proteins

## Sheet: INM_7
File S1. List of total proteins that compose each of the INM (Interaction network map), those with a PPI enrichment p-value < 0.05. The node code, the identifier, and annotated functions of network proteins based on the databases Uniprot (http://www.uniprot.org) and KEGG (https://www.genome.jp/kegg/) are included.
#Node	Identifier	Annotation
H845_1095	1296990.H845_1095	Transcriptional regulator PadR; Cytoplasmic
H845_1132	1296990.H845_1132	Short-chain dehydrogenase/reductase SDR; Cytoplasmic
H845_1311	1296990.H845_1311	annotation not available
H845_1312	1296990.H845_1312	annotation not available
H845_1367	1296990.H845_1367	Pirin domain protein; Cytoplasmic; Belongs to the pirin family
H845_1374	1296990.H845_1374	Linocin-M18; Cytoplasmic
H845_1375	1296990.H845_1375	Iron-dependent peroxidase; Cytoplasmic
H845_1447	1296990.H845_1447	Cys-tRNA(Pro)/Cys-tRNA(Cys) deacylase; Cytoplasmic; Belongs to the prolyl-tRNA editing family. YbaK/EbsC subfamily
H845_1568	1296990.H845_1568	Heat shock protein Hsp20/alpha/HspA; [O] Posttranslational modification, protein turnover, chaperones; [K] Transcription; [R] general function prediction only; [T] Signal transduction mechanisms; Belongs to the small heat shock protein (HSP20) family
H845_1569	1296990.H845_1569	Glutathione S-transferase; Cytoplasmic
H845_1643	1296990.H845_1643	Ferric uptake regulation protein; Cytoplasmic; Belongs to the Fur family
H845_1662	1296990.H845_1662	Cold shock-like protein cspE; Cytoplasmic
H845_1688	1296990.H845_1688	Aspartokinase; [H] Coenzyme transport and metabolism; [O] Posttranslational modification, protein turnover, chaperones; [U] Intracellular trafficking, secretion, and vesicular transport; [M] Cell wall/membrane/envelope biogenesis; [E] Amino acid transport and metabolism; Cytoplasmic; Belongs to the aspartokinase family
H845_1708	1296990.H845_1708	Aldehyde dehydrogenase; [H] Coenzyme transport and metabolism; [C] Energy production and conversion; [R] general function prediction only; [P] Inorganic ion transport and metabolism; [J] Translation, ribosomal structure and biogenesis; CytoplasmicMembrane
H845_1709	1296990.H845_1709	Aldehyde dehydrogenase small subunit; Cytoplasmic
H845_1723	1296990.H845_1723	Delta-aminolevulinic acid dehydratase; Cytoplasmic; Belongs to the ALAD family
H845_1729	1296990.H845_1729	Osmotically inducible protein C; Cytoplasmic
H845_173	1296990.H845_173	Antibiotic Biosynthesis Monooxygenase; [R] general function prediction only; [I] Lipid transport and metabolism; [C] Energy production and conversion; [S] Function unknown
H845_174	1296990.H845_174	Oxidoreductase; Cytoplasmic
H845_1755	1296990.H845_1755	annotation not available
H845_1782	1296990.H845_1782	Peptidyl-prolyl cis-trans isomerase; [O] Posttranslational modification, protein turnover, chaperones; [P] Inorganic ion transport and metabolism; [E] Amino acid transport and metabolism; [L] Replication, recombination and repair; OuterMembrane
H845_1797	1296990.H845_1797	CBS domain containing protein; [H] Coenzyme transport and metabolism; [O] Posttranslational modification, protein turnover, chaperones; [P] Inorganic ion transport and metabolism; [R] general function prediction only; [M] Cell wall/membrane/envelope biogenesis; [L] Replication, recombination and repair; CytoplasmicMembrane
H845_1812	1296990.H845_1812	Molybdopterin biosynthesis MoaE protein; Cytoplasmic
H845_1859	1296990.H845_1859	annotation not available
H845_187	1296990.H845_187	Uncharacterized protein; [P] Inorganic ion transport and metabolism; [G] Carbohydrate transport and metabolism; [S] Function unknown
H845_1894	1296990.H845_1894	annotation not available
H845_1943	1296990.H845_1943	annotation not available
H845_2048	1296990.H845_2048	Histone family protein DNA-binding protein; Cytoplasmic; Belongs to the bacterial histone-like protein family
H845_2077	1296990.H845_2077	MerR family transcriptional regulator; Cytoplasmic
H845_2244	1296990.H845_2244	Secretion system type I outer membrane efflux pump lipoprotein NodT; OuterMembrane
H845_2263	1296990.H845_2263	annotation not available
H845_2284	1296990.H845_2284	Gamma-glutamyltransferase; Periplasmic
H845_23	1296990.H845_23	annotation not available
H845_2324	1296990.H845_2324	D-isomer specific 2-hydroxyacid dehydrogenase NAD-binding protein; Cytoplasmic; Belongs to the D-isomer specific 2-hydroxyacid dehydrogenase family
H845_2514	1296990.H845_2514	annotation not available
H845_2517	1296990.H845_2517	Putative protease protein; [O] Posttranslational modification, protein turnover, chaperones; [M] Cell wall/membrane/envelope biogenesis; [T] Signal transduction mechanisms; [E] Amino acid transport and metabolism; [S] Function unknown; Periplasmic
H845_2518	1296990.H845_2518	Two component transcriptional regulator, winged helix family protein; Cytoplasmic
H845_2592	1296990.H845_2592	Uncharacterized protein; Periplasmic
H845_2603	1296990.H845_2603	Peptidoglycan-associated lipoprotein; OuterMembrane; Belongs to the ompA family
H845_2612	1296990.H845_2612	Probable transcriptional regulatory protein H845_2612; Cytoplasmic
H845_2623	1296990.H845_2623	annotation not available
H845_2645	1296990.H845_2645	annotation not available
H845_2648	1296990.H845_2648	Histidine kinase; Cytoplasmic
H845_2663	1296990.H845_2663	Thioredoxin; [O] Posttranslational modification, protein turnover, chaperones; [C] Energy production and conversion; [M] Cell wall/membrane/envelope biogenesis; [E] Amino acid transport and metabolism; [S] Function unknown; Cytoplasmic; Belongs to the thioredoxin family
H845_2666	1296990.H845_2666	Putative nucleotidyl transferase; Cytoplasmic
H845_2694	1296990.H845_2694	annotation not available
H845_2787	1296990.H845_2787	Beta-lactamase domain protein; Cytoplasmic
H845_2788	1296990.H845_2788	AtsE protein; Cytoplasmic
H845_2791	1296990.H845_2791	Endoribonuclease L-PSP; Cytoplasmic
H845_2827	1296990.H845_2827	Alpha,alpha-trehalose-phosphate synthase (UDP-forming); Cytoplasmic
H845_2834	1296990.H845_2834	Endoribonuclease L-PSP; [R] general function prediction only; [J] Translation, ribosomal structure and biogenesis; [E] Amino acid transport and metabolism; [S] Function unknown
H845_286	1296990.H845_286	annotation not available
H845_2882	1296990.H845_2882	Lysyl-tRNA synthetase; Cytoplasmic
H845_2912	1296990.H845_2912	Ankyrin-like protein; [H] Coenzyme transport and metabolism; [C] Energy production and conversion; [R] general function prediction only; [S] Function unknown
H845_2924	1296990.H845_2924	Periplasmic serine endoprotease DegP-like; Periplasmic; Belongs to the peptidase S1C family
H845_2935	1296990.H845_2935	Glyoxalase/bleomycin resistance protein/dioxygenase; Cytoplasmic
H845_2937	1296990.H845_2937	annotation not available
H845_2971	1296990.H845_2971	ExbB/TolQ/MotA; CytoplasmicMembrane
H845_3025	1296990.H845_3025	Scaffold protein Nfu/NifU; [O] Posttranslational modification, protein turnover, chaperones; [H] Coenzyme transport and metabolism; [C] Energy production and conversion; Cytoplasmic
H845_3028	1296990.H845_3028	annotation not available
H845_3059	1296990.H845_3059	Biotin carboxyl carrier protein of acetyl-CoA carboxylase; This protein is a component of the acetyl coenzyme A carboxylase complex; first, biotin carboxylase catalyzes the carboxylation of the carrier protein and then the transcarboxylase transfers the carboxyl group to form malonyl-CoA
H845_306	1296990.H845_306	Thioredoxin protein; Cytoplasmic
H845_3094	1296990.H845_3094	annotation not available
H845_315	1296990.H845_315	Uncharacterized protein; Extracellular
H845_3158	1296990.H845_3158	OuterMembrane
H845_318	1296990.H845_318	annotation not available
H845_3268	1296990.H845_3334	Transcriptional regulator, Fis family; Cytoplasmic
H845_3318	1296990.H845_3318	annotation not available
H845_3562	1296990.H845_3562	Chromosome partitioning protein ParB; Cytoplasmic; Belongs to the ParB family
H845_376	1296990.H845_376	2-dehydro-3-deoxyphosphogluconate aldolase/4-hydroxy-2-oxoglutarate aldolase; Cytoplasmic
H845_379	1296990.H845_379	Peptidyl-prolyl cis-trans isomerase; PPIases accelerate the folding of proteins. It catalyzes the cis-trans isomerization of proline imidic peptide bonds in oligopeptides
H845_382	1296990.H845_382	Single-stranded DNA-binding protein; Plays an important role in DNA replication, recombination and repair. Binds to ssDNA and to an array of partner proteins to recruit them to their sites of action during DNA metabolism
H845_386	1296990.H845_386	annotation not available
H845_40	1296990.H845_40	Acetolactate synthase 3 regulatory subunit; Cytoplasmic
H845_452	1296990.H845_452	Cellulose synthase 1; CytoplasmicMembrane
H845_458	1296990.H845_458	annotation not available
H845_469	1296990.H845_469	Segregation and condensation protein B; Participates in chromosomal partition during cell division. May act via the formation of a condensin-like complex containing Smc and ScpA that pull DNA away from mid-cell into both cell halves
H845_500	1296990.H845_500	Molybdopterin binding domain protein; [H] Coenzyme transport and metabolism; [V] Defense mechanisms; [R] general function prediction only; [E] Amino acid transport and metabolism; Cytoplasmic
H845_546	1296990.H845_546	Heat shock protein Hsp20; Cytoplasmic; Belongs to the small heat shock protein (HSP20) family
H845_585	1296990.H845_585	Membrane-bound lytic murein transglycosylase; [M] Cell wall/membrane/envelope biogenesis; [T] Signal transduction mechanisms; OuterMembrane
H845_596	1296990.H845_596	Cold shock protein; Cytoplasmic
H845_603	1296990.H845_603	annotation not available
H845_614	1296990.H845_614	Leucyl aminopeptidase; Cytoplasmic; Belongs to the peptidase M17 family
H845_616	1296990.H845_616	annotation not available
H845_674	1296990.H845_674	annotation not available
H845_679	1296990.H845_679	Uncharacterized protein; Cytoplasmic
H845_687	1296990.H845_687	Uncharacterized protein; Cytoplasmic
H845_867	1296990.H845_867	Beta sliding clamp; Confers DNA tethering and processivity to DNA polymerases and other proteins. Acts as a clamp, forming a ring around DNA (a reaction catalyzed by the clamp-loading complex) which diffuses in an ATP-independent manner freely and bidirectionally along dsDNA. Initially characterized for its ability to contact the catalytic subunit of DNA polymerase III (Pol III), a complex, multi…
H845_909	1296990.H845_909	annotation not available
aroQ	1296990.H845_3058	3-dehydroquinate dehydratase; Catalyzes a trans-dehydration via an enolate intermediate; Belongs to the type-II 3-dehydroquinase family
atpC	1296990.H845_2677	ATP synthase epsilon chain; Produces ATP from ADP in the presence of a proton gradient across the membrane
bamA	1296990.H845_527	Outer membrane protein assembly factor BamA; Part of the outer membrane protein assembly complex, which is involved in assembly and insertion of beta-barrel proteins into the outer membrane
cmk	1296990.H845_2276	Cytidylate kinase; Cytoplasmic; Belongs to the cytidylate kinase family. Type 1 subfamily
ctc	1296990.H845_2799	50S ribosomal protein L25; This is one of the proteins that binds to the 5S RNA in the ribosome where it forms part of the central protuberance
dcd	1296990.H845_2529	dCTP deaminase; Cytoplasmic; Belongs to the dCTP deaminase family
dut	1296990.H845_861	Deoxyuridine 5'-triphosphate nucleotidohydrolase; This enzyme is involved in nucleotide metabolism: it produces dUMP, the immediate precursor of thymidine nucleotides and it decreases the intracellular concentration of dUTP so that uracil cannot be incorporated into DNA; Belongs to the dUTPase family
efp	1296990.H845_2884	Elongation factor P; Involved in peptide bond synthesis. Stimulates efficient translation and peptide-bond synthesis on native or reconstituted 70S ribosomes in vitro. Probably functions indirectly by altering the affinity of the ribosome for aminoacyl-tRNA, thus increasing their reactivity as acceptors for peptidyl transferase
greA	1296990.H845_2175	Transcription elongation factor GreA; Necessary for efficient RNA polymerase transcription elongation past template-encoded arresting sites. The arresting sites in DNA have the property of trapping a certain fraction of elongating RNA polymerases that pass through, resulting in locked ternary complexes. Cleavage of the nascent transcript by cleavage factors such as GreA or GreB allows the resumpt…
groL	1296990.H845_595	60 kDa chaperonin; Prevents misfolding and promotes the refolding and proper assembly of unfolded polypeptides generated under stress conditions
groS	1296990.H845_594	10 kDa chaperonin; Binds to Cpn60 in the presence of Mg-ATP and suppresses the ATPase activity of the latter
grpE	1296990.H845_3148	Protein GrpE; Participates actively in the response to hyperosmotic and heat shock by preventing the aggregation of stress-denatured proteins, in association with DnaK and GrpE. It is the nucleotide exchange factor for DnaK and may function as a thermosensor. Unfolded proteins bind initially to DnaJ; upon interaction with the DnaJ-bound protein, DnaK hydrolyzes its bound ATP, resulting in the for…
gshB	1296990.H845_563	Glutathione synthetase; Cytoplasmic; Belongs to the prokaryotic GSH synthase family
hisA	1296990.H845_2477	1-(5-phosphoribosyl)-5-[(5-phosphoribosylamino)methylideneamino] imidazole-4-carboxamide isomerase; [M] Cell wall/membrane/envelope biogenesis; [R] general function prediction only; [E] Amino acid transport and metabolism; [L] Replication, recombination and repair; Cytoplasmic
hpf	1296990.H845_548	Ribosome hibernation promoting factor; Required for dimerization of active 70S ribosomes into 100S ribosomes in stationary phase; 100S ribosomes are translationally inactive and sometimes present during exponential growth
hrcA	1296990.H845_3034	Heat-inducible transcription repressor HrcA; Negative regulator of class I heat shock genes (grpE- dnaK-dnaJ and groELS operons). Prevents heat-shock induction of these operons
infA	1296990.H845_2533	Translation initiation factor IF-1; One of the essential components for the initiation of protein synthesis. Stabilizes the binding of IF-2 and IF-3 on the 30S subunit to which N-formylmethionyl-tRNA(fMet) subsequently binds. Helps modulate mRNA selection, yielding the 30S pre- initiation complex (PIC). Upon addition of the 50S ribosomal subunit IF-1, IF-2 and IF-3 are released leaving the mature…
lexA	1296990.H845_1702	LexA repressor; Represses a number of genes involved in the response to DNA damage (SOS response), including recA and lexA. In the presence of single-stranded DNA, RecA interacts with LexA causing an autocatalytic cleavage which disrupts the DNA-binding part of LexA, leading to derepression of the SOS regulon and eventually DNA repair
metZ	1296990.H845_2626	O-succinylhomoserine sulfhydrylase; Catalyzes the formation of L-homocysteine from O- succinyl-L-homoserine (OSHS) and hydrogen sulfide
moaC	1296990.H845_1902	Cyclic pyranopterin monophosphate synthase; Catalyzes the conversion of (8S)-3',8-cyclo-7,8- dihydroguanosine 5'-triphosphate to cyclic pyranopterin monophosphate (cPMP); Belongs to the MoaC family
ndk	1296990.H845_625	Nucleoside diphosphate kinase; Major role in the synthesis of nucleoside triphosphates other than ATP. The ATP gamma phosphate is transferred to the NDP beta phosphate via a ping-pong mechanism, using a phosphorylated active-site intermediate
nusG	1296990.H845_2685	Transcription termination/antitermination protein NusG; Participates in transcription elongation, termination and antitermination
pdxH	1296990.H845_1732	Pyridoxine/pyridoxamine 5'-phosphate oxidase; Catalyzes the oxidation of either pyridoxine 5'- phosphate (PNP) or pyridoxamine 5'-phosphate (PMP) into pyridoxal 5'-phosphate (PLP)
ppa	1296990.H845_2944	Inorganic pyrophosphatase; Catalyzes the hydrolysis of inorganic pyrophosphate (PPi) forming two phosphate ions
prfA	1296990.H845_1693	Peptide chain release factor 1; Peptide chain release factor 1 directs the termination of translation in response to the peptide chain termination codons UAG and UAA
prfB	1296990.H845_3031	Peptide chain release factor 2; Peptide chain release factor 2 directs the termination of translation in response to the peptide chain termination codons UGA and UAA
purE	1296990.H845_654	N5-carboxyaminoimidazole ribonucleotide mutase; Catalyzes the conversion of N5-carboxyaminoimidazole ribonucleotide (N5-CAIR) to 4-carboxy-5-aminoimidazole ribonucleotide (CAIR)
purS	1296990.H845_1887	Phosphoribosylformylglycinamidine synthase subunit PurS; Part of the phosphoribosylformylglycinamidine synthase complex involved in the purines biosynthetic pathway. Catalyzes the ATP-dependent conversion of formylglycinamide ribonucleotide (FGAR) and glutamine to yield formylglycinamidine ribonucleotide (FGAM) and glutamate. The FGAM synthase complex is composed of three subunits. PurQ produces …
ribH	1296990.H845_3209	6,7-dimethyl-8-ribityllumazine synthase; Catalyzes the formation of 6,7-dimethyl-8- ribityllumazine by condensation of 5-amino-6-(D- ribitylamino)uracil with 3,4-dihydroxy-2-butanone 4-phosphate. This is the penultimate step in the biosynthesis of riboflavin
rimM	1296990.H845_2095	Ribosome maturation factor RimM; An accessory protein needed during the final step in the assembly of 30S ribosomal subunit, possibly for assembly of the head region. Probably interacts with S19. Essential for efficient processing of 16S rRNA. May be needed both before and after RbfA during the maturation of 16S rRNA. It has affinity for free ribosomal 30S subunits but not for 70S ribosomes; Belo…
rimP	1296990.H845_3040	Ribosome maturation factor RimP; Required for maturation of 30S ribosomal subunits
rph	1296990.H845_3035	Ribonuclease PH; Phosphorolytic exoribonuclease that removes nucleotide residues following the -CCA terminus of tRNA and adds nucleotides to the ends of RNA molecules by using nucleoside diphosphates as substrates
rplF	1296990.H845_2218	50S ribosomal protein L6; This protein binds to the 23S rRNA, and is important in its secondary structure. It is located near the subunit interface in the base of the L7/L12 stalk, and near the tRNA binding site of the peptidyltransferase center
rplI	1296990.H845_2166	50S ribosomal protein L9; Binds to the 23S rRNA
rplJ	1296990.H845_2241	50S ribosomal protein L10; Forms part of the ribosomal stalk, playing a central role in the interaction of the ribosome with GTP-bound translation factors
rplP	1296990.H845_2226	50S ribosomal protein L16; Binds 23S rRNA and is also seen to make contacts with the A and possibly P site tRNAs
rplR	1296990.H845_2217	50S ribosomal protein L18; This is one of the proteins that binds and probably mediates the attachment of the 5S RNA into the large ribosomal subunit, where it forms part of the central protuberance
rplT	1296990.H845_1765	50S ribosomal protein L20; Binds directly to 23S ribosomal RNA and is necessary for the in vitro assembly process of the 50S ribosomal subunit. It is not involved in the protein synthesizing functions of that subunit
rplV	1296990.H845_2228	50S ribosomal protein L22; The globular domain of the protein is located near the polypeptide exit tunnel on the outside of the subunit, while an extended beta-hairpin is found that lines the wall of the exit tunnel in the center of the 70S ribosome
rplW	1296990.H845_2231	50S ribosomal protein L23; One of the early assembly proteins it binds 23S rRNA. One of the proteins that surrounds the polypeptide exit tunnel on the outside of the ribosome. Forms the main docking site for trigger factor binding to the ribosome
rplX	1296990.H845_2222	50S ribosomal protein L24; One of the proteins that surrounds the polypeptide exit tunnel on the outside of the subunit
rpmA	1296990.H845_1960	50S ribosomal protein L27; Cytoplasmic; Belongs to the bacterial ribosomal protein bL27 family
rpmB	1296990.H845_2070	50S ribosomal protein L28; Cytoplasmic; Belongs to the bacterial ribosomal protein bL28 family
rpmG	1296990.H845_1704	50S ribosomal protein L33; Cytoplasmic; Belongs to the bacterial ribosomal protein bL33 family
rpsF	1296990.H845_2168	30S ribosomal protein S6; Binds together with S18 to 16S ribosomal RNA
rpsJ	1296990.H845_2234	30S ribosomal protein S10; Involved in the binding of tRNA to the ribosomes
rpsM	1296990.H845_2211	30S ribosomal protein S13; Located at the top of the head of the 30S subunit, it contacts several helices of the 16S rRNA. In the 70S ribosome it contacts the 23S rRNA (bridge B1a) and protein L5 of the 50S subunit (bridge B1b), connecting the 2 subunits; these bridges are implicated in subunit movement. Contacts the tRNAs in the A and P- sites
rpsN	1296990.H845_2220	30S ribosomal protein S14; Binds 16S rRNA, required for the assembly of 30S particles and may also be responsible for determining the conformation of the 16S rRNA at the A site
rpsP	1296990.H845_2096	30S ribosomal protein S16; Cytoplasmic; Belongs to the bacterial ribosomal protein bS16 family
rpsR	1296990.H845_2167	30S ribosomal protein S18; Binds as a heterodimer with protein S6 to the central domain of the 16S rRNA, where it helps stabilize the platform of the 30S subunit
rsfS	1296990.H845_2794	Ribosomal silencing factor RsfS; Functions as a ribosomal silencing factor. Interacts with ribosomal protein L14 (rplN), blocking formation of intersubunit bridge B8. Prevents association of the 30S and 50S ribosomal subunits and the formation of functional ribosomes, thus repressing translation
secB	1296990.H845_583	Protein-export protein SecB; One of the proteins required for the normal export of preproteins out of the cell cytoplasm. It is a molecular chaperone that binds to a subset of precursor proteins, maintaining them in a translocation-competent state. It also specifically binds to its receptor SecA
tig	1296990.H845_2052	Trigger factor; Involved in protein export. Acts as a chaperone by maintaining the newly synthesized protein in an open conformation. Functions as a peptidyl-prolyl cis-trans isomerase; Belongs to the FKBP-type PPIase family. Tig subfamily
tolB	1296990.H845_2604	Protein TolB; Involved in the TonB-independent uptake of proteins
tsf	1296990.H845_1727	Elongation factor Ts; Associates with the EF-Tu.GDP complex and induces the exchange of GDP to GTP. It remains bound to the aminoacyl-tRNA.EF- Tu.GTP complex up to the GTP hydrolysis stage on the ribosome
tuf	1296990.H845_2235	Elongation factor Tu; This protein promotes the GTP-dependent binding of aminoacyl-tRNA to the A-site of ribosomes during protein biosynthesis
