# Supplementary material for: Unraveling the Role of Acetic Acid Bacteria Comparing Two Acetification Profiles From Natural Raw Materials: A Quantitative Approach in Komagataeibacter europaeus
Source: Front Microbiol. 2022 Apr 29;13:840119. doi: 10.3389/fmicb.2022.840119 (PMC9100681; doi:10.3389/fmicb.2022.840119)
Supplement: Supplementary file 8 [file Data_Sheet_3.XLSX]

## Sheet: FW_EL
File S3. List of exclusive proteins identified in the LC/MS-MS analysis in fine wine and beer vinegar profiles. The exclusive proteins were obtained by the difference between those in at least 50% out of total samples in at least one sampling time and those in each sampling time (EL, end of loading; UL, just before unloading). Several parameters of each protein are included as accession number (U…
Accession (Uniprot)	EL_1	EL_2	EL_3	Organism	Sum PEP Score	Coverage	# Peptides	# PSMs	# Unique Peptides	# AAs	MW [kDa]	calc. pI	emPAI	Score	Gene names	Protein names	Gene Ontology
A0A0D6MS73		2500000	3400000	Acetobacter aceti NBRC 14818	6806255138	1314741036	2	8	1	251	28488	577	359	2617473722		Two component transcriptional regulator ChvI	DNA binding [GO:0003677]; phosphorelay signal transduction system [GO:0000160]; regulation of transcription, DNA-templated [GO:0006355]
A0A0D6N5H4	440000		230000	Acetobacter cibinongensis 4H-1	6372278864	7510729614	2	8	1	466	50922	625	179	2175764692		Threonine synthase	pyridoxal phosphate binding [GO:0030170]; threonine synthase activity [GO:0004795]; threonine biosynthetic process [GO:0009088]
A0A511XHB2		240000	930000	Acetobacter oeni	7992211693	3238993711	11	173	3	318	3455	574	6079	5382701706		Abhydrolase_3 domain-containing protein	hydrolase activity [GO:0016787]
A0A511XJY9	4300000	28000000	23000000	Acetobacter oeni	2779698914	1316211878	6	29	1	623	68976	606	778	7321505713	aspS	Aspartate--tRNA(Asp/Asn) ligase (EC 6.1.1.23) (Aspartyl-tRNA synthetase) (AspRS) (Non-discriminating aspartyl-tRNA synthetase) (ND-AspRS)	cytoplasm [GO:0005737]; aspartate-tRNA ligase activity [GO:0004815]; aspartate-tRNA(Asn) ligase activity [GO:0050560]; ATP binding [GO:0005524]; nucleic acid binding [GO:0003676]; aspartyl-tRNA aminoacylation [GO:0006422]
A0A291PK26	3100000		12000000	Acetobacter tropicalis	305302198	1771058315	6	43	1	463	50478	61	655	1356674008		Succinate-semialdehyde dehydrogenase	oxidoreductase activity, acting on the aldehyde or oxo group of donors, NAD or NADP as acceptor [GO:0016620]
A0A257SA06	16000000	25000000		Acidiphilium sp. 21-60-14	2366016924	66359447	5	14	1	1085	115466	539	281	3855045605	carB	Carbamoyl-phosphate synthase large chain (EC 6.3.5.5) (Carbamoyl-phosphate synthetase ammonia chain)	ATP binding [GO:0005524]; carbamoyl-phosphate synthase (glutamine-hydrolyzing) activity [GO:0004088]; metal ion binding [GO:0046872]; 'de novo' UMP biosynthetic process [GO:0044205]; arginine biosynthetic process [GO:0006526]
A0A060QGM6		14000000	2600000	Asaia platycodi SF2.1	7285957791	2408376963	2	5	1	955	102549	555	118	1548068738	tal	Transaldolase (EC 2.2.1.2)	cytoplasm [GO:0005737]; glucose-6-phosphate isomerase activity [GO:0004347]; sedoheptulose-7-phosphate:D-glyceraldehyde-3-phosphate glyceronetransferase activity [GO:0004801]; gluconeogenesis [GO:0006094]; glycolytic process [GO:0006096]; pentose-phosphate shunt [GO:0006098]
G6EXJ4		590000000	300000000	Commensalibacter intestini A911	1286072991	3964646465	18	191	2	396	43168	531	25827	5150077088	tuf	Elongation factor Tu (EF-Tu)	cytoplasm [GO:0005737]; GTP binding [GO:0005525]; GTPase activity [GO:0003924]; translation elongation factor activity [GO:0003746]
A0A318N5R6		6200000	2000000	Commensalibacter sp. ESL0284	854856694	8235294118	2	10	1	340	37216	818	389	3173528075	asd	Aspartate-semialdehyde dehydrogenase (ASA dehydrogenase) (ASADH) (EC 1.2.1.11) (Aspartate-beta-semialdehyde dehydrogenase)	aspartate-semialdehyde dehydrogenase activity [GO:0004073]; NAD binding [GO:0051287]; NADP binding [GO:0050661]; protein dimerization activity [GO:0046983]; 'de novo' L-methionine biosynthetic process [GO:0071266]; diaminopimelate biosynthetic process [GO:0019877]; isoleucine biosynthetic process [GO:0009097]; lysine biosynthetic process via diaminopimelate [GO:0009089]; threonine biosynthetic pr…
A9HEA3	65000000	6200000	20000000	Gluconacetobacter diazotrophicus (strain ATCC 49037 / DSM 5601 / PAl5)	1683447236	3495297806	27	268	2	638	67139	501	6988	872946197	dnaK	Chaperone protein DnaK (HSP70) (Heat shock 70 kDa protein) (Heat shock protein 70)	ATP binding [GO:0005524]; unfolded protein binding [GO:0051082]; protein folding [GO:0006457]
B5ZHJ4		2700000	4900000	Gluconacetobacter diazotrophicus (strain ATCC 49037 / DSM 5601 / PAl5)	4221833855	2510548523	11	47	1	474	5401	72	1712	1193984704		Hopanoid biosynthesis associated radical SAM protein HpnJ	catalytic activity [GO:0003824]; iron-sulfur cluster binding [GO:0051536]
A0A318PV99		14000000	4700000	Gluconacetobacter entanii	1534213542	1300813008	4	16	1	492	55463	587	433	370063889	zwf	Glucose-6-phosphate 1-dehydrogenase (G6PD) (EC 1.1.1.49)	glucose-6-phosphate dehydrogenase activity [GO:0004345]; NADP binding [GO:0050661]; glucose metabolic process [GO:0006006]; pentose-phosphate shunt [GO:0006098]
A0A370G4E1	1100000		11000000	Gluconacetobacter liquefaciens (Acetobacter liquefaciens)	9174939956	2340136054	21	180	1	735	806	655	3479	4348787669		Alcohol dehydrogenase (Cytochrome c)	membrane [GO:0016020]; outer membrane-bounded periplasmic space [GO:0030288]; calcium ion binding [GO:0005509]; electron transfer activity [GO:0009055]; heme binding [GO:0020037]; oxidoreductase activity, acting on CH-OH group of donors [GO:0016614]
F3S9U8		3000000	3700000	Gluconacetobacter sp. SXCC-1	1630319884	175074184	3	19	1	337	35693	515	848	7103817534		Uncharacterized protein
F3SB47	1300000	11000000		Gluconacetobacter sp. SXCC-1	1158608213	1483375959	4	11	1	391	41632	56	425	3107606697	dxr	1-deoxy-D-xylulose 5-phosphate reductoisomerase (DXP reductoisomerase) (EC 1.1.1.267) (1-deoxyxylulose-5-phosphate reductoisomerase) (2-C-methyl-D-erythritol 4-phosphate synthase)	1-deoxy-D-xylulose-5-phosphate reductoisomerase activity [GO:0030604]; isomerase activity [GO:0016853]; metal ion binding [GO:0046872]; NADPH binding [GO:0070402]; isopentenyl diphosphate biosynthetic process, methylerythritol 4-phosphate pathway [GO:0019288]; terpenoid biosynthetic process [GO:0016114]
F3SCF3		1200000	650000	Gluconacetobacter sp. SXCC-1	5502726814	3333333333	2	4	2	690	7325	514	11	1041959548	dnaX	DNA polymerase III subunit gamma/tau (EC 2.7.7.7)	DNA polymerase III complex [GO:0009360]; ATP binding [GO:0005524]; DNA binding [GO:0003677]; DNA-directed DNA polymerase activity [GO:0003887]; DNA replication [GO:0006260]
G6XG31		28000000	23000000	Gluconobacter morbifer G707	1588374295	9348914858	4	17	1	599	66638	564	401	5202174354	aspS	Aspartate--tRNA(Asp/Asn) ligase (EC 6.1.1.23) (Aspartyl-tRNA synthetase) (AspRS) (Non-discriminating aspartyl-tRNA synthetase) (ND-AspRS)	cytoplasm [GO:0005737]; aspartate-tRNA ligase activity [GO:0004815]; aspartate-tRNA(Asn) ligase activity [GO:0050560]; ATP binding [GO:0005524]; nucleic acid binding [GO:0003676]; aspartyl-tRNA aminoacylation [GO:0006422]
A0A149SRP8	2000000	3900000	2400000	Gluconobacter thailandicus	7399528105	1241610738	2	4	2	298	32193	654	425	1297354722		LysR family transcriptional regulator	DNA-binding transcription factor activity [GO:0003700]
A0A4P5NRU9	12000000	24000000	55000000	Komagataeibacter diospyri	1144283364	522	21	89	1	500	53717	692	11589	2974521844	guaB	Inosine-5'-monophosphate dehydrogenase (IMP dehydrogenase) (IMPD) (IMPDH) (EC 1.1.1.205)	IMP dehydrogenase activity [GO:0003938]; metal ion binding [GO:0046872]; nucleotide binding [GO:0000166]; GMP biosynthetic process [GO:0006177]
A0A4V0WMS8	6800000	3800000	9100000	Komagataeibacter diospyri	16758456	1076923077	4	13	2	390	422	657	52	4083058548	serC	Phosphoserine aminotransferase	O-phospho-L-serine:2-oxoglutarate aminotransferase activity [GO:0004648]; L-serine biosynthetic process [GO:0006564]
A0A4P5NS48	950000	1200000	840000	Komagataeibacter diospyri	8524799645	1300309598	3	10	3	323	34356	695	501	2690691972	murB	UDP-N-acetylenolpyruvoylglucosamine reductase (EC 1.3.1.98) (UDP-N-acetylmuramate dehydrogenase)	cytoplasm [GO:0005737]; FAD binding [GO:0071949]; UDP-N-acetylmuramate dehydrogenase activity [GO:0008762]; cell cycle [GO:0007049]; cell division [GO:0051301]; cell wall organization [GO:0071555]; peptidoglycan biosynthetic process [GO:0009252]; regulation of cell shape [GO:0008360]
A0A4P5NSS7		4200000	320000	Komagataeibacter diospyri	4804813785	1029810298	2	3	2	369	39334	68	202	8065101147	mnmA	tRNA-specific 2-thiouridylase MnmA (EC 2.8.1.13)	cytoplasm [GO:0005737]; ATP binding [GO:0005524]; methyltransferase activity [GO:0008168]; sulfurtransferase activity [GO:0016783]; tRNA binding [GO:0000049]; methylation [GO:0032259]; tRNA modification [GO:0006400]
A0A0M0ELD5	300000	1500000	4700000	Komagataeibacter europaeus (Gluconacetobacter europaeus)	1331245636	4704570792	32	123	2	897	100818	572	3703	3441532843	valS	Valine--tRNA ligase (EC 6.1.1.9) (Valyl-tRNA synthetase) (ValRS)	cytoplasm [GO:0005737]; aminoacyl-tRNA editing activity [GO:0002161]; ATP binding [GO:0005524]; valine-tRNA ligase activity [GO:0004832]; valyl-tRNA aminoacylation [GO:0006438]
A0A0M0EFI3	630000	2200000	5000000	Komagataeibacter europaeus (Gluconacetobacter europaeus)	7616052216	3687002653	9	62	1	377	39167	605	9	2079610105	gcvT3	Aminomethyltransferase (EC 2.1.2.10)	aminomethyltransferase activity [GO:0004047]; transaminase activity [GO:0008483]; glycine catabolic process [GO:0006546]; methylation [GO:0032259]
A0A0M0EGU5		610000	2600000	Komagataeibacter europaeus (Gluconacetobacter europaeus)	7325112443	3483965015	19	61	2	686	74214	583	2639	1713484668	glyS	Glycine--tRNA ligase beta subunit (EC 6.1.1.14) (Glycyl-tRNA synthetase beta subunit) (GlyRS)	cytoplasm [GO:0005737]; arginine-tRNA ligase activity [GO:0004814]; ATP binding [GO:0005524]; glycine-tRNA ligase activity [GO:0004820]; arginyl-tRNA aminoacylation [GO:0006420]; glycyl-tRNA aminoacylation [GO:0006426]
A0A0M0EID6		2500000	3000000	Komagataeibacter europaeus (Gluconacetobacter europaeus)	856224433	2368073879	22	53	1	1516	163223	552	768	1581606278	smc	Chromosome partition protein Smc	cytoplasm [GO:0005737]; ATP binding [GO:0005524]; DNA binding [GO:0003677]; chromosome condensation [GO:0030261]; DNA replication [GO:0006260]; sister chromatid cohesion [GO:0007062]
A0A0M0EHC2		14000000	13000000	Komagataeibacter europaeus (Gluconacetobacter europaeus)	4004446055	2369077307	4	16	1	401	43118	576	2162	6275393081	mauB1	Methylamine dehydrogenase heavy chain (EC 1.4.9.1)	periplasmic space [GO:0042597]; amine dehydrogenase activity [GO:0030058]; methylamine dehydrogenase (amicyanin) activity [GO:0052876]
A0A0M0EEN4	370000	1000000	8100000	Komagataeibacter europaeus (Gluconacetobacter europaeus)	2203492536	2530712531	6	20	3	407	43136	526	738	5426274741	pgk	Phosphoglycerate kinase (EC 2.7.2.3)	cytoplasm [GO:0005737]; ATP binding [GO:0005524]; phosphoglycerate kinase activity [GO:0004618]; glycolytic process [GO:0006096]
A0A0M0EGY8	2900000	7900000	6700000	Komagataeibacter europaeus (Gluconacetobacter europaeus)	2111517103	3197492163	8	20	3	319	35154	853	131	5098234677	ribF	Riboflavin biosynthesis protein [Includes: Riboflavin kinase (EC 2.7.1.26) (Flavokinase);FMN adenylyltransferase (EC 2.7.7.2) (FAD pyrophosphorylase) (FAD synthase)]	ATP binding [GO:0005524]; FMN adenylyltransferase activity [GO:0003919]; riboflavin kinase activity [GO:0008531]; FAD biosynthetic process [GO:0006747]; FMN biosynthetic process [GO:0009398]; riboflavin biosynthetic process [GO:0009231]
A0A0M0EI77	2600000	3800000	4000000	Komagataeibacter europaeus (Gluconacetobacter europaeus)	333153534	1215423303	9	16	9	1193	129339	621	334	5045461857	addA	ATP-dependent helicase/nuclease subunit A (EC 3.1.-.-) (EC 3.6.4.12)	ATP binding [GO:0005524]; DNA binding [GO:0003677]; DNA helicase activity [GO:0003678]; exonuclease activity [GO:0004527]; DNA repair [GO:0006281]
A0A0M0EMB2		12000000	21000000	Komagataeibacter europaeus (Gluconacetobacter europaeus)	2504022664	2886597938	9	14	9	485	5174	544	1043	4371498752		Putative FAD-linked oxidoreductase (EC 1.-.-.-)	FAD binding [GO:0071949]; oxidoreductase activity [GO:0016491]
A0A0M0EKB4	1500000	6800000	1900000	Komagataeibacter europaeus (Gluconacetobacter europaeus)	2722095584	3277909739	7	13	7	421	45127	601	1154	3686119175	ribBA	Multifunctional fusion protein [Includes: GTP cyclohydrolase-2 (EC 3.5.4.25) (GTP cyclohydrolase II);3,4-dihydroxy-2-butanone 4-phosphate synthase (DHBP synthase) (EC 4.1.99.12)]	3,4-dihydroxy-2-butanone-4-phosphate synthase activity [GO:0008686]; GTP binding [GO:0005525]; GTP cyclohydrolase II activity [GO:0003935]; magnesium ion binding [GO:0000287]; manganese ion binding [GO:0030145]; zinc ion binding [GO:0008270]; riboflavin biosynthetic process [GO:0009231]
A0A0M0EFW5		2100000	1500000	Komagataeibacter europaeus (Gluconacetobacter europaeus)	2573059697	9029345372	8	13	8	1329	142971	695	27	3660203338	acsC2	Cellulose synthase operon protein C	cell outer membrane [GO:0009279]; cellulose biosynthetic process [GO:0030244]; UDP-glucose metabolic process [GO:0006011]
A0A0M0EL58		16000000	13000000	Komagataeibacter europaeus (Gluconacetobacter europaeus)	2129317507	2659574468	7	17	2	470	51625	643	931	3535604095	egtA	Glutamate--cysteine ligase (EC 6.3.2.2)	ATP binding [GO:0005524]; glutamate-cysteine ligase activity [GO:0004357]; glutathione biosynthetic process [GO:0006750]
A0A0M0EK11		2400000	1800000	Komagataeibacter europaeus (Gluconacetobacter europaeus)	1910203007	1332263242	6	12	6	623	67022	708	401	332855227	mnmG	tRNA uridine 5-carboxymethylaminomethyl modification enzyme MnmG (Glucose-inhibited division protein A)	cytoplasm [GO:0005737]; flavin adenine dinucleotide binding [GO:0050660]; tRNA wobble uridine modification [GO:0002098]
A0A0M0EFE5	75000	2000000		Komagataeibacter europaeus (Gluconacetobacter europaeus)	1522379645	2765151515	4	12	2	264	27518	721	1031	3192912269	yfiH	Polyphenol oxidase	adenosine deaminase activity [GO:0004000]; metal ion binding [GO:0046872]; S-methyl-5-thioadenosine phosphorylase activity [GO:0017061]
A0A0M0EL25		3400000	1800000	Komagataeibacter europaeus (Gluconacetobacter europaeus)	1827233554	1405940594	4	8	4	505	55587	582	377	3147507453	dnaC1	Replicative DNA helicase (EC 3.6.4.12)	primosome complex [GO:1990077]; ATP binding [GO:0005524]; DNA binding [GO:0003677]; DNA helicase activity [GO:0003678]; DNA replication, synthesis of RNA primer [GO:0006269]
A0A0M0EH11	2100000	3200000	3600000	Komagataeibacter europaeus (Gluconacetobacter europaeus)	1393081966	7754010695	4	9	4	748	81756	746	239	2793228817	rnr	Ribonuclease R (RNase R) (EC 3.1.13.1)	cytoplasm [GO:0005737]; exoribonuclease II activity [GO:0008859]; RNA binding [GO:0003723]
A0A0M0EH20		540000	390000	Komagataeibacter europaeus (Gluconacetobacter europaeus)	1295080185	1989528796	5	16	1	382	43299	703	585	2745769596	tsaM11	Toluene-4-sulfonate monooxygenase system iron-sulfur subunit TsaM1 (EC 1.14.14.-)	2 iron, 2 sulfur cluster binding [GO:0051537]; metal ion binding [GO:0046872]; monooxygenase activity [GO:0004497]
A0A0M0EHI6	2000000	3200000	4200000	Komagataeibacter europaeus (Gluconacetobacter europaeus)	1169932438	5836575875	2	9	2	514	56867	637	35	2707490337	sacC	Levanase (EC 3.2.1.80)	fructan beta-fructosidase activity [GO:0051669]; carbohydrate metabolic process [GO:0005975]
A0A0M0EIH5	750000	3600000	3600000	Komagataeibacter europaeus (Gluconacetobacter europaeus)	1185813016	7219251337	4	9	4	748	83595	539	245	247425282	uvrB	UvrABC system protein B (Protein UvrB) (Excinuclease ABC subunit B)	cytoplasm [GO:0005737]; excinuclease repair complex [GO:0009380]; ATP binding [GO:0005524]; ATPase activity [GO:0016887]; DNA binding [GO:0003677]; excinuclease ABC activity [GO:0009381]; nucleotide-excision repair [GO:0006289]; SOS response [GO:0009432]
A0A0M0EIY5		320000	340000	Komagataeibacter europaeus (Gluconacetobacter europaeus)	1124951494	2074592075	4	7	4	429	44648	91	425	2050686359		Uncharacterized protein
A0A2Z5WH05	11000000	8100000	5500000	Komagataeibacter europaeus (Gluconacetobacter europaeus)	1187827474	1542168675	3	6	3	415	4577	679	413	1997219849	metX	Homoserine O-acetyltransferase (HAT) (EC 2.3.1.31) (Homoserine transacetylase) (HTA)	cytoplasm [GO:0005737]; homoserine O-acetyltransferase activity [GO:0004414]; methionine biosynthetic process [GO:0009086]
A0A0M0EGZ1		1000000	1800000	Komagataeibacter europaeus (Gluconacetobacter europaeus)	1400418019	1053435115	4	6	4	655	72572	74	259	1935137463	gyrB2	DNA topoisomerase 4 subunit B (EC 5.6.2.2) (Topoisomerase IV subunit B)	chromosome [GO:0005694]; ATP binding [GO:0005524]; DNA binding [GO:0003677]; DNA topoisomerase type II (double strand cut, ATP-hydrolyzing) activity [GO:0003918]; chromosome segregation [GO:0007059]; DNA topological change [GO:0006265]
A0A0M0EGP6	1100000	530000	1400000	Komagataeibacter europaeus (Gluconacetobacter europaeus)	1235849615	2593360996	5	6	5	482	52149	718	403	1775278091	aldA	Lactaldehyde dehydrogenase (EC 1.2.1.21) (EC 1.2.1.22)	glycolaldehyde dehydrogenase activity [GO:0050569]; lactaldehyde dehydrogenase activity [GO:0008911]
A0A0M0EDG2	740000	2800000	5800000	Komagataeibacter europaeus (Gluconacetobacter europaeus)	1101794661	520754717	4	6	4	1325	142754	58	147	1681281495	narB	Nitrate reductase (EC 1.7.99.4)	4 iron, 4 sulfur cluster binding [GO:0051539]; FMN binding [GO:0010181]; metal ion binding [GO:0046872]; molybdopterin cofactor binding [GO:0043546]; nitrate reductase activity [GO:0008940]; cysteine biosynthetic process [GO:0019344]; nitrate assimilation [GO:0042128]
A0A0M0EGP5	730000		1100000	Komagataeibacter europaeus (Gluconacetobacter europaeus)	8055564423	8	3	4	3	675	69908	627	304	1153325701	bglB1	Thermostable beta-glucosidase B (EC 3.2.1.21)	beta-glucosidase activity [GO:0008422]; scopolin beta-glucosidase activity [GO:0102483]; carbohydrate metabolic process [GO:0005975]
A0A0M0EM06	3700000	9600000		Komagataeibacter europaeus (Gluconacetobacter europaeus)	7014161456	6153846154	2	4	1	390	40675	696	438	1084936762	estB	Esterase EstB (EC 3.1.1.-)	peptidase activity [GO:0008233]
A0A0M0EIE0		2600000	4400000	Komagataeibacter europaeus (Gluconacetobacter europaeus)	6800544875	7675906183	2	4	2	469	50578	635	77	1083601189	miaB	tRNA-2-methylthio-N(6)-dimethylallyladenosine synthase (EC 2.8.4.3) ((Dimethylallyl)adenosine tRNA methylthiotransferase MiaB) (tRNA-i(6)A37 methylthiotransferase)	cytoplasm [GO:0005737]; 4 iron, 4 sulfur cluster binding [GO:0051539]; metal ion binding [GO:0046872]; methylthiotransferase activity [GO:0035596]; tRNA modification [GO:0006400]
A0A0M0EFG5	1200000	3500000	1900000	Komagataeibacter europaeus (Gluconacetobacter europaeus)	5326634837	6386292835	2	3	2	642	69036	772	136	105975709	tkt3	Transketolase (EC 2.2.1.1)	metal ion binding [GO:0046872]; transketolase activity [GO:0004802]
A0A0M0EF79		2300000	2300000	Komagataeibacter europaeus (Gluconacetobacter europaeus)	4001293516	6676783005	2	3	2	659	71434	616	129	7055646658	slt5	Soluble lytic murein transglycosylase (EC 4.2.2.-)	membrane [GO:0016020]; periplasmic space [GO:0042597]; hydrolase activity, hydrolyzing O-glycosyl compounds [GO:0004553]; lyase activity [GO:0016829]; lytic transglycosylase activity [GO:0008933]; peptidoglycan metabolic process [GO:0000270]
A0A0M0EIU7	610000	1400000	1700000	Komagataeibacter europaeus (Gluconacetobacter europaeus)	3517784643	1578947368	2	3	2	228	25145	634	311	6975119352		NUDIX domain protein	hydrolase activity [GO:0016787]
A0A0M0EJU2		720000	1300000	Komagataeibacter europaeus (Gluconacetobacter europaeus)	6690386247	1313559322	2	2	2	236	25697	1089	311	5896640539		DUF448 domain-containing protein
A0A0M0ELK3		2000000	8000000	Komagataeibacter europaeus (Gluconacetobacter europaeus)	4687019751	8052434457	2	2	2	534	57534	689	172	5152357817		Tannase and feruloyl esterase	carboxylic ester hydrolase activity [GO:0052689]; metal ion binding [GO:0046872]
A0A0D6Q081	15000000	12000000	34000000	Komagataeibacter europaeus NBRC 3261	1439931228	4347826087	31	128	1	897	100811	563	3954	358026325	valS	Valine--tRNA ligase (EC 6.1.1.9) (Valyl-tRNA synthetase) (ValRS)	cytoplasm [GO:0005737]; aminoacyl-tRNA editing activity [GO:0002161]; ATP binding [GO:0005524]; valine-tRNA ligase activity [GO:0004832]; valyl-tRNA aminoacylation [GO:0006438]
A0A0D6Q2J6		2800000	5500000	Komagataeibacter europaeus NBRC 3261	1035912543	3257023933	19	70	1	961	101838	629	2981	2317771149	gcvP	Glycine dehydrogenase (decarboxylating) (EC 1.4.4.2) (Glycine cleavage system P-protein) (Glycine decarboxylase) (Glycine dehydrogenase (aminomethyl-transferring))	glycine dehydrogenase (decarboxylating) activity [GO:0004375]; glycine decarboxylation via glycine cleavage system [GO:0019464]
A0A0D6PYC2	5600000	20000000	23000000	Komagataeibacter europaeus NBRC 3261	1036415203	3292682927	16	56	4	820	87088	554	2615	1987880747	pheT	Phenylalanine--tRNA ligase beta subunit (EC 6.1.1.20) (Phenylalanyl-tRNA synthetase beta subunit) (PheRS)	cytoplasm [GO:0005737]; ATP binding [GO:0005524]; magnesium ion binding [GO:0000287]; phenylalanine-tRNA ligase activity [GO:0004826]; tRNA binding [GO:0000049]; phenylalanyl-tRNA aminoacylation [GO:0006432]
A0A0D6Q1I2		3300000	1900000	Komagataeibacter europaeus NBRC 3261	8714898557	2359454855	21	60	1	1174	130138	654	104	1755141764		AAA_27 domain-containing protein
A0A0D6PZH1	250000	6100000	7200000	Komagataeibacter europaeus NBRC 3261	9365322905	2453825858	23	56	2	1516	163008	553	81	1753606724	smc	Chromosome partition protein Smc	cytoplasm [GO:0005737]; ATP binding [GO:0005524]; DNA binding [GO:0003677]; chromosome condensation [GO:0030261]; DNA replication [GO:0006260]; sister chromatid cohesion [GO:0007062]
A0A0D6Q3I1	5800000	2900000		Komagataeibacter europaeus NBRC 3261	5764023437	3150684932	12	43	2	511	56913	596	2054	1318273727	zwf	Glucose-6-phosphate 1-dehydrogenase (G6PD) (EC 1.1.1.49)	glucose-6-phosphate dehydrogenase activity [GO:0004345]; NADP binding [GO:0050661]; glucose metabolic process [GO:0006006]; pentose-phosphate shunt [GO:0006098]
A0A0D6PY23	1200000		4900000	Komagataeibacter europaeus NBRC 3261	3307693908	1381322957	8	29	1	514	58924	6	995	9561172342		Cobalamin (Vitamin B12) binding protein	catalytic activity [GO:0003824]; cobalamin binding [GO:0031419]; iron-sulfur cluster binding [GO:0051536]; metal ion binding [GO:0046872]
A0A0D6PZ21		5400000	12000000	Komagataeibacter europaeus NBRC 3261	4483402099	1460084034	7	20	7	952	99865	507	1106	6867866325		Trehalase	alpha,alpha-trehalase activity [GO:0004555]; trehalose metabolic process [GO:0005991]
A0A0D6PZX6	3300000	7900000	6800000	Komagataeibacter europaeus NBRC 3261	2913724541	120596206	5	12	5	738	81588	642	311	5815547764	parC	DNA topoisomerase 4 subunit A (EC 5.6.2.2) (Topoisomerase IV subunit A)	chromosome [GO:0005694]; extrinsic component of plasma membrane [GO:0019897]; ATP binding [GO:0005524]; DNA binding [GO:0003677]; DNA topoisomerase type II (double strand cut, ATP-hydrolyzing) activity [GO:0003918]; chromosome segregation [GO:0007059]; DNA topological change [GO:0006265]
A0A0D6Q0D7	4500000	5700000	9600000	Komagataeibacter europaeus NBRC 3261	394091352	3305785124	10	17	10	484	54302	68	2162	4719905555	amn	AMP nucleosidase (EC 3.2.2.4)	AMP nucleosidase activity [GO:0008714]; AMP salvage [GO:0044209]; nucleoside metabolic process [GO:0009116]
A0A0D6PUY6		12000000	14000000	Komagataeibacter europaeus NBRC 3261	1403506572	2025723473	3	10	3	311	33262	854	438	3572104383	fmt	Methionyl-tRNA formyltransferase (EC 2.1.2.9)	methionyl-tRNA formyltransferase activity [GO:0004479]
A0A0D6Q2C6	850000	6300000	3500000	Komagataeibacter europaeus NBRC 3261	2005821429	1801801802	5	11	5	444	47494	988	532	340280689		RNA methyltransferase	methyltransferase activity [GO:0008168]; RNA binding [GO:0003723]; regulation of transcription, DNA-templated [GO:0006355]; RNA methylation [GO:0001510]
A0A0D6Q072	2500000	4300000	3300000	Komagataeibacter europaeus NBRC 3261	1187484454	2463768116	4	9	4	276	29145	567	848	2722855639		PEP_hydrolase domain-containing protein	catalytic activity [GO:0003824]
A0A0D6Q5T0	1600000	3200000	2100000	Komagataeibacter europaeus NBRC 3261	1242752805	1682926829	5	9	5	410	44113	873	65	2678953791		Hydroxylase/monooxygenase, ubiquinone biosynthesis hydroxylase	FAD binding [GO:0071949]; oxidoreductase activity, acting on paired donors, with incorporation or reduction of molecular oxygen, NAD(P)H as one donor, and incorporation of one atom of oxygen [GO:0016709]; ubiquinone biosynthetic process [GO:0006744]
A0A0D6PZ36		2900000	2200000	Komagataeibacter europaeus NBRC 3261	1390324428	9447852761	5	8	5	815	90102	925	224	2527002215		RNA helicase	ATP binding [GO:0005524]; RNA helicase activity [GO:0003724]
A0A0D6Q0F3	3300000	1600000	2900000	Komagataeibacter europaeus NBRC 3261	1457857275	1751412429	4	10	4	354	37085	607	1069	2406628108		Uncharacterized protein
A0A0D6PYS8	5300000	2100000	1800000	Komagataeibacter europaeus NBRC 3261	1700315786	1934156379	5	9	5	486	52314	1058	468	2403292489	xseA	Exodeoxyribonuclease 7 large subunit (EC 3.1.11.6) (Exodeoxyribonuclease VII large subunit) (Exonuclease VII large subunit)	cytoplasm [GO:0005737]; exodeoxyribonuclease VII complex [GO:0009318]; exodeoxyribonuclease VII activity [GO:0008855]; nucleic acid binding [GO:0003676]; DNA catabolic process [GO:0006308]
A0A0D6PZ27	300000	1700000	3700000	Komagataeibacter europaeus NBRC 3261	1492382351	1192307692	4	8	4	520	57596	582	487	2342276931	prfC	Peptide chain release factor 3 (RF-3)	cytoplasm [GO:0005737]; GTP binding [GO:0005525]; GTPase activity [GO:0003924]; translation release factor activity, codon specific [GO:0016149]; regulation of translational termination [GO:0006449]
A0A0D6PVE9	2300000	4800000	3500000	Komagataeibacter europaeus NBRC 3261	1320680462	1297169811	3	7	3	424	45915	705	304	2325733757		Methyltransferase	methyltransferase activity [GO:0008168]; methylation [GO:0032259]
A0A0D6Q0X5	220000	6700000	680000	Komagataeibacter europaeus NBRC 3261	9474431674	1993865031	3	7	3	326	36397	574	413	2166602445	nadA	Quinolinate synthase A (EC 2.5.1.72)	cytoplasm [GO:0005737]; 4 iron, 4 sulfur cluster binding [GO:0051539]; metal ion binding [GO:0046872]; quinolinate synthetase A activity [GO:0008987]; NAD biosynthetic process [GO:0009435]
A0A0D6Q084	6500000	2600000	680000	Komagataeibacter europaeus NBRC 3261	1306130817	2517985612	4	7	4	278	29073	793	161	2074016976	proC	Pyrroline-5-carboxylate reductase (P5C reductase) (P5CR) (EC 1.5.1.2) (PCA reductase)	cytoplasm [GO:0005737]; pyrroline-5-carboxylate reductase activity [GO:0004735]; L-proline biosynthetic process [GO:0055129]
A0A0D6PXT5		7700000	2700000	Komagataeibacter europaeus NBRC 3261	1388417591	1257861635	4	7	4	477	51247	602	407	2008114338		Aromatic-L-amino-acid decarboxylase	carboxy-lyase activity [GO:0016831]; pyridoxal phosphate binding [GO:0030170]; cellular amino acid metabolic process [GO:0006520]
A0A0D6PYE7	4300000	7500000	5700000	Komagataeibacter europaeus NBRC 3261	9471692394	1411042945	4	8	4	326	36054	654	624	2001205468	hldD	ADP-L-glycero-D-manno-heptose-6-epimerase (EC 5.1.3.20) (ADP-L-glycero-beta-D-manno-heptose-6-epimerase) (ADP-glyceromanno-heptose 6-epimerase) (ADP-hep 6-epimerase) (AGME)	ADP-glyceromanno-heptose 6-epimerase activity [GO:0008712]; NADP binding [GO:0050661]; ADP-L-glycero-beta-D-manno-heptose biosynthetic process [GO:0097171]; carbohydrate metabolic process [GO:0005975]
A0A0D6PZL1	850000	5900000	3900000	Komagataeibacter europaeus NBRC 3261	1130906372	2267080745	4	7	4	322	35599	531	968	1783627009	thrB	Homoserine kinase (HK) (HSK) (EC 2.7.1.39)	ATP binding [GO:0005524]; homoserine kinase activity [GO:0004413]; threonine biosynthetic process [GO:0009088]
A0A0D6PY63	300000	1200000		Komagataeibacter europaeus NBRC 3261	8991392096	1802120141	3	6	3	283	31368	624	468	1730262947		Thiamin pyrophosphokinase	hydrolase activity [GO:0016787]; kinase activity [GO:0016301]
A0A0D6Q240	780000	1900000	1700000	Komagataeibacter europaeus NBRC 3261	914896383	1525974026	3	5	3	308	32502	677	369	1430187678	ispE	4-diphosphocytidyl-2-C-methyl-D-erythritol kinase (CMK) (EC 2.7.1.148) (4-(cytidine-5'-diphospho)-2-C-methyl-D-erythritol kinase)	4-(cytidine 5'-diphospho)-2-C-methyl-D-erythritol kinase activity [GO:0050515]; ATP binding [GO:0005524]; isopentenyl diphosphate biosynthetic process, methylerythritol 4-phosphate pathway [GO:0019288]; terpenoid biosynthetic process [GO:0016114]
A0A0D6PZE5	800000	2200000	200000	Komagataeibacter europaeus NBRC 3261	8967805871	1288888889	2	4	2	225	24443	746	468	1134584141	psd	Phosphatidylserine decarboxylase proenzyme (EC 4.1.1.65) [Cleaved into: Phosphatidylserine decarboxylase alpha chain;Phosphatidylserine decarboxylase beta chain]	plasma membrane [GO:0005886]; phosphatidylserine decarboxylase activity [GO:0004609]; phosphatidylethanolamine biosynthetic process [GO:0006646]
A0A0D6Q4X9		370000	8100000	Komagataeibacter europaeus NBRC 3261	652676755	1075268817	2	4	2	279	29786	606	311	1127307868		Inositol monophosphatase	inositol phosphate dephosphorylation [GO:0046855]
A0A0D6PWF5	1600000	3400000		Komagataeibacter europaeus NBRC 3261	8690632348	7723577236	3	5	3	492	54648	599	346	1021984291		Mannose-1-phosphate guanylyltransferase/mannose-6-phosphate isomerase	GTP binding [GO:0005525]; isomerase activity [GO:0016853]; mannose-1-phosphate guanylyltransferase activity [GO:0004475]; polysaccharide biosynthetic process [GO:0000271]
A0A0D6Q2N2	1500000	1200000	2600000	Komagataeibacter europaeus NBRC 3261	6418051845	1078947368	3	4	3	380	40751	681	389	1017693067	purK	N5-carboxyaminoimidazole ribonucleotide synthase (N5-CAIR synthase) (EC 6.3.4.18) (5-(carboxyamino)imidazole ribonucleotide synthetase)	5-(carboxyamino)imidazole ribonucleotide synthase activity [GO:0034028]; ATP binding [GO:0005524]; metal ion binding [GO:0046872]; phosphoribosylaminoimidazole carboxylase activity [GO:0004638]; 'de novo' IMP biosynthetic process [GO:0006189]
A0A0D6PXW5	2400000	2400000		Komagataeibacter europaeus NBRC 3261	838659618	2821782178	2	3	2	202	21622	61	931	9707528353		Glutathione S-transferase	transferase activity [GO:0016740]
A0A0D6PW20	960000	3900000	3000000	Komagataeibacter europaeus NBRC 3261	3268003077	775862069	2	4	2	464	47466	647	194	9555060387	trpD	Anthranilate phosphoribosyltransferase (EC 2.4.2.18)	anthranilate phosphoribosyltransferase activity [GO:0004048]; magnesium ion binding [GO:0000287]; tryptophan biosynthetic process [GO:0000162]
A0A0D6Q581		2300000	2100000	Komagataeibacter europaeus NBRC 3261	6344043326	9433962264	2	3	2	318	3577	627	259	9453551769		Proline iminopeptidase (PIP) (EC 3.4.11.5) (Prolyl aminopeptidase)	cytoplasm [GO:0005737]; aminopeptidase activity [GO:0004177]
A0A0D6PXT9	1900000	9300000	7600000	Komagataeibacter europaeus NBRC 3261	6236197424	8415841584	2	4	2	404	43077	687	245	8979547739		Aminotransferase	pyridoxal phosphate binding [GO:0030170]; transaminase activity [GO:0008483]
A0A0D6Q4B9	990000	1100000		Komagataeibacter europaeus NBRC 3261	4558594344	1556420233	2	3	2	257	2762	588	311	7694277048		ATP synthase F1 mitochondrial assembly chaperone ATP12	proton-transporting ATP synthase complex assembly [GO:0043461]
A0A0D6Q0K7	660000	2000000	270000	Komagataeibacter europaeus NBRC 3261	6953460799	1030042918	3	3	3	466	50347	771	259	6662434578	gorA	Dihydrolipoamide dehydrogenase/glutathione reductase	flavin adenine dinucleotide binding [GO:0050660]; oxidoreductase activity, acting on a sulfur group of donors, NAD(P) as acceptor [GO:0016668]; cell redox homeostasis [GO:0045454]
A0A0D6PXE8	3000000		1400000	Komagataeibacter europaeus NBRC 3261	6027941642	1343873518	2	2	2	253	26641	594	311	5469652891	hisF	Imidazole glycerol phosphate synthase subunit HisF (EC 4.3.2.10) (IGP synthase cyclase subunit) (IGP synthase subunit HisF) (ImGP synthase subunit HisF) (IGPS subunit HisF)	cytoplasm [GO:0005737]; imidazoleglycerol-phosphate synthase activity [GO:0000107]; lyase activity [GO:0016829]; histidine biosynthetic process [GO:0000105]
A0A0D6PYV9		9300000	6400000	Komagataeibacter europaeus NBRC 3261	6444923093	196347032	2	5	2	219	23678	607	52	242717433		Metallo-beta-lactamase
A0A0D6Q248	930000	990000		Komagataeibacter europaeus NBRC 3261	1270892075	664893617	3	15	1	752	83207	54	252	4670652103		Diguanylate cyclase/phosphodiesterase	regulation of transcription, DNA-templated [GO:0006355]
A0A0N0MEZ2	11000000		24000000	Komagataeibacter intermedius AF2	1267520034	3736979167	23	117	1	768	83931	679	4212	3435817623		Formate dehydrogenase alpha subunit	4 iron, 4 sulfur cluster binding [GO:0051539]; formate dehydrogenase (NAD+) activity [GO:0008863]; molybdenum ion binding [GO:0030151]; molybdopterin cofactor binding [GO:0043546]
A0A0N1FCE7	13000000		8000000	Komagataeibacter intermedius AF2	5667916718	4326710817	11	39	1	453	48911	648	1477	1522662679	trpB	Tryptophan synthase beta chain (EC 4.2.1.20)	tryptophan synthase activity [GO:0004834]
A0A0N0MEN5		540000	1100000	Komagataeibacter intermedius AF2	2231214612	6415343915	6	16	1	1512	162746	539	153	5492956758	smc	Chromosome partition protein Smc	cytoplasm [GO:0005737]; ATP binding [GO:0005524]; DNA binding [GO:0003677]; chromosome condensation [GO:0030261]; DNA replication [GO:0006260]; sister chromatid cohesion [GO:0007062]
A0A0N1FLS5		4100000	2000000	Komagataeibacter intermedius AF2	705040089	1185031185	3	5	3	481	51643	805	225	1424777699	ftsA	Cell division protein FtsA	cell division site [GO:0032153]; cytoplasmic side of plasma membrane [GO:0009898]; FtsZ-dependent cytokinesis [GO:0043093]
A0A2S3W4Q6	3700000	20000000		Komagataeibacter maltaceti	1448199321	1170018282	4	11	1	547	59142	531	468	3021126103		Ribonuclease J 1 (EC 3.1.-.-)	exonuclease activity [GO:0004527]; RNA binding [GO:0003723]
G2I096	26000000		78000000	Komagataeibacter medellinensis (strain NBRC 3288 / BCRC 11682 / LMG 1693 / Kondo 51) (Gluconacetobacter medellinensis)	1950277834	4366666667	30	172	1	900	97058	803	5462	5588125952	infB	Translation initiation factor IF-2	cytoplasm [GO:0005737]; GTP binding [GO:0005525]; GTPase activity [GO:0003924]; translation initiation factor activity [GO:0003743]
G2I1Z5	500000	1200000		Komagataeibacter medellinensis (strain NBRC 3288 / BCRC 11682 / LMG 1693 / Kondo 51) (Gluconacetobacter medellinensis)	9645319444	4096989967	17	72	1	598	65761	582	4135	2350187389	aspS	Aspartate--tRNA(Asp/Asn) ligase (EC 6.1.1.23) (Aspartyl-tRNA synthetase) (AspRS) (Non-discriminating aspartyl-tRNA synthetase) (ND-AspRS)	cytoplasm [GO:0005737]; aspartate-tRNA ligase activity [GO:0004815]; aspartate-tRNA(Asn) ligase activity [GO:0050560]; ATP binding [GO:0005524]; nucleic acid binding [GO:0003676]; aspartyl-tRNA aminoacylation [GO:0006422]
G2I500	640000	1600000		Komagataeibacter medellinensis (strain NBRC 3288 / BCRC 11682 / LMG 1693 / Kondo 51) (Gluconacetobacter medellinensis)	201964782	1004366812	4	24	1	458	49724	66	638	7742958784		Aldehyde dehydrogenase	oxidoreductase activity, acting on the aldehyde or oxo group of donors, NAD or NADP as acceptor [GO:0016620]
G2I5G2		4500000	6100000	Komagataeibacter medellinensis (strain NBRC 3288 / BCRC 11682 / LMG 1693 / Kondo 51) (Gluconacetobacter medellinensis)	2815609377	1580246914	6	23	2	405	43519	515	995	6859384656		Aminotransferase (EC 2.6.1.-)	pyridoxal phosphate binding [GO:0030170]; transaminase activity [GO:0008483]; biosynthetic process [GO:0009058]
A0A318RA55	5400000	7200000	10000000	Komagataeibacter oboediens	1926040687	1706730769	4	9	1	416	44864	611	638	2791893435		Cysteine desulfurase (EC 2.8.1.7)	cysteine desulfurase activity [GO:0031071]; pyridoxal phosphate binding [GO:0030170]; cysteine metabolic process [GO:0006534]
A0A318QBU4		9000000	11000000	Komagataeibacter pomaceti	2807456203	3700787402	47	228	1	1397	155207	769	4555	736332231	rpoC	DNA-directed RNA polymerase subunit beta' (RNAP subunit beta') (EC 2.7.7.6) (RNA polymerase subunit beta') (Transcriptase subunit beta')	DNA binding [GO:0003677]; DNA-directed 5'-3' RNA polymerase activity [GO:0003899]; magnesium ion binding [GO:0000287]; zinc ion binding [GO:0008270]; transcription, DNA-templated [GO:0006351]
A0A070A9R6		16000000	12000000	Komagataeibacter rhaeticus AF1	1277460849	3165098375	27	94	2	1169	128441	525	1929	2925406599		Methionine synthase (EC 2.1.1.13) (5-methyltetrahydrofolate--homocysteine methyltransferase)	cobalamin binding [GO:0031419]; methionine synthase activity [GO:0008705]; zinc ion binding [GO:0008270]; methylation [GO:0032259]; pteridine-containing compound metabolic process [GO:0042558]
A0A070AB84		2300000	2800000	Komagataeibacter rhaeticus AF1	3709686691	2220496894	9	32	1	644	735	611	778	9191641784	thrS	Threonine--tRNA ligase (EC 6.1.1.3) (Threonyl-tRNA synthetase) (ThrRS)	cytoplasm [GO:0005737]; ATP binding [GO:0005524]; metal ion binding [GO:0046872]; threonine-tRNA ligase activity [GO:0004829]; tRNA binding [GO:0000049]; threonyl-tRNA aminoacylation [GO:0006435]
A0A070A533	1100000		2100000	Komagataeibacter rhaeticus AF1	3754530764	8762886598	2	2	2	388	42479	668	202	471617794		Nicotinate phosphoribosyltransferase	nicotinate-nucleotide diphosphorylase (carboxylating) activity [GO:0004514]; NAD biosynthetic process [GO:0009435]
A0A371YX69	65000000	120000000		Komagataeibacter sp. AV 382	2567800943	5086614173	41	373	1	635	67586	5	25218	1242473729	dnaK	Chaperone protein DnaK (HSP70) (Heat shock 70 kDa protein) (Heat shock protein 70)	ATP binding [GO:0005524]; unfolded protein binding [GO:0051082]; protein folding [GO:0006457]
A0A371YYB3	2900000	3700000		Komagataeibacter sp. AV 382	1267612917	1824324324	4	9	2	296	33555	53	624	1953663921	glyQ	Glycine--tRNA ligase alpha subunit (EC 6.1.1.14) (Glycyl-tRNA synthetase alpha subunit) (GlyRS)	cytoplasm [GO:0005737]; ATP binding [GO:0005524]; glycine-tRNA ligase activity [GO:0004820]; glycyl-tRNA aminoacylation [GO:0006426]
A0A318QKX5	14000000	140000000	150000000	Komagataeibacter sucrofermentans	2819228945	572555205	50	413	1	634	67253	503	41453	1319232336	dnaK	Chaperone protein DnaK (HSP70) (Heat shock 70 kDa protein) (Heat shock protein 70)	ATP binding [GO:0005524]; unfolded protein binding [GO:0051082]; protein folding [GO:0006457]
A0A318R1H5		5900000	970000	Komagataeibacter sucrofermentans	4802570367	3685344828	11	33	2	464	49067	944	1512	111611685	ffh	Signal recognition particle protein (Fifty-four homolog)	plasma membrane [GO:0005886]; signal recognition particle [GO:0048500]; 7S RNA binding [GO:0008312]; GTP binding [GO:0005525]; GTPase activity [GO:0003924]; SRP-dependent cotranslational protein targeting to membrane [GO:0006614]
A0A2V4RDK5		1100000	2800000	Komagataeibacter swingsii	7430348067	780141844	2	4	2	282	30039	9	359	1167882419		Uncharacterized protein	unfolded protein binding [GO:0051082]
A0A318PSB2	95000000	310000	100000000	Komagataeibacter xylinus (Gluconacetobacter xylinus)	2182973997	545323741	32	186	2	695	765	536	21675	5049010546	fusA	Elongation factor G (EF-G)	cytoplasm [GO:0005737]; GTP binding [GO:0005525]; GTPase activity [GO:0003924]; translation elongation factor activity [GO:0003746]
A0A318Q112	2300000	3600000		Komagataeibacter xylinus (Gluconacetobacter xylinus)	5641160288	2304409673	9	45	1	703	76136	654	1113	1423782859	tkt	Transketolase	metal ion binding [GO:0046872]; transketolase activity [GO:0004802]
A0A318PY71		10000000	12000000	Komagataeibacter xylinus (Gluconacetobacter xylinus)	2019081998	2911051213	6	14	2	371	39783	63	931	4614735341		S-(hydroxymethyl)glutathione dehydrogenase (EC 1.1.1.284)	S-(hydroxymethyl)glutathione dehydrogenase activity [GO:0051903]; zinc ion binding [GO:0008270]; ethanol oxidation [GO:0006069]
W5Y5U4		1700000	1200000	Komagataeibacter xylinus E25	1089931574	1314878893	3	13	1	289	32184	661	624	3445911348		Aldose 1-epimerase	carbohydrate binding [GO:0030246]; isomerase activity [GO:0016853]; carbohydrate metabolic process [GO:0005975]
W5Y5N9		950000	2600000	Komagataeibacter xylinus E25	1125104875	1464285714	2	5	2	280	29769	944	311	1931043649		RNA methyltransferase, TrmH family, group 3	RNA binding [GO:0003723]; RNA methyltransferase activity [GO:0008173]; RNA processing [GO:0006396]
A0A0D6Q5A7		9800000	10000000	Komagataeibacter xylinus NBRC 13693	1666588793	393081761	14	427	1	318	34668	545	60585	1531563196		Lipase/esterase/arylesterase	hydrolase activity [GO:0016787]
A0A0D6Q4J6		10000000	31000000	Komagataeibacter xylinus NBRC 13693	2054321251	1861702128	5	14	1	564	60347	581	638	4360031486		Pyruvate decarboxylase	carboxy-lyase activity [GO:0016831]; magnesium ion binding [GO:0000287]; thiamine pyrophosphate binding [GO:0030976]
A0A0D6Q8B8	4500000		4200000	Komagataeibacter xylinus NBRC 13693	1251795222	56	3	15	1	750	82959	53	239	3717281437		Diguanylate cyclase/phosphodiesterase	regulation of transcription, DNA-templated [GO:0006355]
A0A0D6Q8C7	3100000	3700000	6100000	Komagataeibacter xylinus NBRC 13693	1915917237	2263513514	4	13	2	296	33489	521	995	3523395824	glyQ	Glycine--tRNA ligase alpha subunit (EC 6.1.1.14) (Glycyl-tRNA synthetase alpha subunit) (GlyRS)	cytoplasm [GO:0005737]; ATP binding [GO:0005524]; glycine-tRNA ligase activity [GO:0004820]; glycyl-tRNA aminoacylation [GO:0006426]
D5RJD3		1300000	4100000	Roseomonas cervicalis ATCC 49957	4097641034	9836065574	8	50	1	854	93393	572	487	1565258853	clpB	Chaperone protein ClpB	cytoplasm [GO:0005737]; ATP binding [GO:0005524]; ATPase activity [GO:0016887]; protein refolding [GO:0042026]; response to heat [GO:0009408]
A0A1V2H2A4	330000		4400000	Roseomonas deserti	3408733819	1232449298	8	31	1	641	67838	51	708	9083731973	dnaK	Chaperone protein DnaK (HSP70) (Heat shock 70 kDa protein) (Heat shock protein 70)	ATP binding [GO:0005524]; unfolded protein binding [GO:0051082]; protein folding [GO:0006457]
A0A1M6ARD5		4500000	3300000	Roseomonas rosea	2100667068	6346483705	5	11	1	1166	128237	558	191	3259196162		Methionine synthase (EC 2.1.1.13) (5-methyltetrahydrofolate--homocysteine methyltransferase)	cobalamin binding [GO:0031419]; methionine synthase activity [GO:0008705]; zinc ion binding [GO:0008270]; methylation [GO:0032259]; pteridine-containing compound metabolic process [GO:0042558]

## Sheet: FW_UL
File S3. List of exclusive proteins identified in the LC/MS-MS analysis in fine wine and beer vinegar profiles. The exclusive proteins were obtained by the difference between those in at least 50% out of total samples in at least one sampling time and those in each sampling time (EL, end of loading; UL, just before unloading). Several parameters of each protein are included as accession number (U…
Accession (Uniprot)	UL_1	UL_2	UL_3	Organism	Sum PEP Score	Coverage	# Peptides	# PSMs	# Unique Peptides	# AAs	MW [kDa]	calc. pI	emPAI	Score	Gene names	Protein names	Gene Ontology
A0A0D6MXL9		13000000	110000	Acetobacter aceti NBRC 14818	8469587814	88125	11	103	2	160	1773	677	99	3430525622		Uncharacterized protein
A0A0D6MY56	1200000	5700000	3000000	Acetobacter aceti NBRC 14818	1054503261	1330049261	2	6	2	203	22703	668	874	1642445052		NAD(P)H dehydrogenase (Quinone)
A0A1D8QY15	1700000		1400000	Acetobacter ascendens	1212993398	3359621451	21	154	2	634	67468	501	478	4646540835	dnaK	Chaperone protein DnaK (HSP70) (Heat shock 70 kDa protein) (Heat shock protein 70)	ATP binding [GO:0005524]; unfolded protein binding [GO:0051082]; protein folding [GO:0006457]
A0A1D8QVX2	2400000	3600000	190000	Acetobacter ascendens	2573608496	1238738739	5	30	3	444	4935	481	812	9984075558	tig	Trigger factor (TF) (EC 5.2.1.8) (PPIase)	cytoplasm [GO:0005737]; peptidyl-prolyl cis-trans isomerase activity [GO:0003755]; cell cycle [GO:0007049]; cell division [GO:0051301]; protein folding [GO:0006457]; protein transport [GO:0015031]
A0A1D8QU89	2300000	460000		Acetobacter ascendens	6893473438	2532467532	3	5	3	154	16991	727	1371	1308105683	rpsF	30S ribosomal protein S6	ribosome [GO:0005840]; rRNA binding [GO:0019843]; structural constituent of ribosome [GO:0003735]; translation [GO:0006412]
W8GMH2	110000000	170000000		Acetobacter estunensis	7704120781	4105960265	13	115	1	302	32301	539	33145	3108606936	groEL	60 kDa chaperonin (Fragment)	ATP binding [GO:0005524]; protein refolding [GO:0042026]
A0A087PMA7		3200000	2500000	Acetobacter malorum	1998578252	7493540052	6	52	1	774	83703	81	42	1528670415		Isoquinoline 1-oxidoreductase beta subunit (EC 1.3.99.16)	isoquinoline 1-oxidoreductase activity [GO:0047121]
A0A252BYN9	3100000	2300000	490000	Acetobacter okinawensis	1777049229	3035971223	21	181	2	695	76525	555	9	5197356888	fusA	Elongation factor G (EF-G)	cytoplasm [GO:0005737]; GTP binding [GO:0005525]; GTPase activity [GO:0003924]; translation elongation factor activity [GO:0003746]
A0A0D6NN19	170000	5200000	1800000	Acetobacter orientalis 21F-2	9381174068	1782890007	22	78	3	1391	154373	727	878	2456932977	rpoC	DNA-directed RNA polymerase subunit beta' (RNAP subunit beta') (EC 2.7.7.6) (RNA polymerase subunit beta') (Transcriptase subunit beta')	DNA binding [GO:0003677]; DNA-directed 5'-3' RNA polymerase activity [GO:0003899]; magnesium ion binding [GO:0000287]; zinc ion binding [GO:0008270]; transcription, DNA-templated [GO:0006351]
A0A368AEQ2	3300000		760000	Acetobacter pasteurianus (Acetobacter turbidans)	1067745076	4040816327	11	118	2	490	52431	489	4298	4261594374	atpD	ATP synthase subunit beta (EC 7.1.2.2) (ATP synthase F1 sector subunit beta) (F-ATPase subunit beta)	plasma membrane [GO:0005886]; proton-transporting ATP synthase complex, catalytic core F(1) [GO:0045261]; ATP binding [GO:0005524]; proton-transporting ATP synthase activity, rotational mechanism [GO:0046933]; proton-transporting ATPase activity, rotational mechanism [GO:0046961]
C7JFQ3	1500000	22000000	180000	Acetobacter pasteurianus (strain NBRC 3283 / LMG 1513 / CCTM 1153)	2179312808	3135289907	41	199	2	1397	154627	539	3642	6269677745	rpoB	DNA-directed RNA polymerase subunit beta (RNAP subunit beta) (EC 2.7.7.6) (RNA polymerase subunit beta) (Transcriptase subunit beta)	DNA binding [GO:0003677]; DNA-directed 5'-3' RNA polymerase activity [GO:0003899]; ribonucleoside binding [GO:0032549]; transcription, DNA-templated [GO:0006351]
A0A401X1B3	2800000	6200000	1700000	Acetobacter pasteurianus NBRC 3278	2473864954	192	6	22	3	375	39771	79	3217	5912913799	ompA	Outer membrane protein OmpA	membrane [GO:0016020]
W8GVK0	1600000	2200000	650000	Acetobacter persici	5687232896	4409722222	9	56	1	288	31053	549	10788	137471993	groEL	60 kDa chaperonin (Fragment)	ATP binding [GO:0005524]; protein refolding [GO:0042026]
A0A252AM83	1300000	5300000		Acetobacter persici	1258363581	1768707483	5	13	1	441	47393	654	743	364378916	trpB	Tryptophan synthase beta chain (EC 4.2.1.20)	tryptophan synthase activity [GO:0004834]
A0A2G4RAA1	4900000	3500000	970000	Acetobacter pomorum	6654382648	3258426966	2	7	1	89	10019	999	2162	1950497341	rpsQ	30S ribosomal protein S17	ribosome [GO:0005840]; rRNA binding [GO:0019843]; structural constituent of ribosome [GO:0003735]; translation [GO:0006412]
F1YTQ9	9600000	11000000	4700000	Acetobacter pomorum DM001	191410225	2631578947	7	30	1	133	1495	1043	6743	8964542913	rplS	50S ribosomal protein L19	ribosome [GO:0005840]; structural constituent of ribosome [GO:0003735]; translation [GO:0006412]
F1YUT4	5900000	2000000		Acetobacter pomorum DM001	263376087	2422680412	5	33	1	194	2149	605	3642	7360768056	ahpC	Thioredoxin domain-containing protein	antioxidant activity [GO:0016209]; oxidoreductase activity [GO:0016491]
F1YT66	4600000	580000	4200000	Acetobacter pomorum DM001	1055361617	2552083333	3	8	3	192	21068	488	131	2315747714	secB1	Protein-export protein SecB	cytoplasm [GO:0005737]; unfolded protein binding [GO:0051082]; protein folding [GO:0006457]; protein tetramerization [GO:0051262]; protein transport [GO:0015031]
A0A252BXT3	6700000		1300000	Acetobacter sp. DsW_063	4763379281	1866913124	10	123	2	541	57389	498	1448	3481975118	groEL	60 kDa chaperonin (GroEL protein) (Protein Cpn60)	cytoplasm [GO:0005737]; ATP binding [GO:0005524]; unfolded protein binding [GO:0051082]; protein refolding [GO:0042026]
A0A252C6N9	9100000	660000		Acetobacter sp. DsW_063	1233721518	626566416	2	17	1	399	43451	654	413	5204808879		Dihydropteridine reductase	FAD binding [GO:0071949]; heme binding [GO:0020037]; nitric oxide dioxygenase activity [GO:0008941]; oxygen binding [GO:0019825]; oxygen carrier activity [GO:0005344]; response to nitrosative stress [GO:0051409]; response to toxic substance [GO:0009636]
A0A5C1YKH5		160000000	48000000	Acetobacter sp. KACC 21233	1852329711	3895899054	30	245	1	634	67103	502	9564	7426457373	dnaK	Chaperone protein DnaK (HSP70) (Heat shock 70 kDa protein) (Heat shock protein 70)	ATP binding [GO:0005524]; unfolded protein binding [GO:0051082]; protein folding [GO:0006457]
A0A5C1YM21		15000000	11000000	Acetobacter sp. KACC 21233	3827451809	1197846568	10	69	1	743	81314	67	1015	1455308269		PQQ-dependent dehydrogenase, methanol/ethanol family (EC 1.1.2.-)	membrane [GO:0016020]; outer membrane-bounded periplasmic space [GO:0030288]; calcium ion binding [GO:0005509]; electron transfer activity [GO:0009055]; heme binding [GO:0020037]; oxidoreductase activity, acting on CH-OH group of donors [GO:0016614]
A0A0P0HYC5	6900000	4700000	4200000	Acetobacter sp. LMG 1506	2542921611	1725352113	3	30	1	284	30369	547	1154	1081076841	groEL	60 kDa chaperonin (Fragment)	ATP binding [GO:0005524]; protein refolding [GO:0042026]
A0A094YJW4	15000000	24000000		Acetobacter tropicalis	2179082757	3255813953	6	17	1	172	19255	696	2981	4617727399	ndk	Nucleoside diphosphate kinase (NDK) (NDP kinase) (EC 2.7.4.6) (Nucleoside-2-P kinase)	cytoplasm [GO:0005737]; ATP binding [GO:0005524]; metal ion binding [GO:0046872]; nucleoside diphosphate kinase activity [GO:0004550]; CTP biosynthetic process [GO:0006241]; GTP biosynthetic process [GO:0006183]; UTP biosynthetic process [GO:0006228]
A0A4P7WB79	4600000	9700000		Acetobacteraceae bacterium	2316866292	2182741117	5	23	2	197	21903	939	2162	7803875446		CarD family transcriptional regulator
A0A4P7WC29		31000000	15000000	Acetobacteraceae bacterium	3576172725	5458089669	2	9	1	513	57808	474	179	1664801145	nusA	Transcription termination/antitermination protein NusA	cytoplasm [GO:0005737]; DNA-binding transcription factor activity [GO:0003700]; nucleotide binding [GO:0000166]; RNA binding [GO:0003723]; DNA-templated transcription, termination [GO:0006353]; transcription antitermination [GO:0031564]
A0A257UXB5	850000	870000		Acidiphilium sp. 37-64-53	7336495692	24	13	198	2	550	58384	557	2932	6681849784	groL	60 kDa chaperonin (GroEL protein) (Protein Cpn60)	cytoplasm [GO:0005737]; ATP binding [GO:0005524]; unfolded protein binding [GO:0051082]; protein refolding [GO:0042026]
A0A257QM31	6800000	8000000	3200000	Acidocella sp. 20-58-15	6851208924	7095343681	2	8	1	451	4942	535	166	2123175621		HslU--HslV peptidase ATPase subunit	HslUV protease complex [GO:0009376]; ATP binding [GO:0005524]; ATPase activity [GO:0016887]; peptidase activity [GO:0008233]
A0A257PA90	10000000	16000000		Acidocella sp. 20-61-6	5534774842	1571428571	3	6	2	140	15054	587	931	1638338113	ndk	Nucleoside diphosphate kinase (NDK) (NDP kinase) (EC 2.7.4.6) (Nucleoside-2-P kinase)	cytoplasm [GO:0005737]; ATP binding [GO:0005524]; metal ion binding [GO:0046872]; nucleoside diphosphate kinase activity [GO:0004550]; CTP biosynthetic process [GO:0006241]; GTP biosynthetic process [GO:0006183]; UTP biosynthetic process [GO:0006228]
A9HLA7	4300000	2000000	790000	Gluconacetobacter diazotrophicus (strain ATCC 49037 / DSM 5601 / PAl5)	5428174751	2812939522	2	5	1	711	78848	774	116	128941381	cysS	Cysteine--tRNA ligase (EC 6.1.1.16) (Cysteinyl-tRNA synthetase) (CysRS)	cytoplasm [GO:0005737]; ATP binding [GO:0005524]; cysteine-tRNA ligase activity [GO:0004817]; RNA binding [GO:0003723]; RNA methyltransferase activity [GO:0008173]; zinc ion binding [GO:0008270]; cysteinyl-tRNA aminoacylation [GO:0006423]; RNA processing [GO:0006396]
A0A318PS69	6600000	13000000	4000000	Gluconacetobacter entanii	2295186473	3532608696	4	16	1	184	20509	59	131	588641634	dcd	dCTP deaminase (EC 3.5.4.13) (Deoxycytidine triphosphate deaminase)	dCTP deaminase activity [GO:0008829]; nucleotide binding [GO:0000166]; dUMP biosynthetic process [GO:0006226]; dUTP biosynthetic process [GO:0006229]
A0A370G4F4	5500000	16000000	5700000	Gluconacetobacter liquefaciens (Acetobacter liquefaciens)	6266442203	1388888889	2	9	2	144	15302	994	425	2089859056	rplK	50S ribosomal protein L11	ribosome [GO:0005840]; large ribosomal subunit rRNA binding [GO:0070180]; structural constituent of ribosome [GO:0003735]; translation [GO:0006412]
A0A149RZ17	4800000	2700000	970000	Gluconobacter oxydans (Gluconobacter suboxydans)	4756279083	1081081081	2	4	2	259	28211	986	292	1065903091		HTH luxR-type domain-containing protein	integral component of membrane [GO:0016021]; DNA binding [GO:0003677]; regulation of transcription, DNA-templated [GO:0006355]
A0A067Z0V9	1200000		530000	Gluconobacter oxydans DSM 3504	2906841775	4488888889	10	34	1	225	25113	1061	3084	9741215944	rpsC	30S ribosomal protein S3	ribosome [GO:0005840]; mRNA binding [GO:0003729]; rRNA binding [GO:0019843]; structural constituent of ribosome [GO:0003735]; translation [GO:0006412]
A0A4Y3QCL4	4000000		1800000	Gluconobacter sphaericus NBRC 12467	6701819007	1404494382	2	5	2	178	19843	515	668	1553837824		Polyketide cyclase
A0A4P5NQG9	13000000	24000000		Komagataeibacter diospyri	5433190267	3789868668	14	44	1	533	58973	762	2562	1333063097		Flavin-containing amine oxidase	oxidoreductase activity [GO:0016491]
A0A4P5NW31	13000000	16000000	5300000	Komagataeibacter diospyri	2465247756	2047619048	6	25	2	210	22173	681	1929	8584851265	iojap	Ribosomal silencing factor RsfS	cytoplasm [GO:0005737]; mature ribosome assembly [GO:0042256]; negative regulation of ribosome biogenesis [GO:0090071]; negative regulation of translation [GO:0017148]
A0A0M0EKY6	890000	1900000		Komagataeibacter europaeus (Gluconacetobacter europaeus)	3464245923	4548494983	7	21	1	299	32632	936	1783	7530343354	parB1	Putative chromosome-partitioning protein ParB	DNA binding [GO:0003677]
A0A0M0EJS7	4500000	2700000		Komagataeibacter europaeus (Gluconacetobacter europaeus)	2436436507	21484375	3	15	2	256	27465	696	1894	5875725722	exbB2	Biopolymer transport protein ExbB	integral component of membrane [GO:0016021]; plasma membrane [GO:0005886]; protein transport [GO:0015031]
A0A0M0EJM8	2000000	4300000	1500000	Komagataeibacter europaeus (Gluconacetobacter europaeus)	3397247625	1630695444	8	17	8	834	91363	733	585	5449178815		TonB-dependent receptor plug domain protein	cell outer membrane [GO:0009279]
A0A0M0ELX9	14000000	24000000	4200000	Komagataeibacter europaeus (Gluconacetobacter europaeus)	175079675	2284263959	4	13	4	197	21309	709	4179	4809056258	cobP	Bifunctional adenosylcobalamin biosynthesis protein (EC 2.7.1.156) (EC 2.7.7.62)	adenosylcobinamide kinase activity [GO:0043752]; ATP binding [GO:0005524]; cobinamide phosphate guanylyltransferase activity [GO:0008820]; GTP binding [GO:0005525]; cobalamin biosynthetic process [GO:0009236]
A0A0M0EE50	3200000	3600000	1200000	Komagataeibacter europaeus (Gluconacetobacter europaeus)	1737192727	1101573677	6	15	4	699	78049	87	379	4402952921	cirA5	Colicin I receptor	cell outer membrane [GO:0009279]
A0A0M0EI53	15000000	7500000	2800000	Komagataeibacter europaeus (Gluconacetobacter europaeus)	2130488889	4272727273	5	12	5	220	23506	816	1894	4046087813		Toluene tolerance, Ttg2
A0A0M0EM31	1600000	3400000	1000000	Komagataeibacter europaeus (Gluconacetobacter europaeus)	1832336953	1529636711	5	13	5	523	57088	635	585	402507484	oprM2	Outer membrane protein OprM	integral component of membrane [GO:0016021]; plasma membrane [GO:0005886]; efflux transmembrane transporter activity [GO:0015562]
A0A0M0EGP9	2000000	4000000	910000	Komagataeibacter europaeus (Gluconacetobacter europaeus)	1020305485	1270491803	3	12	3	244	25882	526	2162	3586503601	minC	Probable septum site-determining protein MinC	cell morphogenesis [GO:0000902]; division septum assembly [GO:0000917]; regulation of cell septum assembly [GO:1901891]
A0A0M0EDM0		6400000	1600000	Komagataeibacter europaeus (Gluconacetobacter europaeus)	144205032	1428571429	3	9	3	448	48593	635	73	2844317174		Uncharacterized protein
A0A0M0ELP2	5200000	2500000	4000000	Komagataeibacter europaeus (Gluconacetobacter europaeus)	1421185937	2977099237	2	7	2	131	13074	506	2162	2725174856		Uncharacterized protein
A0A0M0ELS1	4300000	2900000	610000	Komagataeibacter europaeus (Gluconacetobacter europaeus)	1337373156	1585760518	4	10	4	309	35476	936	995	2415774143		Polyphosphate kinase 2 (PPK2)	polyphosphate kinase activity [GO:0008976]; polyphosphate metabolic process [GO:0006797]
A0A0M0EIU4	66000000	100000000	58000000	Komagataeibacter europaeus (Gluconacetobacter europaeus)	1421131904	3875968992	3	9	3	129	14462	654	2594	2405761695		Uncharacterized protein
A0A0M0EII3	2400000	2100000	1500000	Komagataeibacter europaeus (Gluconacetobacter europaeus)	7221831378	914893617	2	6	2	470	50964	615	194	2330682826	ccp	Cytochrome c551 peroxidase (EC 1.11.1.5)	cytochrome-c peroxidase activity [GO:0004130]; electron transfer activity [GO:0009055]; heme binding [GO:0020037]; metal ion binding [GO:0046872]
A0A0M0EGA6	7700000	5900000	1500000	Komagataeibacter europaeus (Gluconacetobacter europaeus)	1214505253	2846153846	3	8	3	130	14345	526	3642	2138034153		Virulence protein
A0A0M0ELK2	4800000	6300000	2400000	Komagataeibacter europaeus (Gluconacetobacter europaeus)	8676146245	2727272727	3	7	3	132	13615	544	1683	2137500358	cdd	Cytidine deaminase (EC 3.5.4.5) (Cytidine aminohydrolase)	cytidine deaminase activity [GO:0004126]; zinc ion binding [GO:0008270]
A0A0M0EGA5	7800000	5100000	3600000	Komagataeibacter europaeus (Gluconacetobacter europaeus)	1294677036	7534246575	3	8	3	438	46973	796	1031	2122221327	csbX2	Alpha-ketoglutarate permease	integral component of membrane [GO:0016021]; transmembrane transporter activity [GO:0022857]
A0A0M0EKA6	1900000	2200000	400000	Komagataeibacter europaeus (Gluconacetobacter europaeus)	1748496431	2559726962	4	7	4	293	3276	81	73	1874555612	crtB2	All-trans-phytoene synthase (EC 2.5.1.99)	farnesyl-diphosphate farnesyltransferase activity [GO:0004310]; geranylgeranyl-diphosphate geranylgeranyltransferase activity [GO:0016767]; squalene synthase activity [GO:0051996]; carotenoid biosynthetic process [GO:0016117]
A0A0M0EL33	1100000	200000	1300000	Komagataeibacter europaeus (Gluconacetobacter europaeus)	117779978	7547169811	3	6	3	795	85869	623	205	1763278317	gcd	Quinoprotein glucose dehydrogenase (EC 1.1.5.2)	integral component of membrane [GO:0016021]; outer membrane-bounded periplasmic space [GO:0030288]; plasma membrane [GO:0005886]; quinone binding [GO:0048038]; quinoprotein glucose dehydrogenase activity [GO:0008876]
A0A0M0EGA9	11000000	14000000		Komagataeibacter europaeus (Gluconacetobacter europaeus)	1240337284	1853658537	3	5	3	205	2206	866	778	1545844769	mlaC	Putative phospholipid-binding protein MlaC
A0A0M0EFR8	23000000	11000000	5300000	Komagataeibacter europaeus (Gluconacetobacter europaeus)	5121935488	3736263736	2	5	2	91	10166	655	931	1537993407	minE	Cell division topological specificity factor	cell cycle [GO:0007049]; cell division [GO:0051301]; regulation of division septum assembly [GO:0032955]
A0A0M0ELF7	810000	1900000	1100000	Komagataeibacter europaeus (Gluconacetobacter europaeus)	5292097843	1428571429	2	5	2	196	21253	55	931	1504313302		Polysaccharide biosynthesis/export protein	membrane [GO:0016020]; polysaccharide transmembrane transporter activity [GO:0015159]
A0A0M0EFU3	740000	1200000	58000	Komagataeibacter europaeus (Gluconacetobacter europaeus)	6934931133	8048780488	3	5	3	410	43325	84	369	1240371549		Ferredoxin--NADP reductase (EC 1.18.1.2)	ferredoxin-NADP+ reductase activity [GO:0004324]
A0A0M0EHI2	1900000	830000		Komagataeibacter europaeus (Gluconacetobacter europaeus)	8564188749	2897196262	2	5	2	107	11769	594	778	1128582454	ihfA	Integration host factor subunit alpha (IHF-alpha)	DNA binding [GO:0003677]; DNA recombination [GO:0006310]; regulation of transcription, DNA-templated [GO:0006355]; regulation of translation [GO:0006417]
A0A0M0EEW5	6000000	6500000	690000	Komagataeibacter europaeus (Gluconacetobacter europaeus)	9918907726	2874251497	2	5	2	167	18261	709	585	1122539949		Uncharacterized protein
A0A0M0EGN1	1900000	1500000	560000	Komagataeibacter europaeus (Gluconacetobacter europaeus)	5264161985	7738095238	2	4	2	336	34947	621	259	1109251308	pstS2	Phosphate-binding protein PstS	ATP-binding cassette (ABC) transporter complex [GO:0043190]; phosphate ion binding [GO:0042301]; phosphate ion transmembrane transport [GO:0035435]
A0A0M0EH06	1200000	1300000		Komagataeibacter europaeus (Gluconacetobacter europaeus)	686035134	7788161994	2	4	2	321	34806	988	259	1104830122	pyrB	Aspartate carbamoyltransferase (EC 2.1.3.2) (Aspartate transcarbamylase) (ATCase)	amino acid binding [GO:0016597]; aspartate carbamoyltransferase activity [GO:0004070]; 'de novo' pyrimidine nucleobase biosynthetic process [GO:0006207]; 'de novo' UMP biosynthetic process [GO:0044205]; cellular amino acid metabolic process [GO:0006520]
A0A0M0EET3		720000	1100000	Komagataeibacter europaeus (Gluconacetobacter europaeus)	6755347296	2480916031	3	4	3	262	28555	522	54	1063032413	ramA	(R)-stereoselective amidase (EC 3.5.1.100)	hydrolase activity [GO:0016787]; nitrogen compound metabolic process [GO:0006807]
A0A068Q7M0	4300000	7600000	1100000	Komagataeibacter europaeus (Gluconacetobacter europaeus)	6296923672	1041666667	2	4	2	192	212	972	311	1051981854	Gelrp	AsnC/Lrp family transcriptional regulator	sequence-specific DNA binding [GO:0043565]
A0A0M0EGQ2	1900000		1700000	Komagataeibacter europaeus (Gluconacetobacter europaeus)	6035096903	1304347826	2	3	2	368	38923	9	259	9773556948		Lytic murein transglycosylase	peptidoglycan binding [GO:0042834]
A0A0M0EM26		1100000	630000	Komagataeibacter europaeus (Gluconacetobacter europaeus)	5104835566	1008645533	2	3	2	347	36742	633	245	9465591908	ssuA1	Putative aliphatic sulfonates-binding protein
A0A0M0EHZ3	1100000	1000000		Komagataeibacter europaeus (Gluconacetobacter europaeus)	8047121094	3760282021	2	3	2	851	93021	976	93	9147184849	ybiO2	Moderate conductance mechanosensitive channel YbiO	integral component of membrane [GO:0016021]; transmembrane transport [GO:0055085]
A0A0M0EEF4		1700000	1200000	Komagataeibacter europaeus (Gluconacetobacter europaeus)	5028028492	8902691511	2	3	2	483	49783	674	259	8262079		Uncharacterized protein
A0A0D6PYL2	11000000	54000000	11000000	Komagataeibacter europaeus NBRC 3261	7663104156	371541502	7	69	4	253	27096	913	27943	1939984595		Uncharacterized protein
A0A0D6PYV8	11000000	5200000	5400000	Komagataeibacter europaeus NBRC 3261	673711717	3594009983	13	47	1	601	64992	555	2257	1323255409	argS	Arginine--tRNA ligase (EC 6.1.1.19) (Arginyl-tRNA synthetase) (ArgRS)	cytoplasm [GO:0005737]; arginine-tRNA ligase activity [GO:0004814]; ATP binding [GO:0005524]; arginyl-tRNA aminoacylation [GO:0006420]
A0A0D6Q1V4	6500000	5100000	4500000	Komagataeibacter europaeus NBRC 3261	2937606626	2397408207	6	21	6	463	49567	686	817	741263032		Secretion system type I outer membrane efflux pump lipoprotein NodT	efflux transmembrane transporter activity [GO:0015562]
A0A0D6PWA1	22000000	36000000	4300000	Komagataeibacter europaeus NBRC 3261	3034729815	6336633663	6	19	6	101	11029	68	12335	5498552358		Uncharacterized protein
A0A0D6Q0F7	5500000	11000000	230000	Komagataeibacter europaeus NBRC 3261	2296377115	7980769231	5	11	5	104	1124	47	14849	339945116		Ferredoxin 2Fe-2S	2 iron, 2 sulfur cluster binding [GO:0051537]; electron transfer activity [GO:0009055]
A0A0D6Q1T7		40000000	20000000	Komagataeibacter europaeus NBRC 3261	1713946548	1272727273	2	7	2	275	27663	652	874	3231675816	thiM	Hydroxyethylthiazole kinase (EC 2.7.1.50) (4-methyl-5-beta-hydroxyethylthiazole kinase) (TH kinase) (Thz kinase)	ATP binding [GO:0005524]; hydroxyethylthiazole kinase activity [GO:0004417]; magnesium ion binding [GO:0000287]; thiamine biosynthetic process [GO:0009228]; thiamine diphosphate biosynthetic process [GO:0009229]
A0A0D6Q242	3000000	3700000	1300000	Komagataeibacter europaeus NBRC 3261	1418461377	2108843537	4	9	4	294	33698	706	833	2734853292	bamD	Outer membrane protein assembly factor BamD	cell outer membrane [GO:0009279]; Gram-negative-bacterium-type cell outer membrane assembly [GO:0043165]; protein insertion into membrane [GO:0051205]
A0A0D6PZL9	15000000	8600000		Komagataeibacter europaeus NBRC 3261	1573566592	5175438596	4	10	4	114	12561	1095	14849	2726887178	rpsP	30S ribosomal protein S16	ribosome [GO:0005840]; structural constituent of ribosome [GO:0003735]; translation [GO:0006412]
A0A0D6PZ85	8700000	7900000	2000000	Komagataeibacter europaeus NBRC 3261	9140052218	3971631206	4	10	4	141	15625	1045	1154	2518044758	rplQ	50S ribosomal protein L17	ribosome [GO:0005840]; structural constituent of ribosome [GO:0003735]; translation [GO:0006412]
A0A0D6Q2D5	4100000	6000000	1300000	Komagataeibacter europaeus NBRC 3261	1702491413	2315789474	3	8	3	285	30441	54	1031	2511154342		Uncharacterized protein
A0A0D6PXL2	3300000	4000000	1300000	Komagataeibacter europaeus NBRC 3261	113258231	33	4	10	4	200	21574	679	2594	2195544434		Uncharacterized protein
A0A0D6Q4Y4	1700000	3000000	540000	Komagataeibacter europaeus NBRC 3261	8158200201	8281573499	2	7	2	483	52817	684	166	2187554741	ntrC	DNA-binding transcriptional regulator NtrC (Nitrogen regulation protein NR(I))	cytoplasm [GO:0005737]; ATP binding [GO:0005524]; phosphorelay response regulator activity [GO:0000156]; sequence-specific DNA binding [GO:0043565]; transcription factor binding [GO:0008134]; nitrogen fixation [GO:0009399]; regulation of nitrogen utilization [GO:0006808]; regulation of transcription, DNA-templated [GO:0006355]
A0A0D6PZM1	1700000	2900000	1100000	Komagataeibacter europaeus NBRC 3261	1017545832	1907894737	2	6	2	152	16156	502	2981	2134073257		Cupin_5 domain-containing protein
A0A0D6Q2D1	13000000	10000000	3200000	Komagataeibacter europaeus NBRC 3261	1268457862	2255639098	3	9	3	133	14252	491	531	1977467561		DNA-binding helix-turn-helix protein CopG	DNA binding [GO:0003677]
A0A0D6PUT4	400000	990000	260000	Komagataeibacter europaeus NBRC 3261	1217930495	1103327496	3	6	3	571	63233	857	212	1943592787		Secretion system type I outer membrane RND efflux pump lipoprotein NodT	integral component of membrane [GO:0016021]; plasma membrane [GO:0005886]; efflux transmembrane transporter activity [GO:0015562]
A0A0D6Q2D6		1300000	1000000	Komagataeibacter europaeus NBRC 3261	9917211868	1125541126	3	6	3	462	50106	802	269	193878181		Recombination factor protein RarA/AAA ATPase	ATP binding [GO:0005524]; ATPase activity [GO:0016887]; DNA binding [GO:0003677]; DNA replication [GO:0006260]
A0A0D6PZU6	2100000	3900000	3200000	Komagataeibacter europaeus NBRC 3261	7508913528	1641137856	3	7	3	457	48787	676	413	192919488	bamB	Dehydrogenase with coenzyme pyrrolo-quinoline quinone (PQQ)	oxidoreductase activity [GO:0016491]
A0A0D6PV17	2800000	2100000	140000	Komagataeibacter europaeus NBRC 3261	8646122759	2268041237	3	7	3	194	20447	553	778	1892502511		2-amino-4-hydroxy-6-hydroxymethyldihydropteridine pyrophosphokinase	2-amino-4-hydroxy-6-hydroxymethyldihydropteridine diphosphokinase activity [GO:0003848]; ATP binding [GO:0005524]; kinase activity [GO:0016301]; folic acid biosynthetic process [GO:0046656]; tetrahydrofolate biosynthetic process [GO:0046654]
A0A0D6PVP0	1100000	760000	410000	Komagataeibacter europaeus NBRC 3261	990055169	1013513514	3	5	3	592	66007	884	304	1839236116		ABC transporter	integral component of membrane [GO:0016021]; ATP binding [GO:0005524]; ATPase activity [GO:0016887]; ATPase-coupled transmembrane transporter activity [GO:0042626]
A0A0D6PYK9	12000000	19000000	1500000	Komagataeibacter europaeus NBRC 3261	104708829	3557692308	2	5	2	104	11523	702	931	1772302675		Stress response and cell division protein BolA	cell division [GO:0051301]
A0A0D6PVJ7	840000	870000	730000	Komagataeibacter europaeus NBRC 3261	1174005687	1057692308	3	7	3	416	43541	667	551	1764184713		Alcohol dehydrogenase cytochrome c	plasma membrane [GO:0005886]; respirasome [GO:0070469]; electron transfer activity [GO:0009055]; heme binding [GO:0020037]; iron ion binding [GO:0005506]; oxidoreductase activity, acting on CH-OH group of donors [GO:0016614]
A0A0D6Q252	5100000	3800000	960000	Komagataeibacter europaeus NBRC 3261	8154386076	204379562	2	6	2	137	15231	652	668	1753126955		4-oxalocrotonate tautomerase
A0A0D6Q1R7		14000000	5400000	Komagataeibacter europaeus NBRC 3261	9347009902	1036585366	2	5	2	492	5391	693	233	1727766037		Porin	cell outer membrane [GO:0009279]; pore complex [GO:0046930]; porin activity [GO:0015288]; carbohydrate transport [GO:0008643]; ion transport [GO:0006811]
A0A0D6PXP1	1900000	3800000	1400000	Komagataeibacter europaeus NBRC 3261	8404084463	2239583333	3	7	3	192	21203	791	874	1706119251		Uncharacterized protein
A0A0D6Q1S1	1700000	2200000	810000	Komagataeibacter europaeus NBRC 3261	8276965231	3165467626	3	7	3	139	15813	619	1683	1683982158		Uncharacterized protein
A0A0D6Q3N8	4100000	4700000	3400000	Komagataeibacter europaeus NBRC 3261	9187663689	2087542088	3	7	3	297	32435	674	54	1573796654		DUF2272 domain-containing protein
A0A0D6Q1W0	2900000	3600000	3700000	Komagataeibacter europaeus NBRC 3261	1169557821	2197802198	4	5	4	273	29512	6	54	1570535254		Lipoprotein	membrane [GO:0016020]
A0A0D6PWA2	16000000	4300000	7700000	Komagataeibacter europaeus NBRC 3261	7300215849	1987179487	2	5	2	156	16476	755	585	1485410476		Aldehyde dehydrogenase small subunit	2 iron, 2 sulfur cluster binding [GO:0051537]; electron transfer activity [GO:0009055]; metal ion binding [GO:0046872]
A0A0D6PW40	1300000	8300000		Komagataeibacter europaeus NBRC 3261	1031637976	1627906977	2	6	2	129	14249	527	3642	1457429385		Lactoylglutathione lyase (EC 4.4.1.5) (Glyoxalase I)	lactoylglutathione lyase activity [GO:0004462]; metal ion binding [GO:0046872]
A0A0D6Q3Y1	2500000	1100000	490000	Komagataeibacter europaeus NBRC 3261	9111941088	203539823	2	7	2	113	12614	578	1371	1348364151		Cell division protein ZapA
A0A0D6PY44	350000	9500000		Komagataeibacter europaeus NBRC 3261	1209954741	1621621622	3	4	3	259	2881	692	468	131870296	pstB	Phosphate import ATP-binding protein PstB (EC 7.3.2.1) (ABC phosphate transporter) (Phosphate-transporting ATPase)	plasma membrane [GO:0005886]; ATP binding [GO:0005524]; ATPase activity [GO:0016887]; ATPase-coupled phosphate ion transmembrane transporter activity [GO:0015415]; inorganic phosphate transmembrane transporter activity [GO:0005315]
A0A0D6Q127	12000000	1900000		Komagataeibacter europaeus NBRC 3261	5055273846	1575757576	2	4	2	165	17502	986	52	1172160292		Uncharacterized protein
A0A0D6Q1Z5	9900000	9500000		Komagataeibacter europaeus NBRC 3261	4867070489	9243697479	2	4	2	357	38752	613	274	1085099149		ABC transporter ferrichrome transport
A0A0D6PY09	1900000	1100000		Komagataeibacter europaeus NBRC 3261	7130386211	3211009174	2	3	2	109	1197	885	931	1008955026		Uncharacterized protein
A0A0D6PXU1		9200000	590000	Komagataeibacter europaeus NBRC 3261	5789828678	1461187215	2	4	2	219	24079	671	359	9908002853	upp	Uracil phosphoribosyltransferase (EC 2.4.2.9) (UMP pyrophosphorylase) (UPRTase)	GTP binding [GO:0005525]; magnesium ion binding [GO:0000287]; uracil phosphoribosyltransferase activity [GO:0004845]; nucleoside metabolic process [GO:0009116]; UMP salvage [GO:0044206]; uracil salvage [GO:0006223]
A0A0D6PY37	870000	1100000	100000	Komagataeibacter europaeus NBRC 3261	4608228006	1157894737	2	4	2	190	21184	939	52	9498701572	pth	Peptidyl-tRNA hydrolase (PTH) (EC 3.1.1.29)	cytoplasm [GO:0005737]; aminoacyl-tRNA hydrolase activity [GO:0004045]; translation [GO:0006412]
A0A0D6PVM7	6900000		2600000	Komagataeibacter europaeus NBRC 3261	7964027702	3176470588	2	4	2	85	9265	977	3642	766644454		Uncharacterized protein	integral component of membrane [GO:0016021]
A0A0D6Q059	6000000		1100000	Komagataeibacter europaeus NBRC 3261	1127512315	1158536585	2	4	2	328	3514	61	389	6537094831		Uncharacterized protein	integral component of membrane [GO:0016021]
A0A0D6PZX5	710000	3700000		Komagataeibacter europaeus NBRC 3261	3668207442	1768292683	2	2	2	164	17781	668	778	6109014273		Peptidyl-prolyl cis-trans isomerase (EC 5.2.1.8)	peptidyl-prolyl cis-trans isomerase activity [GO:0003755]
A0A0N1N5X2	2200000	2900000	540000	Komagataeibacter intermedius AF2	1150900326	1556603774	2	9	2	212	23536	64	995	2760503745		Heat shock protein Hsp20
A0A0N0MDD6	3700000	1200000	960000	Komagataeibacter intermedius AF2	8420665902	7692307692	2	4	2	416	44181	616	334	1349279094		ABC transporter permease	ATP-binding cassette (ABC) transporter complex [GO:0043190]
G2I6V4	3200000	1800000		Komagataeibacter medellinensis (strain NBRC 3288 / BCRC 11682 / LMG 1693 / Kondo 51) (Gluconacetobacter medellinensis)	755916488	2638888889	2	5	2	144	16595	519	1154	1168618011	dksA	RNA polymerase-binding transcription factor DksA	cytoplasm [GO:0005737]; zinc ion binding [GO:0008270]; regulation of gene expression [GO:0010468]
A0A1U9RJ39	4200000	4400000	1700000	Komagataeibacter nataicola	2043337921	446969697	6	25	2	132	14583	1036	4995	7229962873	rpsH	30S ribosomal protein S8	ribosome [GO:0005840]; rRNA binding [GO:0019843]; structural constituent of ribosome [GO:0003735]; translation [GO:0006412]
A0A1U9RMF8		32000000	3700000	Komagataeibacter nataicola	2319231302	4213483146	5	22	1	178	19018	573	1894	7058611727		Single-stranded DNA-binding protein (SSB)	single-stranded DNA binding [GO:0003697]; DNA recombination [GO:0006310]; DNA repair [GO:0006281]; DNA replication [GO:0006260]
A0A1U9RLY3	12000000		11000000	Komagataeibacter nataicola	6025064812	1207729469	2	3	2	207	2233	932	389	8279670715		Peroxiredoxin	antioxidant activity [GO:0016209]; oxidoreductase activity [GO:0016491]
A0A318QYW8	2800000	6700000		Komagataeibacter oboediens	7544734327	1483870968	2	6	2	155	16982	456	1371	1820175791		TIGR02300 family protein
A0A181C8A2	800000	4700000		Komagataeibacter rhaeticus	6793414468	9885931559	2	5	2	263	28573	616	585	1413566589	lptB	Lipopolysaccharide export system ATP-binding protein LptB (EC 3.6.3.-)	ATP-binding cassette (ABC) transporter complex [GO:0043190]; cytoplasm [GO:0005737]; ATP binding [GO:0005524]; ATPase activity [GO:0016887]; transmembrane transport [GO:0055085]
A0A070A4M7		6900000	3100000	Komagataeibacter rhaeticus AF1	1147408373	3233695652	13	120	1	368	39104	652	24809	3966677444		Membrane protein	membrane [GO:0016020]
A0A070A509	3100000	970000	590000	Komagataeibacter rhaeticus AF1	9498080336	1220556745	3	7	3	467	5131	9	389	1804416108		GntR family transcriptional regulator	catalytic activity [GO:0003824]; DNA-binding transcription factor activity [GO:0003700]; pyridoxal phosphate binding [GO:0030170]; biosynthetic process [GO:0009058]
A0A070AAE7		4900000	3500000	Komagataeibacter rhaeticus AF1	9140816996	2142857143	2	6	2	140	15257	557	585	1745167422	vapC	Ribonuclease VapC (RNase VapC) (EC 3.1.-.-) (Toxin VapC)	magnesium ion binding [GO:0000287]; ribonuclease activity [GO:0004540]; toxin activity [GO:0090729]
A0A347W8N7		88000000	26000000	Komagataeibacter saccharivorans	23259312	548037889	42	426	2	739	80855	615	2901	1188866926	adhA	Alcohol dehydrogenase [cytochrome c] (EC 1.1.2.8)	membrane [GO:0016020]; outer membrane-bounded periplasmic space [GO:0030288]; calcium ion binding [GO:0005509]; electron transfer activity [GO:0009055]; ethanol:cytochrome c oxidoreductase activity [GO:0052935]; heme binding [GO:0020037]
A0A371YY09		180000000	76000000	Komagataeibacter sp. AV 382	3778168713	1860465116	6	47	1	473	5032	646	1219	1702151165		Alcohol dehydrogenase	plasma membrane [GO:0005886]; electron transfer activity [GO:0009055]; heme binding [GO:0020037]; iron ion binding [GO:0005506]; oxidoreductase activity, acting on CH-OH group of donors [GO:0016614]
A0A371Z3L0	5300000	7800000	3800000	Komagataeibacter sp. AV 382	1330915704	304964539	4	10	4	141	15218	5	2162	3147445059	vapC	Ribonuclease VapC (RNase VapC) (EC 3.1.-.-) (Toxin VapC)	magnesium ion binding [GO:0000287]; ribonuclease activity [GO:0004540]; toxin activity [GO:0090729]
A0A371YWQ4	5000000	9300000		Komagataeibacter sp. AV 382	4550722209	1939393939	2	3	2	165	18369	1024	334	1112609291	smpB	SsrA-binding protein (Small protein B)	cytoplasm [GO:0005737]; RNA binding [GO:0003723]; trans-translation [GO:0070929]
A0A2V4R325	170000000	64000000	91000000	Komagataeibacter swingsii	332831147	4214559387	8	37	2	261	27942	903	11328	7770806599		OmpW family protein	outer membrane [GO:0019867]
A0A2V4R2S8	2900000	15000000	1200000	Komagataeibacter swingsii	2041768529	2467532468	6	15	3	385	40891	55	738	3975492191	dxr	1-deoxy-D-xylulose 5-phosphate reductoisomerase (DXP reductoisomerase) (EC 1.1.1.267) (1-deoxyxylulose-5-phosphate reductoisomerase) (2-C-methyl-D-erythritol 4-phosphate synthase)	1-deoxy-D-xylulose-5-phosphate reductoisomerase activity [GO:0030604]; isomerase activity [GO:0016853]; metal ion binding [GO:0046872]; NADPH binding [GO:0070402]; isopentenyl diphosphate biosynthetic process, methylerythritol 4-phosphate pathway [GO:0019288]; terpenoid biosynthetic process [GO:0016114]
A0A2V4SB46	10000000	9300000	1800000	Komagataeibacter swingsii	7307294051	1761363636	2	4	2	176	19019	633	585	1379410481		Uncharacterized protein
A0A2V4RHT6	520000	390000		Komagataeibacter swingsii	1280446525	2528735632	2	4	2	87	918	714	2981	1241116309		Uncharacterized protein
A0A2D3HHA8	3100000	2300000	2000000	Komagataeibacter xylinus (Gluconacetobacter xylinus)	8279043071	4015957447	13	61	1	376	41415	489	4754	2149086301	prfB	Peptide chain release factor 2 (RF-2)	cytoplasm [GO:0005737]; translation release factor activity, codon specific [GO:0016149]
A0A318PF22	2100000	1100000		Komagataeibacter xylinus (Gluconacetobacter xylinus)	6192592708	2426035503	2	3	2	169	17836	529	931	3305452347		Uncharacterized protein
A0A0D6Q8K0	2400000	1500000	2500000	Komagataeibacter xylinus NBRC 13693	7167358878	765171504	2	7	2	379	4107	533	259	2420348096		Capsule polysaccharide export protein	membrane [GO:0016020]; polysaccharide transmembrane transporter activity [GO:0015159]
A0A418WF58	26000000	38000000	18000000	Oleomonas sp. K1W22B-8	5903896717	1685393258	2	4	2	89	9285	1054	1154	1128283429	rpmA	50S ribosomal protein L27	ribosome [GO:0005840]; structural constituent of ribosome [GO:0003735]; translation [GO:0006412]
A0A3A9JW70	5400000		1500000	Roseomonas sp. Z24	3570512495	1731669267	8	32	1	641	68333	515	802	9828121102	dnaK	Chaperone protein DnaK (HSP70) (Heat shock 70 kDa protein) (Heat shock protein 70)	ATP binding [GO:0005524]; unfolded protein binding [GO:0051082]; protein folding [GO:0006457]
A0A6B0VY59	8900000	26000000	810000	Saccharibacter sp. EH60	4629618681	2157480315	9	63	2	635	68085	497	1006	2121212255		Molecular chaperone DnaK
A0A4Y6UH85	5400000	11000000	4300000	Swingsia samuiensis	8065038615	112195122	2	6	1	205	21376	758	359	2010338664		Cold-shock protein	cytoplasm [GO:0005737]; nucleic acid binding [GO:0003676]
A0A317EEP9	150000000	160000000		Zavarzinia sp. HR-AS	1107693295	1794871795	14	156	2	546	57763	574	4796	4591628793	groL	60 kDa chaperonin (GroEL protein) (Protein Cpn60)	cytoplasm [GO:0005737]; ATP binding [GO:0005524]; unfolded protein binding [GO:0051082]; protein refolding [GO:0042026]

## Sheet: B_EL
File S3. List of exclusive proteins identified in the LC/MS-MS analysis in fine wine and beer vinegar profiles. The exclusive proteins were obtained by the difference between those in at least 50% out of total samples in at least one sampling time and those in each sampling time (EL, end of loading; UL, just before unloading). Several parameters of each protein are included as accession number (U…
Accession (Uniprot)	EL_1	EL_2	EL_3	EL_4	Organism	Sum PEP Score	Coverage	# Peptides	# PSMs	# Unique Peptides	# AAs	MW [kDa]	calc. pI	emPAI	Score	Gene names	Protein names	Gene Ontology
A0A0D6MS47		61000000		70000000	Acetobacter aceti NBRC 14818	2354824197	4150943396	29	372	2	636	67294	501	12789	1094855078	dnaK	Chaperone protein DnaK (HSP70) (Heat shock 70 kDa protein) (Heat shock protein 70)	ATP binding [GO:0005524]; unfolded protein binding [GO:0051082]; protein folding [GO:0006457]
A0A1D8QZY0	14000000	10000000	2800000	57000000	Acetobacter ascendens	1417790599	1700680272	4	14	3	294	33253	506	1054	3660251904	glyQ	Glycine--tRNA ligase alpha subunit (EC 6.1.1.14) (Glycyl-tRNA synthetase alpha subunit) (GlyRS)	cytoplasm [GO:0005737]; ATP binding [GO:0005524]; glycine-tRNA ligase activity [GO:0004820]; glycyl-tRNA aminoacylation [GO:0006426]
A0A252AY90			190000000	12000000	Acetobacter indonesiensis	6563348677	3243243243	10	72	2	481	53203	552	1913	1904944216	glnA	Glutamine synthetase (EC 6.3.1.2)	cytoplasm [GO:0005737]; ATP binding [GO:0005524]; glutamate-ammonia ligase activity [GO:0004356]; glutamine biosynthetic process [GO:0006542]; nitrogen fixation [GO:0009399]
A0A252AXT1	40000000	50000000	27000000	13000000	Acetobacter indonesiensis	1789972675	699844479	4	19	2	643	73333	609	299	6688719416	thrS	Threonine--tRNA ligase (EC 6.1.1.3) (Threonyl-tRNA synthetase) (ThrRS)	cytoplasm [GO:0005737]; ATP binding [GO:0005524]; metal ion binding [GO:0046872]; threonine-tRNA ligase activity [GO:0004829]; tRNA binding [GO:0000049]; threonyl-tRNA aminoacylation [GO:0006435]
A0A087PTX4		110000000	76000000	130000000	Acetobacter malorum	3316445297	152173913	7	48	1	598	66008	545	833	9783827519	aspS	Aspartate--tRNA(Asp/Asn) ligase (EC 6.1.1.23) (Aspartyl-tRNA synthetase) (AspRS) (Non-discriminating aspartyl-tRNA synthetase) (ND-AspRS)	cytoplasm [GO:0005737]; aspartate-tRNA ligase activity [GO:0004815]; aspartate-tRNA(Asn) ligase activity [GO:0050560]; ATP binding [GO:0005524]; nucleic acid binding [GO:0003676]; aspartyl-tRNA aminoacylation [GO:0006422]
A0A087PKX2	2400000		5400000		Acetobacter malorum	5186516155	4672897196	2	9	1	428	46771	739	15	2395248008		NADH dehydrogenase (EC 1.6.99.3)	NADH dehydrogenase activity [GO:0003954]
A0A4Y3TMP8	1700000			4200000	Acetobacter orleanensis	646971288	3425076453	6	91	1	327	35966	604	3833	2153234868		Aliphatic nitrilase	hydrolase activity, acting on carbon-nitrogen (but not peptide) bonds [GO:0016810]; nitrogen compound metabolic process [GO:0006807]
A0A346DS22		1200000	940000	2200000	Acetobacter pomorum	5591749008	6878306878	2	7	2	378	4287	648	186	1963552928		DUF4172 domain-containing protein
A0A0U5ER02		33000000	20000000		Acetobacter senegalensis	7325198239	4693611473	3	10	1	767	84797	644	145	2397475231	fdhF	Formate dehydrogenase, alpha subunit (EC 1.2.1.2)	4 iron, 4 sulfur cluster binding [GO:0051539]; formate dehydrogenase (NAD+) activity [GO:0008863]; molybdenum ion binding [GO:0030151]; molybdopterin cofactor binding [GO:0043546]
A0A0U5BEW5	1700000	3400000			Acetobacter senegalensis	3851593501	3436807095	2	2	2	902	101964	703	89	5699971437		Putative DNA methylase	DNA binding [GO:0003677]; N-methyltransferase activity [GO:0008170]; DNA methylation [GO:0006306]; DNA restriction-modification system [GO:0009307]
A0A1Y3FZZ4	1900000		5400000		Acetobacter sp. DmW_043	5328432648	1725888325	2	6	1	197	21117	634	1154	1058031535	hslV	ATP-dependent protease subunit HslV (EC 3.4.25.2)	HslUV protease complex [GO:0009376]; proteasome core complex [GO:0005839]; metal ion binding [GO:0046872]; threonine-type endopeptidase activity [GO:0004298]; proteolysis involved in cellular protein catabolic process [GO:0051603]
A0A4P7WCK1	1900000			340000	Acetobacteraceae bacterium	8391211927	1155433287	15	99	1	1454	161166	592	643	2831832702	rpoC	DNA-directed RNA polymerase subunit beta' (RNAP subunit beta') (EC 2.7.7.6) (RNA polymerase subunit beta') (Transcriptase subunit beta')	DNA binding [GO:0003677]; DNA-directed 5'-3' RNA polymerase activity [GO:0003899]; magnesium ion binding [GO:0000287]; zinc ion binding [GO:0008270]; transcription, DNA-templated [GO:0006351]
A0A4Q4CGL4	900000		15000000		Acetobacteraceae bacterium	3082063614	7244094488	6	69	2	635	68659	494	496	1647437283	dnaK	Chaperone protein DnaK (HSP70) (Heat shock 70 kDa protein) (Heat shock protein 70)	ATP binding [GO:0005524]; unfolded protein binding [GO:0051082]; protein folding [GO:0006457]
A0A354UZ00	790000			9000000	Acetobacteraceae bacterium	5942213778	1285714286	2	13	1	280	29764	596	292	3418201232	groEL	60 kDa chaperonin (Fragment)	ATP binding [GO:0005524]; protein refolding [GO:0042026]
A0A257UXB5		890000		1100000	Acidiphilium sp. 37-64-53	7944016449	2054545455	11	255	1	550	58384	557	2472	8637394334	groL	60 kDa chaperonin (GroEL protein) (Protein Cpn60)	cytoplasm [GO:0005737]; ATP binding [GO:0005524]; unfolded protein binding [GO:0051082]; protein refolding [GO:0042026]
A0A257V1R9	2000000	1700000			Acidiphilium sp. 37-64-53	6271065139	2722513089	2	8	1	955	107316	582	87	2435356617	ileS	Isoleucine--tRNA ligase (EC 6.1.1.5) (Isoleucyl-tRNA synthetase) (IleRS)	cytoplasm [GO:0005737]; aminoacyl-tRNA editing activity [GO:0002161]; ATP binding [GO:0005524]; isoleucine-tRNA ligase activity [GO:0004822]; tRNA binding [GO:0000049]; zinc ion binding [GO:0008270]; isoleucyl-tRNA aminoacylation [GO:0006428]
A0A0D6P6M4	750000	3200000	3100000		Acidisphaera rubrifaciens HS-AP3	9374844216	7007575758	3	19	1	528	57204	577	225	5335767412	leuA	2-isopropylmalate synthase (EC 2.3.3.13) (Alpha-IPM synthase) (Alpha-isopropylmalate synthase)	2-isopropylmalate synthase activity [GO:0003852]; leucine biosynthetic process [GO:0009098]
A0A0D6PEX3		120000000	77000000		Acidocella aminolytica 101 = DSM 11237	1543423155	1963406052	24	200	1	1421	157692	552	1407	6163942909	rpoB	DNA-directed RNA polymerase subunit beta (RNAP subunit beta) (EC 2.7.7.6) (RNA polymerase subunit beta) (Transcriptase subunit beta)	DNA binding [GO:0003677]; DNA-directed 5'-3' RNA polymerase activity [GO:0003899]; ribonucleoside binding [GO:0032549]; transcription, DNA-templated [GO:0006351]
A0A257QJN0		1800000		18000000	Acidocella sp. 20-58-15	2872982777	1669565217	8	42	1	575	62519	525	701	1178092525		30S ribosomal protein S1	ribosome [GO:0005840]; RNA binding [GO:0003723]; structural constituent of ribosome [GO:0003735]; translation [GO:0006412]
A0A257QM31	13000000	17000000	19000000	3800000	Acidocella sp. 20-58-15	1331490726	7095343681	2	15	1	451	4942	535	259	3968718457		HslU--HslV peptidase ATPase subunit	HslUV protease complex [GO:0009376]; ATP binding [GO:0005524]; ATPase activity [GO:0016887]; peptidase activity [GO:0008233]
A0A318MV49			1000000	820000	Commensalibacter sp. ESL0284	7037307338	6951871658	2	9	1	374	40358	703	245	2295451379	ispG	4-hydroxy-3-methylbut-2-en-1-yl diphosphate synthase (flavodoxin) (EC 1.17.7.3) (1-hydroxy-2-methyl-2-(E)-butenyl 4-diphosphate synthase)	4 iron, 4 sulfur cluster binding [GO:0051539]; 4-hydroxy-3-methylbut-2-en-1-yl diphosphate synthase activity [GO:0046429]; iron ion binding [GO:0005506]; isopentenyl diphosphate biosynthetic process, methylerythritol 4-phosphate pathway [GO:0019288]; terpenoid biosynthetic process [GO:0016114]
A0A318MYB2		7000000	5300000	63000	Commensalibacter sp. ESL0284	3905644186	5472636816	2	6	1	402	44571	654	202	8243727565		O-succinylhomoserine sulfhydrylase	catalytic activity [GO:0003824]; pyridoxal phosphate binding [GO:0030170]; transsulfuration [GO:0019346]
A9HAU1	2700000	3800000			Gluconacetobacter diazotrophicus (strain ATCC 49037 / DSM 5601 / PAl5)	2320798639	1317073171	6	26	1	410	42067	521	823	9318027663	argJ	Arginine biosynthesis bifunctional protein ArgJ [Cleaved into: Arginine biosynthesis bifunctional protein ArgJ alpha chain;Arginine biosynthesis bifunctional protein ArgJ beta chain] [Includes: Glutamate N-acetyltransferase (EC 2.3.1.35) (Ornithine acetyltransferase) (OATase) (Ornithine transacetylase);Amino-acid acetyltransferase (EC 2.3.1.1) (N-acetylglutamate synthase) (AGSase)]	cytoplasm [GO:0005737]; acetyl-CoA:L-glutamate N-acetyltransferase activity [GO:0004042]; glutamate N-acetyltransferase activity [GO:0004358]; methione N-acyltransferase activity [GO:0103045]; arginine biosynthetic process [GO:0006526]
A9HK29		1100000		3600000	Gluconacetobacter diazotrophicus (strain ATCC 49037 / DSM 5601 / PAl5)	1601305573	1018518519	5	32	1	540	58867	567	54	6878145909	lysS	Lysine--tRNA ligase (EC 6.1.1.6) (Lysyl-tRNA synthetase) (LysRS)	cytoplasm [GO:0005737]; ATP binding [GO:0005524]; lysine-tRNA ligase activity [GO:0004824]; tRNA binding [GO:0000049]; lysyl-tRNA aminoacylation [GO:0006430]
A0A1B6VH41	240000		4500000		Gluconobacter cerinus	3953852538	1114058355	9	78	1	754	82343	684	901	2172406613		Alcohol dehydrogenase	membrane [GO:0016020]; outer membrane-bounded periplasmic space [GO:0030288]; calcium ion binding [GO:0005509]; electron transfer activity [GO:0009055]; heme binding [GO:0020037]; oxidoreductase activity, acting on CH-OH group of donors [GO:0016614]
A0A511BA70	1200000	18000000			Gluconobacter kanchanaburiensis NBRC 103587	7993340002	9274193548	2	8	1	496	5247	667	179	2313829112	guaB	Inosine-5'-monophosphate dehydrogenase (IMP dehydrogenase) (IMPD) (IMPDH) (EC 1.1.1.205)	IMP dehydrogenase activity [GO:0003938]; metal ion binding [GO:0046872]; nucleotide binding [GO:0000166]; GMP biosynthetic process [GO:0006177]
A0A1L3R9H8			44000000	39000000	Granulibacter bethesdensis	1707461464	2617159337	29	171	1	1387	15431	775	164	5256368196	rpoC	DNA-directed RNA polymerase subunit beta' (RNAP subunit beta') (EC 2.7.7.6) (RNA polymerase subunit beta') (Transcriptase subunit beta')	DNA binding [GO:0003677]; DNA-directed 5'-3' RNA polymerase activity [GO:0003899]; magnesium ion binding [GO:0000287]; zinc ion binding [GO:0008270]; transcription, DNA-templated [GO:0006351]
A0A365YQ72	1000000			1200000	Komagataeibacter cocois	4370726216	9352517986	2	3	2	278	30572	647	334	6623040318		Alpha/beta hydrolase	hydrolase activity [GO:0016787]
A0A4P5P519	15000000			11000000	Komagataeibacter diospyri	2164047158	7139240506	23	262	2	395	42536	536	66002	8449603798	metK	S-adenosylmethionine synthase (AdoMet synthase) (EC 2.5.1.6) (MAT) (Methionine adenosyltransferase)	cytoplasm [GO:0005737]; ATP binding [GO:0005524]; magnesium ion binding [GO:0000287]; methionine adenosyltransferase activity [GO:0004478]; one-carbon metabolic process [GO:0006730]; S-adenosylmethionine biosynthetic process [GO:0006556]
A0A4P5NWQ1	5200000		1100000	1500000	Komagataeibacter diospyri	1623096558	4903846154	20	198	2	520	57414	846	9	6948113232	glpD	Glycerol-3-phosphate dehydrogenase (EC 1.1.5.3)	glycerol-3-phosphate dehydrogenase complex [GO:0009331]; sn-glycerol-3-phosphate:ubiquinone-8 oxidoreductase activity [GO:0052591]; glycerol-3-phosphate metabolic process [GO:0006072]
A0A4P5NRU9		82000000	90000000		Komagataeibacter diospyri	1337764549	476	19	152	1	500	53717	692	11589	4885750048	guaB	Inosine-5'-monophosphate dehydrogenase (IMP dehydrogenase) (IMPD) (IMPDH) (EC 1.1.1.205)	IMP dehydrogenase activity [GO:0003938]; metal ion binding [GO:0046872]; nucleotide binding [GO:0000166]; GMP biosynthetic process [GO:0006177]
A0A4P5NYK2		2600000	8700000		Komagataeibacter diospyri	1019805334	5159090909	19	103	1	440	49406	628	14505	3113099504	proS	Proline--tRNA ligase (EC 6.1.1.15) (Prolyl-tRNA synthetase) (ProRS)	cytoplasm [GO:0005737]; ATP binding [GO:0005524]; proline-tRNA ligase activity [GO:0004827]; prolyl-tRNA aminoacylation [GO:0006433]
A0A4V0WME5	1900000			2800000	Komagataeibacter diospyri	8999794082	3444444444	12	82	1	450	46622	693	352	2613521546	aroA	3-phosphoshikimate 1-carboxyvinyltransferase (EC 2.5.1.19) (5-enolpyruvylshikimate-3-phosphate synthase) (EPSP synthase) (EPSPS)	cytoplasm [GO:0005737]; 3-phosphoshikimate 1-carboxyvinyltransferase activity [GO:0003866]; aromatic amino acid family biosynthetic process [GO:0009073]; chorismate biosynthetic process [GO:0009423]
A0A4P5NRG4		5700000	16000000		Komagataeibacter diospyri	5527219945	4019138756	10	37	1	418	45909	885	2631	1192070444	dadA	D-amino acid dehydrogenase (EC 1.4.99.-)	D-amino-acid dehydrogenase activity [GO:0008718]; D-amino acid catabolic process [GO:0019478]
A0A0M0EEE4	6900000	24000000		25000000	Komagataeibacter europaeus (Gluconacetobacter europaeus)	8798208021	4432989691	12	93	1	291	32029	632	7859	3203844419	rhdA	Thiosulfate sulfurtransferase (EC 2.8.1.1)	thiosulfate sulfurtransferase activity [GO:0004792]
A0A0M0EFU0		10000000	9400000	19000000	Komagataeibacter europaeus (Gluconacetobacter europaeus)	4506456726	308681672	5	43	1	311	32682	668	1637	152869529	argC	N-acetyl-gamma-glutamyl-phosphate reductase (AGPR) (EC 1.2.1.38) (N-acetyl-glutamate semialdehyde dehydrogenase) (NAGSA dehydrogenase)	cytoplasm [GO:0005737]; N-acetyl-gamma-glutamyl-phosphate reductase activity [GO:0003942]; NAD binding [GO:0051287]; arginine biosynthetic process [GO:0006526]
A0A0M0EJZ5		560000	560000	980000	Komagataeibacter europaeus (Gluconacetobacter europaeus)	3503140627	2883211679	5	44	1	274	29018	533	1512	1506830311	parA	Chromosome partitioning protein ParA
A0A0M0EM10	4100000	6100000	8700000		Komagataeibacter europaeus (Gluconacetobacter europaeus)	442756467	3755656109	7	48	2	442	47763	652	1721	1497871345	nicB	Nicotinate dehydrogenase subunit B (EC 1.17.2.1)	integral component of membrane [GO:0016021]; plasma membrane [GO:0005886]; electron transfer activity [GO:0009055]; heme binding [GO:0020037]; iron ion binding [GO:0005506]; oxidoreductase activity, acting on CH-OH group of donors [GO:0016614]
A0A0M0EFW5	1100000	4200000	1200000	1800000	Komagataeibacter europaeus (Gluconacetobacter europaeus)	2636090539	7373965388	6	14	6	1329	142971	695	197	4688433552	acsC2	Cellulose synthase operon protein C	cell outer membrane [GO:0009279]; cellulose biosynthetic process [GO:0030244]; UDP-glucose metabolic process [GO:0006011]
A0A0M0EK57		15000000	14000000	9900000	Komagataeibacter europaeus (Gluconacetobacter europaeus)	1970614426	486381323	5	14	3	257	25902	633	4623	4244993663		Uncharacterized protein
A0A0M0EEC0	1900000	3200000	7000000	2600000	Komagataeibacter europaeus (Gluconacetobacter europaeus)	1740641448	1623529412	3	11	3	425	45252	862	334	3890913963	dacC	D-alanyl-D-alanine carboxypeptidase DacC (EC 3.4.16.4)	serine-type D-Ala-D-Ala carboxypeptidase activity [GO:0009002]; cell wall organization [GO:0071555]; peptidoglycan biosynthetic process [GO:0009252]; regulation of cell shape [GO:0008360]
A0A0M0EHZ9	4300000	2200000	3300000	460000	Komagataeibacter europaeus (Gluconacetobacter europaeus)	1205159761	1526479751	3	11	3	321	34784	618	585	3514317465	pqiB2	Paraquat-inducible protein B	integral component of membrane [GO:0016021]
A0A0M0ED78	4700000	23000000	20000000	23000000	Komagataeibacter europaeus (Gluconacetobacter europaeus)	1515040191	1104477612	2	12	1	335	35912	613	389	3440653253	yhdN3	General stress protein 69 (EC 1.1.1.-)	oxidoreductase activity [GO:0016491]
A0A0M0ELH5	1400000	6700000	2600000	8200000	Komagataeibacter europaeus (Gluconacetobacter europaeus)	1386905649	1420118343	2	9	2	338	36591	568	233	3225997686	bioB	Biotin synthase (EC 2.8.1.6)	2 iron, 2 sulfur cluster binding [GO:0051537]; 4 iron, 4 sulfur cluster binding [GO:0051539]; biotin synthase activity [GO:0004076]; iron ion binding [GO:0005506]; biotin biosynthetic process [GO:0009102]
A0A0M0EJA1	2800000	4000000			Komagataeibacter europaeus (Gluconacetobacter europaeus)	1164763045	1074130106	3	10	3	661	74041	616	25	303451755	cocE	Cocaine esterase (EC 3.1.1.84)	dipeptidyl-peptidase activity [GO:0008239]
A0A0M0EJQ1	4600000	3600000	4900000	17000000	Komagataeibacter europaeus (Gluconacetobacter europaeus)	1120645888	1690140845	2	8	2	213	22199	587	425	3016322613	cobH	Precorrin-8X methylmutase (EC 5.4.99.61)	precorrin-8X methylmutase activity [GO:0016993]; cobalamin biosynthetic process [GO:0009236]
A0A0M0EHX5	630000	1500000	2300000	440000	Komagataeibacter europaeus (Gluconacetobacter europaeus)	1048795165	2256410256	3	10	3	195	21843	914	995	2942851591		Uncharacterized protein
A0A0M0EG32	6100000	10000000	7300000	4300000	Komagataeibacter europaeus (Gluconacetobacter europaeus)	1216676494	2160493827	3	9	3	162	18169	894	131	2858550692	pasT	Persistence and stress-resistance toxin PasT
A0A0M0EDE2	1400000	4200000	1400000		Komagataeibacter europaeus (Gluconacetobacter europaeus)	1354909529	1604395604	4	11	4	455	48929	599	304	2825471354		8-oxoguanine deaminase (EC 3.5.4.32)	8-oxoguanine deaminase activity [GO:0102127]
A0A0M0ENA9	1600000	2900000	3500000	8500000	Komagataeibacter europaeus (Gluconacetobacter europaeus)	1580080781	301369863	5	13	5	219	24751	923	1448	2529036915		Uncharacterized protein
A0A0M0EEF5	2400000	9800000	1200000	5400000	Komagataeibacter europaeus (Gluconacetobacter europaeus)	145280855	246835443	4	9	4	316	34166	761	54	2504395175	mltB	Membrane-bound lytic murein transglycosylase B (EC 4.2.2.-)	lyase activity [GO:0016829]
A0A0M0EJF4	1400000		5700000	3600000	Komagataeibacter europaeus (Gluconacetobacter europaeus)	1324261707	1141975309	2	7	2	324	345	1092	995	2432230353		Tim44-like domain protein	integral component of membrane [GO:0016021]
A0A0M0EE79	4100000		7600000		Komagataeibacter europaeus (Gluconacetobacter europaeus)	1794394368	1228070175	2	6	2	342	37379	909	468	2260007477	fabG8	3-oxoacyl-[acyl-carrier-protein] reductase FabG (EC 1.1.1.100)	3-oxo-glutaryl-[acp] methyl ester reductase activity [GO:0102131]; 3-oxo-pimeloyl-[acp] methyl ester reductase activity [GO:0102132]; 3-oxoacyl-[acyl-carrier-protein] reductase (NADPH) activity [GO:0004316]
A0A0M0EHZ3	670000	610000		270000	Komagataeibacter europaeus (Gluconacetobacter europaeus)	1928328995	1222091657	6	9	3	851	93021	976	304	2215860653	ybiO2	Moderate conductance mechanosensitive channel YbiO	integral component of membrane [GO:0016021]; transmembrane transport [GO:0055085]
A0A0M0EKW1	920000	2400000	1300000	810000	Komagataeibacter europaeus (Gluconacetobacter europaeus)	6861742724	1142857143	2	7	2	245	25957	64	311	2109088373	kpsU	3-deoxy-manno-octulosonate cytidylyltransferase (EC 2.7.7.38)	3-deoxy-manno-octulosonate cytidylyltransferase activity [GO:0008690]; lipopolysaccharide biosynthetic process [GO:0009103]
A0A0M0EHA1		11000000	4200000		Komagataeibacter europaeus (Gluconacetobacter europaeus)	7762053746	8949416342	2	11	1	257	271	727	311	209399699	fabG5	3-oxoacyl-[acyl-carrier-protein] reductase FabG (EC 1.1.1.100)	3-oxo-glutaryl-[acp] methyl ester reductase activity [GO:0102131]; 3-oxo-pimeloyl-[acp] methyl ester reductase activity [GO:0102132]; 3-oxoacyl-[acyl-carrier-protein] reductase (NADPH) activity [GO:0004316]
A0A0M0EJ49	1900000			3300000	Komagataeibacter europaeus (Gluconacetobacter europaeus)	6978821455	2397003745	2	6	2	267	27642	733	425	2070384288	mhpD	2-keto-4-pentenoate hydratase (EC 4.2.1.80)	2-oxopent-4-enoate hydratase activity [GO:0008684]
A0A0M0EG80	1200000	7900000	5800000		Komagataeibacter europaeus (Gluconacetobacter europaeus)	1521355171	3244680851	3	6	3	188	20826	629	2728	1969526625	gntK2	Gluconokinase (EC 2.7.1.12)	ATP binding [GO:0005524]; gluconokinase activity [GO:0046316]; carbohydrate metabolic process [GO:0005975]
A0A0M0EGJ8			3300000	3800000	Komagataeibacter europaeus (Gluconacetobacter europaeus)	4802629835	8403361345	2	6	1	357	39441	1068	202	1816274607		Transposase IS116/IS110/IS902 family protein	DNA binding [GO:0003677]; transposase activity [GO:0004803]; transposition, DNA-mediated [GO:0006313]
A0A0M0ELK3		510000	6200000	8400000	Komagataeibacter europaeus (Gluconacetobacter europaeus)	1453635955	1441947566	4	6	4	534	57534	689	374	1756603694		Tannase and feruloyl esterase	carboxylic ester hydrolase activity [GO:0052689]; metal ion binding [GO:0046872]
A0A0M0EF79	1500000			2000000	Komagataeibacter europaeus (Gluconacetobacter europaeus)	7253440649	5918057663	2	5	2	659	71434	616	129	1651444221	slt5	Soluble lytic murein transglycosylase (EC 4.2.2.-)	membrane [GO:0016020]; periplasmic space [GO:0042597]; hydrolase activity, hydrolyzing O-glycosyl compounds [GO:0004553]; lyase activity [GO:0016829]; lytic transglycosylase activity [GO:0008933]; peptidoglycan metabolic process [GO:0000270]
A0A0M0EFG5	1300000	8000000		4200000	Komagataeibacter europaeus (Gluconacetobacter europaeus)	7285217402	6386292835	2	4	2	642	69036	772	136	1467620373	tkt3	Transketolase (EC 2.2.1.1)	metal ion binding [GO:0046872]; transketolase activity [GO:0004802]
A0A0M0EBS3		720000	810000	2000000	Komagataeibacter europaeus (Gluconacetobacter europaeus)	7992673581	7558139535	2	5	2	344	37769	5	334	1340625525		Uncharacterized protein
A0A0M0EGW7	570000	4100000	2200000	2500000	Komagataeibacter europaeus (Gluconacetobacter europaeus)	43629553	8368200837	2	5	2	239	26248	955	359	1130878222	nth	Endonuclease III (EC 4.2.99.18) (DNA-(apurinic or apyrimidinic site) lyase)	4 iron, 4 sulfur cluster binding [GO:0051539]; class I DNA-(apurinic or apyrimidinic site) endonuclease activity [GO:0140078]; DNA binding [GO:0003677]; DNA N-glycosylase activity [GO:0019104]; endonuclease activity [GO:0004519]; metal ion binding [GO:0046872]; base-excision repair [GO:0006284]
U3U9V3			1200000	4500000	Komagataeibacter europaeus (Gluconacetobacter europaeus)	4901210092	1114864865	2	5	2	296	32829	623	292	1090249288	aldC	Alpha-acetolactate decarboxylase (EC 4.1.1.5)	acetolactate decarboxylase activity [GO:0047605]; acetoin biosynthetic process [GO:0045151]
A0A0M0EHX4	2100000	3000000			Komagataeibacter europaeus (Gluconacetobacter europaeus)	4236284554	1008645533	2	3	2	347	36943	68	222	7769085288	folP	Dihydropteroate synthase (DHPS) (EC 2.5.1.15) (Dihydropteroate pyrophosphorylase)	dihydropteroate synthase activity [GO:0004156]; metal ion binding [GO:0046872]; folic acid biosynthetic process [GO:0046656]; tetrahydrofolate biosynthetic process [GO:0046654]
A0A0M0EK94			2300000	690000	Komagataeibacter europaeus (Gluconacetobacter europaeus)	6368829679	1124497992	2	2	2	249	27346	964	389	7413088799	arnC	Undecaprenyl-phosphate 4-deoxy-4-formamido-L-arabinose transferase (EC 2.4.2.53)	undecaprenyl-phosphate 4-deoxy-4-formamido-L-arabinose transferase activity [GO:0099621]
A0A0M0EGM9	2100000		600000		Komagataeibacter europaeus (Gluconacetobacter europaeus)	4273862463	4242424242	2	3	2	495	54242	642	186	6407449841		Alpha/beta hydrolase family protein	serine-type peptidase activity [GO:0008236]
A0A0M0EJC3	1300000	1400000	2100000		Komagataeibacter europaeus (Gluconacetobacter europaeus)	6464354029	1448763251	2	5	2	283	30371	633	468	1714091682	phoC1	Acid phosphatase (EC 3.1.3.2)	outer membrane-bounded periplasmic space [GO:0030288]; acid phosphatase activity [GO:0003993]
A0A0D6PVV3	1200000	1900000	810000		Komagataeibacter europaeus NBRC 3261	2555889187	8453865337	27	261	1	401	42636	674	167761	8830221932	argD	Acetylornithine aminotransferase (ACOAT) (EC 2.6.1.11)	cytoplasm [GO:0005737]; N2-acetyl-L-ornithine:2-oxoglutarate 5-aminotransferase activity [GO:0003992]; pyridoxal phosphate binding [GO:0030170]; arginine biosynthetic process [GO:0006526]
A0A0D6Q0B2	1100000	6800000	590000	5300000	Komagataeibacter europaeus NBRC 3261	1020847006	4081632653	20	119	1	686	74256	574	3072	3364415839	glyS	Glycine--tRNA ligase beta subunit (EC 6.1.1.14) (Glycyl-tRNA synthetase beta subunit) (GlyRS)	cytoplasm [GO:0005737]; arginine-tRNA ligase activity [GO:0004814]; ATP binding [GO:0005524]; glycine-tRNA ligase activity [GO:0004820]; arginyl-tRNA aminoacylation [GO:0006420]; glycyl-tRNA aminoacylation [GO:0006426]
A0A0D6PYA5			7500000	13000000	Komagataeibacter europaeus NBRC 3261	321379357	3321167883	5	36	1	274	29123	533	1154	1211084297		Chromosome partitioning ATPase ParA
A0A0D6Q420	2000000	2300000	3400000	1600000	Komagataeibacter europaeus NBRC 3261	4723269045	208869814	8	31	2	699	77632	827	679	1079160678		TonB-dependent ferrichrome siderophore receptor	cell outer membrane [GO:0009279]
A0A0D6Q2P9	2100000			2100000	Komagataeibacter europaeus NBRC 3261	1261667686	8771929825	4	16	1	570	59451	931	425	5155962491		ABC transporter cysteine exporter CydD	integral component of membrane [GO:0016021]; ATP binding [GO:0005524]; ATPase activity [GO:0016887]; ATPase-coupled transmembrane transporter activity [GO:0042626]; cysteine transport [GO:0042883]
A0A0D6Q2S2	810000	4900000	3300000	1100000	Komagataeibacter europaeus NBRC 3261	2092054591	1397459165	5	12	5	551	58435	539	778	3304772401		Pyruvate decarboxylase	carboxy-lyase activity [GO:0016831]; magnesium ion binding [GO:0000287]; thiamine pyrophosphate binding [GO:0030976]
A0A0D6PUT4	450000		900000		Komagataeibacter europaeus NBRC 3261	1985410005	1401050788	5	9	5	571	63233	857	377	3029224586		Secretion system type I outer membrane RND efflux pump lipoprotein NodT	integral component of membrane [GO:0016021]; plasma membrane [GO:0005886]; efflux transmembrane transporter activity [GO:0015562]
A0A0D6Q2D5	1500000	2700000	1200000	5600000	Komagataeibacter europaeus NBRC 3261	1214045303	1228070175	2	14	2	285	30441	54	701	3020573092		Uncharacterized protein
A0A0D6PX14		10000000		7200000	Komagataeibacter europaeus NBRC 3261	1588813909	2245989305	4	10	4	187	2069	478	161	2896624839		Uncharacterized protein
A0A0D6PXT9		11000000	5600000	5300000	Komagataeibacter europaeus NBRC 3261	8730157257	7425742574	2	9	2	404	43077	687	245	2690954614		Aminotransferase	pyridoxal phosphate binding [GO:0030170]; transaminase activity [GO:0008483]
A0A0D6PXQ0		1800000	2300000	1900000	Komagataeibacter europaeus NBRC 3261	1150364425	1583850932	3	8	3	322	36368	104	369	2317917538		Uncharacterized protein
A0A0D6Q3A3	1700000		1500000		Komagataeibacter europaeus NBRC 3261	1183976487	1046511628	4	7	4	516	55381	673	445	2077773666	secD	Protein translocase subunit SecD	integral component of membrane [GO:0016021]; plasma membrane [GO:0005886]; P-P-bond-hydrolysis-driven protein transmembrane transporter activity [GO:0015450]; intracellular protein transmembrane transport [GO:0065002]; protein targeting [GO:0006605]; protein transport by the Sec complex [GO:0043952]
A0A0D6PY69		2300000	5300000	4500000	Komagataeibacter europaeus NBRC 3261	8660915963	9265175719	2	7	2	313	31985	699	874	1997476983		Uncharacterized protein
A0A0D6PYQ7	1400000	1400000			Komagataeibacter europaeus NBRC 3261	109955486	1044117647	5	7	5	680	73177	662	354	1871709299	nadE	Glutamine-dependent NAD(+) synthetase (EC 6.3.5.1) (NAD(+) synthase [glutamine-hydrolyzing])	cytoplasm [GO:0005737]; ATP binding [GO:0005524]; glutaminase activity [GO:0004359]; NAD+ synthase (glutamine-hydrolyzing) activity [GO:0003952]; NAD+ synthase activity [GO:0008795]; NAD biosynthetic process [GO:0009435]
A0A0D6PV84	400000	2800000	1100000		Komagataeibacter europaeus NBRC 3261	5937274365	9439528024	2	6	2	339	37009	1054	389	1788081098		ABC transporter spermidine/putrescine permease	periplasmic space [GO:0042597]
A0A0D6PVM7	3400000		1200000	2300000	Komagataeibacter europaeus NBRC 3261	625022345	2470588235	2	7	2	85	9265	977	2162	1784136152		Uncharacterized protein	integral component of membrane [GO:0016021]
A0A0D6PW20	7700000	7300000	1800000		Komagataeibacter europaeus NBRC 3261	1135788807	1034482759	3	5	3	464	47466	647	304	1646879339	trpD	Anthranilate phosphoribosyltransferase (EC 2.4.2.18)	anthranilate phosphoribosyltransferase activity [GO:0004048]; magnesium ion binding [GO:0000287]; tryptophan biosynthetic process [GO:0000162]
A0A0D6PZ00	2500000	1500000		4400000	Komagataeibacter europaeus NBRC 3261	9009635551	1844660194	2	6	2	206	2243	702	778	1645651746		Thiamine phosphate pyrophosphorylase	catalytic activity [GO:0003824]
A0A0D6PX24	950000		640000		Komagataeibacter europaeus NBRC 3261	9024271442	9403669725	3	5	3	436	46943	926	304	1504696107		FAD dependent oxidoreductase	oxidoreductase activity [GO:0016491]
A0A0D6PZX5		3400000	880000		Komagataeibacter europaeus NBRC 3261	5546418716	1768292683	2	4	2	164	17781	668	778	1374129176		Peptidyl-prolyl cis-trans isomerase (EC 5.2.1.8)	peptidyl-prolyl cis-trans isomerase activity [GO:0003755]
A0A0D6PYC6	780000	3400000		1800000	Komagataeibacter europaeus NBRC 3261	7757340225	1917808219	2	5	2	219	2393	503	389	1317084825		Segregation and condensation protein B	cell division [GO:0051301]; chromosome separation [GO:0051304]
A0A0D6PX49	4100000	3200000	2500000	1900000	Komagataeibacter europaeus NBRC 3261	6506601067	7725321888	2	5	2	466	51548	813	16	130045166		Deoxyribodipyrimidine photo-lyase	lyase activity [GO:0016829]; protein-chromophore linkage [GO:0018298]
A0A0D6Q1V4			590000	130000	Komagataeibacter europaeus NBRC 3261	7701007143	7343412527	2	4	2	463	49567	686	186	1295818019		Secretion system type I outer membrane efflux pump lipoprotein NodT	efflux transmembrane transporter activity [GO:0015562]
A0A0D6Q2B7		3600000	2100000		Komagataeibacter europaeus NBRC 3261	8263708132	1137566138	3	4	3	378	38115	721	438	1211914921		Cysteine desulfurase NifS/aminotransferase class V	cysteine desulfurase activity [GO:0031071]; transaminase activity [GO:0008483]
A0A0D6PVM0	4700000			3400000	Komagataeibacter europaeus NBRC 3261	6187572924	3012048193	2	4	2	83	9188	876	1512	1201435709		Uncharacterized protein
A0A0D6PZY3		2000000	890000	510000	Komagataeibacter europaeus NBRC 3261	121884412	1018518519	4	5	4	540	59414	54	374	1200923419		ABC transporter	ATP binding [GO:0005524]; ATPase activity [GO:0016887]
A0A0D6PX06		3000000	820000		Komagataeibacter europaeus NBRC 3261	6553953446	1083591331	2	4	2	323	32828	84	311	1082244849	gpsA	Glycerol-3-phosphate dehydrogenase [NAD(P)+] (EC 1.1.1.94) (NAD(P)H-dependent glycerol-3-phosphate dehydrogenase)	glycerol-3-phosphate dehydrogenase complex [GO:0009331]; glycerol-3-phosphate dehydrogenase [NAD+] activity [GO:0004367]; NAD binding [GO:0051287]; carbohydrate metabolic process [GO:0005975]; glycerol-3-phosphate biosynthetic process [GO:0046167]; glycerol-3-phosphate catabolic process [GO:0046168]; glycerophospholipid metabolic process [GO:0006650]; phospholipid biosynthetic process [GO:0008654]
A0A0D6Q2B5	2100000	5300000	2900000	890000	Komagataeibacter europaeus NBRC 3261	87393079	4719501336	3	5	3	1123	119032	635	99	1039140248		Cobaltochelatase subunit CobN	biosynthetic process [GO:0009058]
A0A0D6PY77		3200000		320000	Komagataeibacter europaeus NBRC 3261	6496557982	188976378	2	5	2	127	13766	692	668	9994749784		Iron-sulfur (Fe-S) cluster assembly protein	iron-sulfur cluster binding [GO:0051536]; structural molecule activity [GO:0005198]; protein maturation by iron-sulfur cluster transfer [GO:0097428]
A0A0D6PYY5	3200000		8700000		Komagataeibacter europaeus NBRC 3261	5016863077	1207729469	2	4	2	207	22559	1141	468	9493767977		COQ9 domain-containing protein
A0A0D6Q0U4	1200000	12000000			Komagataeibacter europaeus NBRC 3261	5730290967	5492424242	2	3	2	528	56666	558	179	9136595964		ABC transporter sugar	ATP binding [GO:0005524]; ATPase activity [GO:0016887]
A0A0D6Q3V6	1500000	6600000		9100000	Komagataeibacter europaeus NBRC 3261	6336631753	7317073171	2	4	2	410	45327	602	259	8124219894		Methylthioribose kinase	S-methyl-5-thioribose kinase activity [GO:0046522]; methionine biosynthetic process [GO:0009086]
A0A0D6PYV9		28000000	16000000		Komagataeibacter europaeus NBRC 3261	6661455222	1643835616	2	4	2	219	23678	607	52	7370774269		Metallo-beta-lactamase
A0A0D6Q034	3300000	4900000			Komagataeibacter europaeus NBRC 3261	5144096691	744047619	2	3	2	336	38809	514	334	7156511903		Ribonucleoside-diphosphate reductase subunit beta (EC 1.17.4.1)	metal ion binding [GO:0046872]; ribonucleoside-diphosphate reductase activity, thioredoxin disulfide as acceptor [GO:0004748]; deoxyribonucleotide biosynthetic process [GO:0009263]; DNA replication [GO:0006260]
A0A0D6PXL9	2700000		1900000		Komagataeibacter europaeus NBRC 3261	6255491723	1260869565	2	2	2	230	25456	81	389	6308205843		Phosphoadenylyl-sulfate reductase (thioredoxin) (EC 1.8.4.8)	phosphoadenylyl-sulfate reductase (thioredoxin) activity [GO:0004604]; hydrogen sulfide biosynthetic process [GO:0070814]; sulfate assimilation, phosphoadenylyl sulfate reduction by phosphoadenylyl-sulfate reductase (thioredoxin) [GO:0019379]
A0A0D6PXU6		5500000	590000		Komagataeibacter europaeus NBRC 3261	7170450441	5813953488	2	2	2	430	46199	759	194	5674505472		RNA helicase	ATP binding [GO:0005524]; helicase activity [GO:0004386]; nucleic acid binding [GO:0003676]
A0A0D6PZY0		2700000	500000		Komagataeibacter europaeus NBRC 3261	4147420716	8949416342	2	2	2	257	27291	1011	468	5275772333		NADP oxidoreductase coenzyme F420-dependent
A0A0N1N5N4	2200000		8300000	7400000	Komagataeibacter intermedius AF2	6032974944	5527950311	8	53	2	161	18337	728	22714	1735013903	rpsF	30S ribosomal protein S6	ribosome [GO:0005840]; rRNA binding [GO:0019843]; structural constituent of ribosome [GO:0003735]; translation [GO:0006412]
A0A0N0MGC3		52000000	63000000	45000000	Komagataeibacter intermedius AF2	5095975718	3295711061	10	55	1	443	48468	684	3329	1680486649		Dihydroorotase (EC 3.5.2.3)	hydrolase activity, acting on carbon-nitrogen (but not peptide) bonds, in cyclic amides [GO:0016812]; metal ion binding [GO:0046872]
A0A0N1F9B8	16000000	65000000			Komagataeibacter intermedius AF2	4800585071	1604278075	2	7	1	187	20727	686	668	1287244797		Uncharacterized protein
A0A0C1UX99			3100000	2900000	Komagataeibacter intermedius AF2	8559968702	6435643564	2	4	2	404	45109	917	179	952779007		Mutator family transposase	DNA binding [GO:0003677]; transposase activity [GO:0004803]; transposition, DNA-mediated [GO:0006313]
A0A2S3W5L1		20000000	1900000		Komagataeibacter maltaceti	4704484165	174	9	61	1	500	53972	681	1929	173480432	guaB	Inosine-5'-monophosphate dehydrogenase (IMP dehydrogenase) (IMPD) (IMPDH) (EC 1.1.1.205)	IMP dehydrogenase activity [GO:0003938]; metal ion binding [GO:0046872]; nucleotide binding [GO:0000166]; GMP biosynthetic process [GO:0006177]
A0A2S3W5Y1	850000	600000	510000	1800000	Komagataeibacter maltaceti	6356093318	9455587393	2	6	2	349	3912	819	186	1570553827	lipA	Lipoyl synthase (EC 2.8.1.8) (Lip-syn) (LS) (Lipoate synthase) (Lipoic acid synthase) (Sulfur insertion protein LipA)	cytoplasm [GO:0005737]; 4 iron, 4 sulfur cluster binding [GO:0051539]; lipoate synthase activity [GO:0016992]; lipoyl synthase activity (acting on glycine-cleavage complex H protein [GO:0102552]; lipoyl synthase activity (acting on pyruvate dehydrogenase E2 protein) [GO:0102553]; metal ion binding [GO:0046872]; protein lipoylation [GO:0009249]
G2I0I4	560000		9900000		Komagataeibacter medellinensis (strain NBRC 3288 / BCRC 11682 / LMG 1693 / Kondo 51) (Gluconacetobacter medellinensis)	9160481349	2066045724	16	83	1	1181	12982	53	819	2364142305		Methionine synthase (EC 2.1.1.13) (5-methyltetrahydrofolate--homocysteine methyltransferase)	cobalamin binding [GO:0031419]; methionine synthase activity [GO:0008705]; zinc ion binding [GO:0008270]; methylation [GO:0032259]; pteridine-containing compound metabolic process [GO:0042558]
G2I0M9		3400000		7200000	Komagataeibacter medellinensis (strain NBRC 3288 / BCRC 11682 / LMG 1693 / Kondo 51) (Gluconacetobacter medellinensis)	4201838043	4492753623	9	45	1	276	29952	597	3281	1335774696		Hydrolase	hydrolase activity [GO:0016787]
G2I5G9	3200000		18000000		Komagataeibacter medellinensis (strain NBRC 3288 / BCRC 11682 / LMG 1693 / Kondo 51) (Gluconacetobacter medellinensis)	182830696	1324200913	3	17	1	438	48217	564	269	5142386365		Endopeptidase ATP-dependent hsl ATP-binding subunit	HslUV protease complex [GO:0009376]; ATP binding [GO:0005524]; ATPase activity [GO:0016887]; peptidase activity [GO:0008233]
G2HZT0		1500000	780000		Komagataeibacter medellinensis (strain NBRC 3288 / BCRC 11682 / LMG 1693 / Kondo 51) (Gluconacetobacter medellinensis)	6291289106	1265060241	2	5	2	166	18548	535	425	1449818015	atpF	ATP synthase subunit b (ATP synthase F(0) sector subunit b) (ATPase subunit I) (F-type ATPase subunit b) (F-ATPase subunit b)	integral component of membrane [GO:0016021]; plasma membrane [GO:0005886]; proton-transporting ATP synthase complex, coupling factor F(o) [GO:0045263]; proton-transporting ATP synthase activity, rotational mechanism [GO:0046933]
A0A1U9RKM7	2000000		38000000		Komagataeibacter nataicola	1100109029	293029872	12	103	2	703	76064	651	235	3420770631		Transketolase	metal ion binding [GO:0046872]; transketolase activity [GO:0004802]
A0A1U9RJB8		4600000	6100000		Komagataeibacter nataicola	3782341865	3280542986	6	44	1	442	47658	657	131	1420510155		Aldehyde dehydrogenase	integral component of membrane [GO:0016021]; plasma membrane [GO:0005886]; electron transfer activity [GO:0009055]; heme binding [GO:0020037]; iron ion binding [GO:0005506]; oxidoreductase activity, acting on CH-OH group of donors [GO:0016614]
A0A1U9RM17			2200000	3900000	Komagataeibacter nataicola	1520659966	1165803109	3	13	1	386	42306	758	624	3974098015	tgt	Queuine tRNA-ribosyltransferase (EC 2.4.2.29) (Guanine insertion enzyme) (tRNA-guanine transglycosylase)	metal ion binding [GO:0046872]; queuine tRNA-ribosyltransferase activity [GO:0008479]; queuosine biosynthetic process [GO:0008616]; tRNA-guanine transglycosylation [GO:0101030]
A0A318QW36		3300000		4000000	Komagataeibacter oboediens	1974927759	4308176101	15	678	2	318	34698	545	87587	2390875335		Arylesterase	hydrolase activity [GO:0016787]
A0A318RA55	6500000	8400000	4200000	27000000	Komagataeibacter oboediens	2992996039	2235576923	7	31	1	416	44864	611	1276	8292359042		Cysteine desulfurase (EC 2.8.1.7)	cysteine desulfurase activity [GO:0031071]; pyridoxal phosphate binding [GO:0030170]; cysteine metabolic process [GO:0006534]
A0A318QSX7	3900000	8000000	9200000	4100000	Komagataeibacter oboediens	486001474	7379032258	10	27	10	248	27466	639	6197	7758846974		Histidine phosphatase family protein
A0A318QE91	9800000		19000000		Komagataeibacter oboediens	9501457471	8571428571	2	6	1	350	38641	1042	212	2307812381		IS110 family transposase	DNA binding [GO:0003677]; transposase activity [GO:0004803]; transposition, DNA-mediated [GO:0006313]
A0A318QMB9		2900000	6500000	12000000	Komagataeibacter oboediens	1482265198	2466216216	4	11	2	296	32266	692	668	1393668795		Oxidoreductase	oxidoreductase activity [GO:0016491]
A0A318QMZ1		3200000	16000000	410000	Komagataeibacter pomaceti	6265085172	2360594796	10	73	2	538	59798	624	188	1779421757	lysS	Lysine--tRNA ligase (EC 6.1.1.6) (Lysyl-tRNA synthetase) (LysRS)	cytoplasm [GO:0005737]; ATP binding [GO:0005524]; lysine-tRNA ligase activity [GO:0004824]; tRNA binding [GO:0000049]; lysyl-tRNA aminoacylation [GO:0006430]
A0A070A395		22000000		23000000	Komagataeibacter rhaeticus AF1	1243050692	2972689076	26	155	1	952	10396	604	2217	4651709968	tal	Transaldolase (EC 2.2.1.2)	cytoplasm [GO:0005737]; glucose-6-phosphate isomerase activity [GO:0004347]; sedoheptulose-7-phosphate:D-glyceraldehyde-3-phosphate glyceronetransferase activity [GO:0004801]; gluconeogenesis [GO:0006094]; glycolytic process [GO:0006096]; pentose-phosphate shunt [GO:0006098]
A0A070AB84		10000000	1400000		Komagataeibacter rhaeticus AF1	642780113	2888198758	14	68	1	644	735	611	1565	2012581291	thrS	Threonine--tRNA ligase (EC 6.1.1.3) (Threonyl-tRNA synthetase) (ThrRS)	cytoplasm [GO:0005737]; ATP binding [GO:0005524]; metal ion binding [GO:0046872]; threonine-tRNA ligase activity [GO:0004829]; tRNA binding [GO:0000049]; threonyl-tRNA aminoacylation [GO:0006435]
A0A070A3N0		940000	7100000	6100000	Komagataeibacter rhaeticus AF1	4335091209	2686308492	12	37	1	577	5952	587	1712	1019021338		Dihydrolipoyl dehydrogenase (EC 1.8.1.4)	dihydrolipoyl dehydrogenase activity [GO:0004148]; flavin adenine dinucleotide binding [GO:0050660]; cell redox homeostasis [GO:0045454]
A0A070A9G0	3000000	630000		2500000	Komagataeibacter rhaeticus AF1	506663016	1212121212	2	6	2	297	32444	66	334	1522233295		DUF2272 domain-containing protein
A0A347WBE0			380000	1100000	Komagataeibacter saccharivorans	8660520253	3205882353	12	75	1	340	35808	644	6197	2744614689	cysK_1	Cysteine synthase (EC 2.5.1.47)	cysteine synthase activity [GO:0004124]; cysteine biosynthetic process from serine [GO:0006535]
A0A371Z1R0		13000000	38000000		Komagataeibacter sp. AV 382	5760848278	351744186	7	60	1	344	36747	592	3437	175986554	adhP	Alcohol dehydrogenase AdhP	oxidoreductase activity [GO:0016491]; zinc ion binding [GO:0008270]
A0A371YXA7			1100000	2200000	Komagataeibacter sp. AV 382	3742548444	20	8	57	1	520	57386	788	1207	1515382887		Glycerol-3-phosphate dehydrogenase (EC 1.1.5.3)	glycerol-3-phosphate dehydrogenase complex [GO:0009331]; sn-glycerol-3-phosphate:ubiquinone-8 oxidoreductase activity [GO:0052591]; glycerol-3-phosphate metabolic process [GO:0006072]
A0A318QP60	5900000	19000000		4100000	Komagataeibacter sucrofermentans	25265099	6822810591	24	341	1	491	52329	503	48239	1191889061	atpD	ATP synthase subunit beta (EC 7.1.2.2) (ATP synthase F1 sector subunit beta) (F-ATPase subunit beta)	plasma membrane [GO:0005886]; proton-transporting ATP synthase complex, catalytic core F(1) [GO:0045261]; ATP binding [GO:0005524]; proton-transporting ATP synthase activity, rotational mechanism [GO:0046933]; proton-transporting ATPase activity, rotational mechanism [GO:0046961]
A0A318QUK0		29000000	5300000	13000000	Komagataeibacter sucrofermentans	9435949437	5406504065	11	65	2	246	26267	844	17478	2341568301	pyrH	Uridylate kinase (UK) (EC 2.7.4.22) (Uridine monophosphate kinase) (UMP kinase) (UMPK)	cytoplasm [GO:0005737]; ATP binding [GO:0005524]; UMP kinase activity [GO:0033862]; 'de novo' CTP biosynthetic process [GO:0044210]
A0A318R1H5	960000	5800000		7800000	Komagataeibacter sucrofermentans	7024213792	4956896552	15	50	2	464	49067	944	2415	165930721	ffh	Signal recognition particle protein (Fifty-four homolog)	plasma membrane [GO:0005886]; signal recognition particle [GO:0048500]; 7S RNA binding [GO:0008312]; GTP binding [GO:0005525]; GTPase activity [GO:0003924]; SRP-dependent cotranslational protein targeting to membrane [GO:0006614]
A0A2V4S7Y6	740000		5200000	16000000	Komagataeibacter swingsii	1090409139	5340909091	20	114	2	440	4935	602	18307	367068001	proS	Proline--tRNA ligase (EC 6.1.1.15) (Prolyl-tRNA synthetase) (ProRS)	cytoplasm [GO:0005737]; ATP binding [GO:0005524]; proline-tRNA ligase activity [GO:0004827]; prolyl-tRNA aminoacylation [GO:0006433]
A0A2V4R8Q0		7800000	5400000		Komagataeibacter swingsii	4359432208	5989847716	7	40	1	197	21041	588	26826	1186352839	hslV	ATP-dependent protease subunit HslV (EC 3.4.25.2)	HslUV protease complex [GO:0009376]; proteasome core complex [GO:0005839]; metal ion binding [GO:0046872]; threonine-type endopeptidase activity [GO:0004298]; proteolysis involved in cellular protein catabolic process [GO:0051603]
A0A2V4S3R5	6200000	11000000	1900000	7000000	Komagataeibacter swingsii	1564108431	7440100883	4	11	4	793	85753	673	315	3381235266	xdhB	Xanthine dehydrogenase molybdopterin binding subunit	molybdenum ion binding [GO:0030151]; oxidoreductase activity [GO:0016491]
A0A318PY55	3700000	41000000		5700000	Komagataeibacter xylinus (Gluconacetobacter xylinus)	221931199	442804428	32	248	2	1084	116385	53	6356	7838799273	carB	Carbamoyl-phosphate synthase large chain (EC 6.3.5.5) (Carbamoyl-phosphate synthetase ammonia chain)	ATP binding [GO:0005524]; carbamoyl-phosphate synthase (glutamine-hydrolyzing) activity [GO:0004088]; metal ion binding [GO:0046872]; 'de novo' UMP biosynthetic process [GO:0044205]; arginine biosynthetic process [GO:0006526]
A0A3T0KH34	1700000	2400000	2400000	6900000	Komagataeibacter xylinus (Gluconacetobacter xylinus)	3729573938	2696629213	9	35	1	445	50229	838	1043	9929119718	gltX	Glutamate--tRNA ligase (EC 6.1.1.17) (Glutamyl-tRNA synthetase) (GluRS)	cytoplasm [GO:0005737]; ATP binding [GO:0005524]; glutamate-tRNA ligase activity [GO:0004818]; tRNA binding [GO:0000049]; glutamyl-tRNA aminoacylation [GO:0006424]
A0A318PUS9		1100000	3200000	2700000	Komagataeibacter xylinus (Gluconacetobacter xylinus)	4071000805	2488789238	7	38	1	446	48479	699	1462	9803882611		Dihydroorotase (EC 3.5.2.3)	dihydroorotase activity [GO:0004151]; metal ion binding [GO:0046872]
W5YA31	2700000	1600000		3500000	Komagataeibacter xylinus E25	1196395471	462890625	18	120	1	512	57257	574	4722	3914098904	metG	Methionine--tRNA ligase (EC 6.1.1.10) (Methionyl-tRNA synthetase) (MetRS)	cytoplasm [GO:0005737]; ATP binding [GO:0005524]; methionine-tRNA ligase activity [GO:0004825]; methionyl-tRNA aminoacylation [GO:0006431]
W5YFA2	2100000		4700000		Komagataeibacter xylinus E25	4869094441	3068893528	11	40	2	479	5358	671	1297	1325223856		Uncharacterized protein
W5YBC7	640000	1400000			Komagataeibacter xylinus E25	3843407588	3734567901	8	46	1	324	35045	67	234	1235798727		D-isomer specific 2-hydroxyacid dehydrogenase NAD-binding protein	NAD binding [GO:0051287]; oxidoreductase activity, acting on the CH-OH group of donors, NAD or NADP as acceptor [GO:0016616]
A0A0D6Q6P1	4800000		5000000		Komagataeibacter xylinus NBRC 13693	1631875884	3015075377	5	22	2	199	22275	558	931	5685641539		Acetyltransferase	transferase activity [GO:0016740]
A0A0D6Q7I6	4200000	9700000	15000000	23000000	Komagataeibacter xylinus NBRC 13693	9984036456	1570247934	3	11	3	363	37608	665	369	3249014115	plsX	Phosphate acyltransferase (EC 2.3.1.274) (Acyl-ACP phosphotransacylase) (Acyl-[acyl-carrier-protein]--phosphate acyltransferase) (Phosphate-acyl-ACP acyltransferase)	cytoplasm [GO:0005737]; phosphate:acyl-[acyl carrier protein] acyltransferase activity [GO:0043811]; fatty acid biosynthetic process [GO:0006633]; phospholipid biosynthetic process [GO:0008654]
A0A0D6Q7K6	450000		1700000	1300000	Komagataeibacter xylinus NBRC 13693	6506351654	5009276438	2	7	2	539	61363	58	172	1934940612		Capsule polysaccharide biosynthesis protein
A0A0D6QE39			4100000	6100000	Komagataeibacter xylinus NBRC 13693	7554078364	95	2	3	2	400	44302	671	233	1130836368		Chaperone of cytochrome c oxidases	ATP binding [GO:0005524]
A0A1U9KM08	2600000	13000000	11000000	5800000	Neoasaia chiangmaiensis	8982483846	2827004219	11	91	1	474	54143	739	4012	2593543597		Hopanoid biosynthesis associated radical SAM protein HpnJ	catalytic activity [GO:0003824]; iron-sulfur cluster binding [GO:0051536]
A0A1U9KTK1	5300000	2800000	2100000	6800000	Neoasaia chiangmaiensis	1981566572	694980695	5	21	1	777	85573	627	304	4877072477	clpA	ATP-dependent Clp protease ATP-binding subunit ClpA	ATP binding [GO:0005524]; ATPase activity [GO:0016887]; peptidase activity [GO:0008233]; protein unfolding [GO:0043335]
A0A506ULZ8	3100000		7200000		Neokomagataea sp. Jb2	177412041	1280788177	4	19	1	406	45612	796	688	5054260159	hpnH	Adenosyl-hopene transferase HpnH	iron-sulfur cluster binding [GO:0051536]; metal ion binding [GO:0046872]; transferase activity [GO:0016740]
A0A506ULY4			920000	9000000	Neokomagataea sp. Jb2	8758259987	7486631016	2	5	2	374	40586	664	35	1452173305	ruvB	Holliday junction ATP-dependent DNA helicase RuvB (EC 3.6.4.12)	ATP binding [GO:0005524]; DNA binding [GO:0003677]; four-way junction helicase activity [GO:0009378]; DNA recombination [GO:0006310]; DNA repair [GO:0006281]; SOS response [GO:0009432]
A0A2S6NIG7		14000000	3300000	17000000	Rhodopila globiformis (Rhodopseudomonas globiformis)	4382535497	1660899654	10	48	1	578	63355	53	1198	1361095657		30S ribosomal protein S1	ribosome [GO:0005840]; RNA binding [GO:0003723]; structural constituent of ribosome [GO:0003735]; translation [GO:0006412]
A0A1M6ARD5	4100000	4200000			Roseomonas rosea	2922571694	5488850772	4	19	1	1166	128237	558	191	5943329287		Methionine synthase (EC 2.1.1.13) (5-methyltetrahydrofolate--homocysteine methyltransferase)	cobalamin binding [GO:0031419]; methionine synthase activity [GO:0008705]; zinc ion binding [GO:0008270]; methylation [GO:0032259]; pteridine-containing compound metabolic process [GO:0042558]
A0A4Y6UFY4			1800000	1200000	Swingsia samuiensis	2669992648	4191919192	21	587	2	396	42867	525	230013	1921901227	tuf	Elongation factor Tu (EF-Tu)	cytoplasm [GO:0005737]; GTP binding [GO:0005525]; GTPase activity [GO:0003924]; translation elongation factor activity [GO:0003746]
A0A4Y6UJ78	9700000	21000000			Swingsia samuiensis	4470137612	6138392857	4	49	1	896	97445	657	569	1702437079	acnA	Aconitate hydratase (Aconitase) (EC 4.2.1.3)	4 iron, 4 sulfur cluster binding [GO:0051539]; aconitate hydratase activity [GO:0003994]; citrate dehydratase activity [GO:0047780]; metal ion binding [GO:0046872]; tricarboxylic acid cycle [GO:0006099]
A0A0D6MML1		5800000	16000000		Tanticharoenia sakaeratensis NBRC 103193	1154089943	2711598746	15	205	2	638	67709	506	2162	6429853163	dnaK	Chaperone protein DnaK (HSP70) (Heat shock 70 kDa protein) (Heat shock protein 70)	ATP binding [GO:0005524]; unfolded protein binding [GO:0051082]; protein folding [GO:0006457]
A0A317E4Y9	2500000	4100000	2800000	3300000	Zavarzinia sp. HR-AS	6427942475	7067137809	2	8	2	283	31772	973	274	2289030242		DNA methyltransferase	methyltransferase activity [GO:0008168]; methylation [GO:0032259]

## Sheet: B_UL
File S3. List of exclusive proteins identified in the LC/MS-MS analysis in fine wine and beer vinegar profiles. The exclusive proteins were obtained by the difference between those in at least 50% out of total samples in at least one sampling time and those in each sampling time (EL, end of loading; UL, just before unloading). Several parameters of each protein are included as accession number (U…
Accession (Uniprot)	UL_1	UL_2	UL_3	Organism	Sum PEP Score	Coverage	# Peptides	# PSMs	# Unique Peptides	# AAs	MW [kDa]	calc. pI	emPAI	Score	Gene names	Protein names	Gene Ontology
W8GMH2		42000000	86000000	Acetobacter estunensis	8064748598	3609271523	11	151	1	302	32301	539	24119	3977479627	groEL	60 kDa chaperonin (Fragment)	ATP binding [GO:0005524]; protein refolding [GO:0042026]
A0A087PMA7	1300000	1200000		Acetobacter malorum	2012878277	7364341085	5	41	1	774	83703	81	35	115967634		Isoquinoline 1-oxidoreductase beta subunit (EC 1.3.99.16)	isoquinoline 1-oxidoreductase activity [GO:0047121]
A0A0K0KE00	7400000		7500000	Acetobacter orleanensis	2090336729	5176470588	27	496	1	510	54449	585	30623	15588213	groEL	60 kDa chaperonin (Fragment)	ATP binding [GO:0005524]; protein refolding [GO:0042026]
A0A0U5EY82	11000000	5200000	6200000	Acetobacter senegalensis	293325842	602006689	5	27	1	1196	131836	533	223	7786950135	metH	Methionine synthase (EC 2.1.1.13) (5-methyltetrahydrofolate--homocysteine methyltransferase)	cobalamin binding [GO:0031419]; methionine synthase activity [GO:0008705]; zinc ion binding [GO:0008270]; methylation [GO:0032259]; pteridine-containing compound metabolic process [GO:0042558]
A0A252BXT3	2300000		15000000	Acetobacter sp. DsW_063	4518299097	1866913124	9	133	2	541	57389	498	1297	3829151995	groEL	60 kDa chaperonin (GroEL protein) (Protein Cpn60)	cytoplasm [GO:0005737]; ATP binding [GO:0005524]; unfolded protein binding [GO:0051082]; protein refolding [GO:0042026]
A0A252C420		5600000	15000000	Acetobacter sp. DsW_063	2057093614	3641975309	4	19	1	162	18986	481	1424	5620327616		Bacterioferritin	ferric iron binding [GO:0008199]; cellular iron ion homeostasis [GO:0006879]; iron ion transport [GO:0006826]
A0A257UVX0		10000000	38000000	Acidiphilium sp. 37-64-53	2127612188	9688013136	5	42	1	609	66849	582	528	1176880959		Translational GTPase TypA	GTP binding [GO:0005525]; GTPase activity [GO:0003924]
A0A0P0YJL2		9700000	2400000	Asaia bogorensis NBRC 16594	1918031623	1275862069	3	17	1	290	31978	514	848	5201185322	speE	Polyamine aminopropyltransferase (Putrescine aminopropyltransferase) (PAPT) (Spermidine synthase) (SPDS) (SPDSY) (EC 2.5.1.16)	spermidine synthase activity [GO:0004766]; spermidine biosynthetic process [GO:0008295]
A0A060QCW0		8200000	460000	Asaia platycodi SF2.1	355480553	16	6	32	2	600	65517	658	453	109381454		Succinate dehydrogenase flavoprotein subunit (EC 1.3.5.1)	plasma membrane [GO:0005886]; flavin adenine dinucleotide binding [GO:0050660]; succinate dehydrogenase (ubiquinone) activity [GO:0008177]; electron transport chain [GO:0022900]; tricarboxylic acid cycle [GO:0006099]
A0A370G4F4		5100000	190000	Gluconacetobacter liquefaciens (Acetobacter liquefaciens)	5888856867	1388888889	2	4	2	144	15302	994	425	9388910532	rplK	50S ribosomal protein L11	ribosome [GO:0005840]; large ribosomal subunit rRNA binding [GO:0070180]; structural constituent of ribosome [GO:0003735]; translation [GO:0006412]
F3S5R1		36000000	49000000	Gluconacetobacter sp. SXCC-1	4515242096	660899654	63	550	1	867	9518	55	55805	1716165457	clpB	Chaperone protein ClpB	cytoplasm [GO:0005737]; ATP binding [GO:0005524]; ATPase activity [GO:0016887]; protein refolding [GO:0042026]; response to heat [GO:0009408]
F3SES0		1700000	660000	Gluconacetobacter sp. SXCC-1	5245578241	304950495	10	43	1	505	54564	677	2162	1459904889		Succinyl-CoA:coenzyme A transferase	acetate CoA-transferase activity [GO:0008775]; acetyl-CoA hydrolase activity [GO:0003986]; acetate metabolic process [GO:0006083]; acetyl-CoA metabolic process [GO:0006084]; propionate metabolic process, methylcitrate cycle [GO:0019679]
A0A4P5NSU8	6600000	11000000	24000000	Komagataeibacter diospyri	4698886516	1559766764	7	41	1	686	74589	569	52	1173300314	glyS	Glycine--tRNA ligase beta subunit (EC 6.1.1.14) (Glycyl-tRNA synthetase beta subunit) (GlyRS)	cytoplasm [GO:0005737]; arginine-tRNA ligase activity [GO:0004814]; ATP binding [GO:0005524]; glycine-tRNA ligase activity [GO:0004820]; arginyl-tRNA aminoacylation [GO:0006420]; glycyl-tRNA aminoacylation [GO:0006426]
A0A4P5NNL8	4300000		2500000	Komagataeibacter diospyri	7521407679	1609195402	2	6	2	174	18657	774	1154	1384107292		Uncharacterized protein
A0A0M0ECC9		3900000	3500000	Komagataeibacter europaeus (Gluconacetobacter europaeus)	5613405573	3248730964	9	76	1	394	43262	597	2455	2358566576	dosP13	Oxygen sensor protein DosP (EC 3.1.4.52)	cyclic-guanylate-specific phosphodiesterase activity [GO:0071111]
A0A0M0EEH6	5300000	1100000	4000000	Komagataeibacter europaeus (Gluconacetobacter europaeus)	8373933476	8518518519	14	68	1	162	19005	493	30623	1851539218	bfr2	Bacterioferritin	ferric iron binding [GO:0008199]; oxidoreductase activity [GO:0016491]; cellular iron ion homeostasis [GO:0006879]; iron ion transport [GO:0006826]
A0A0M0ELP0		11000000	17000000	Komagataeibacter europaeus (Gluconacetobacter europaeus)	1594452119	1595441595	4	6	4	351	39183	66	492	1993321872	ndmA1	Methylxanthine N1-demethylase NdmA (EC 1.14.13.178)	2 iron, 2 sulfur cluster binding [GO:0051537]; metal ion binding [GO:0046872]; methyltransferase activity [GO:0008168]; oxidoreductase activity [GO:0016491]; methylation [GO:0032259]
A0A0M0EFW4		280000	1400000	Komagataeibacter europaeus (Gluconacetobacter europaeus)	9614210167	1739130435	3	5	3	322	3269	797	585	1420831633		Sporulation related domain protein	integral component of membrane [GO:0016021]; peptidoglycan binding [GO:0042834]
A0A0M0EHI5		2900000	2800000	Komagataeibacter europaeus (Gluconacetobacter europaeus)	8187563694	6005221932	2	4	2	383	41452	939	202	1178951383	ybeZ	PhoH-like protein	ATP binding [GO:0005524]
A0A0D6Q1P3		2700000	7200000	Komagataeibacter europaeus NBRC 3261	3703651764	2329896907	8	37	2	485	54115	657	1555	1018204322		Oxidoreductase	oxidoreductase activity [GO:0016491]
A0A0D6Q416	10000000	14000000	22000000	Komagataeibacter europaeus NBRC 3261	2965736665	2877192982	5	20	1	285	30074	668	1683	5358026361		Acetyl-CoA synthetase
A0A0D6Q3D9	1700000	1900000	2900000	Komagataeibacter europaeus NBRC 3261	7949469833	701754386	2	7	2	456	49301	624	172	2389391589		Formiminoglutamate deiminase	hydrolase activity, acting on carbon-nitrogen (but not peptide) bonds [GO:0016810]
A0A0D6Q1W0	6300000	2200000		Komagataeibacter europaeus NBRC 3261	1562638924	2820512821	5	7	5	273	29512	6	1054	2136004472		Lipoprotein	membrane [GO:0016020]
A0A0D6Q1V1		2400000	3100000	Komagataeibacter europaeus NBRC 3261	7395055719	4777594728	2	4	2	607	64998	684	125	1387651968		Amidohydrolase 3	hydrolase activity, acting on carbon-nitrogen (but not peptide) bonds [GO:0016810]
A0A0D6PW35	4900000	4700000		Komagataeibacter europaeus NBRC 3261	7685455071	3375	2	3	2	80	885	52	931	1031384063	purS	Phosphoribosylformylglycinamidine synthase subunit PurS (FGAM synthase) (EC 6.3.5.3) (Formylglycinamide ribonucleotide amidotransferase subunit III) (FGAR amidotransferase III) (FGAR-AT III) (Phosphoribosylformylglycinamidine synthase subunit III)	cytoplasm [GO:0005737]; ATP binding [GO:0005524]; phosphoribosylformylglycinamidine synthase activity [GO:0004642]; 'de novo' IMP biosynthetic process [GO:0006189]
A0A0D6PUL6		3100000	1400000	Komagataeibacter europaeus NBRC 3261	5280948923	6962025316	2	4	2	316	32862	627	292	9335951805		Phosphate acetyl/butaryl transferase	transferase activity, transferring acyl groups [GO:0016746]
A0A0D6PVN8		1700000	4400000	Komagataeibacter europaeus NBRC 3261	1436093485	9855769231	3	7	3	416	44451	516	624	2166187406		Amidohydrolase/hydantoinase/carbamoylase family amidase	hydrolase activity, acting on carbon-nitrogen (but not peptide) bonds, in linear amidines [GO:0016813]; metal ion binding [GO:0046872]
A0A2S3W5F0	64000000	12000000		Komagataeibacter maltaceti	8718847607	2993630573	8	110	1	471	50303	64	3507	3894578756	adhB_1	Alcohol dehydrogenase cytochrome c subunit	plasma membrane [GO:0005886]; electron transfer activity [GO:0009055]; heme binding [GO:0020037]; iron ion binding [GO:0005506]; oxidoreductase activity, acting on CH-OH group of donors [GO:0016614]
G2I496		6300000	29000000	Komagataeibacter medellinensis (strain NBRC 3288 / BCRC 11682 / LMG 1693 / Kondo 51) (Gluconacetobacter medellinensis)	4939752578	1924460432	8	81	1	556	59584	602	1448	2446959317		Phosphoglucomutase	magnesium ion binding [GO:0000287]; phosphoglucomutase activity [GO:0004614]; carbohydrate metabolic process [GO:0005975]
A0A371Z2Z5	5700000	19000000		Komagataeibacter sp. AV 382	1259135297	1964512041	13	138	1	789	8791	651	316	3190888815		Probable phosphoketolase (EC 4.1.2.-)	aldehyde-lyase activity [GO:0016832]; carbohydrate metabolic process [GO:0005975]
A0A318QJ89	25000000	63000000	25000000	Komagataeibacter sucrofermentans	1689846389	7734939759	24	170	3	415	45898	665	23709	4682094619		Oxidoreductase
A0A318QK54		4600000	2500000	Komagataeibacter sucrofermentans	8476262635	1791044776	2	5	2	201	22617	51	389	1538679409		Uncharacterized protein
A0A318PE31	16000000	630000	860000	Komagataeibacter xylinus (Gluconacetobacter xylinus)	2240164011	2195121951	5	24	2	246	27496	89	1512	6525798094		Glycosyltransferase family 2 protein	transferase activity [GO:0016740]
W5YBN1		4400000	6600000	Komagataeibacter xylinus E25	121439457	3157199472	16	119	1	757	84133	573	2481	3903593916		C-di-GMP phosphodiesterase A (EC 2.7.13.3)	protein histidine kinase activity [GO:0004673]
W5YBW5	8500000	6500000		Komagataeibacter xylinus E25	2705568707	2125984252	4	16	1	254	27287	765	1424	6380904675		Uncharacterized protein
A0A1U9KLW9	2200000		1500000	Neoasaia chiangmaiensis	1033900181	1772151899	2	9	2	158	17301	1005	995	1692153931	rplM	50S ribosomal protein L13	ribosome [GO:0005840]; structural constituent of ribosome [GO:0003735]; translation [GO:0006412]
A0A506UMQ0	4300000	3800000	6600000	Neokomagataea sp. Jb2	2151503339	8146067416	3	21	1	712	7697	559	307	7131764627	pnp	Polyribonucleotide nucleotidyltransferase (EC 2.7.7.8) (Polynucleotide phosphorylase) (PNPase)	cytoplasm [GO:0005737]; magnesium ion binding [GO:0000287]; polyribonucleotide nucleotidyltransferase activity [GO:0004654]; RNA binding [GO:0003723]; mRNA catabolic process [GO:0006402]; RNA processing [GO:0006396]
A0A4R4DTW2	990000		470000	Paracraurococcus sp. NE82	176017584	3217550274	25	344	1	547	5782	521	17957	9229363817	groL	60 kDa chaperonin (GroEL protein) (Protein Cpn60)	cytoplasm [GO:0005737]; ATP binding [GO:0005524]; unfolded protein binding [GO:0051082]; protein refolding [GO:0042026]
D5RJD3	2300000	1100000		Roseomonas cervicalis ATCC 49957	5567289772	1077283372	9	77	1	854	93393	572	675	240230185	clpB	Chaperone protein ClpB	cytoplasm [GO:0005737]; ATP binding [GO:0005524]; ATPase activity [GO:0016887]; protein refolding [GO:0042026]; response to heat [GO:0009408]
A0A5B2TFV3	3700000	3100000		Roseomonas oryzae	6537494191	7647058824	2	7	1	340	36924	607	274	2082142687	hemB	Delta-aminolevulinic acid dehydratase (EC 4.2.1.24)	metal ion binding [GO:0046872]; porphobilinogen synthase activity [GO:0004655]; protoporphyrinogen IX biosynthetic process [GO:0006782]
A0A4Y6UH85	7600000		7800000	Swingsia samuiensis	8427137076	112195122	2	10	1	205	21376	758	585	2660694766		Cold-shock protein	cytoplasm [GO:0005737]; nucleic acid binding [GO:0003676]
A0A317EBX2	1300000	440000	1500000000	Zavarzinia compransoris	1469046094	3827751196	2	45	1	627	65565	488	241	9132019842	hscA	Chaperone protein HscA homolog	ATP binding [GO:0005524]; ATPase activity [GO:0016887]; unfolded protein binding [GO:0051082]; iron-sulfur cluster assembly [GO:0016226]; protein folding [GO:0006457]
